# Supplementary material for: FKBP10 promotes clear cell renal cell carcinoma progression and regulates sensitivity to the HIF2α blockade by facilitating LDHA phosphorylation
Source: PubMed Central journal article supplement (PMC10794466; doi:10.1038/s41419-024-06450-x), 2024-01-17

Fig. 2A  
Actin

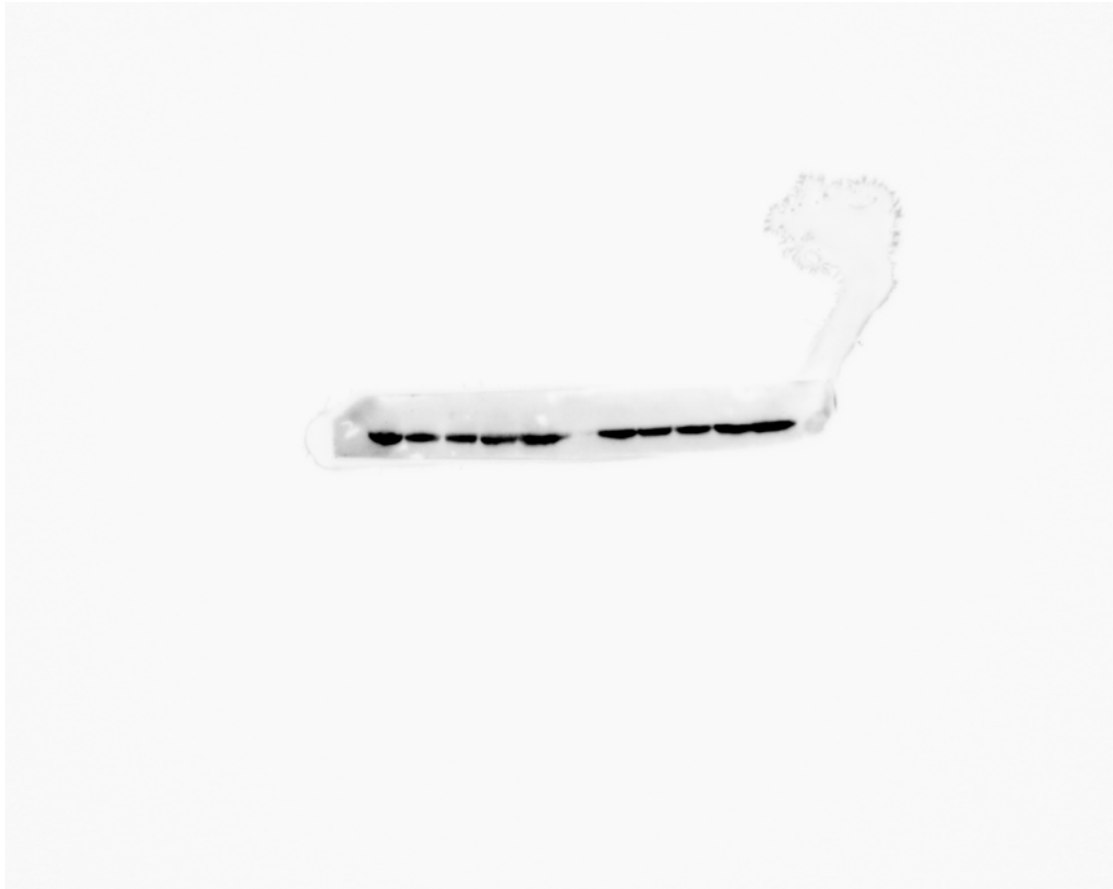

FKBP10

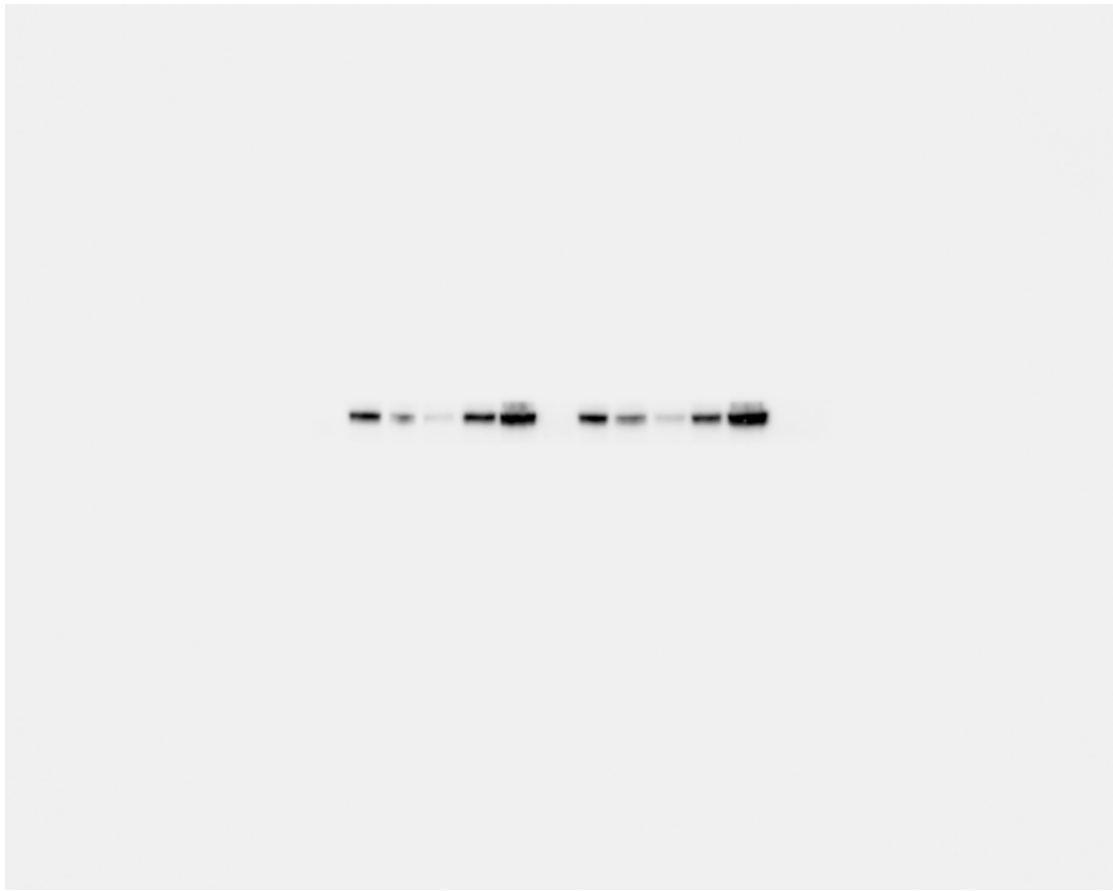

Fig. 3C  
FKBP10-786O

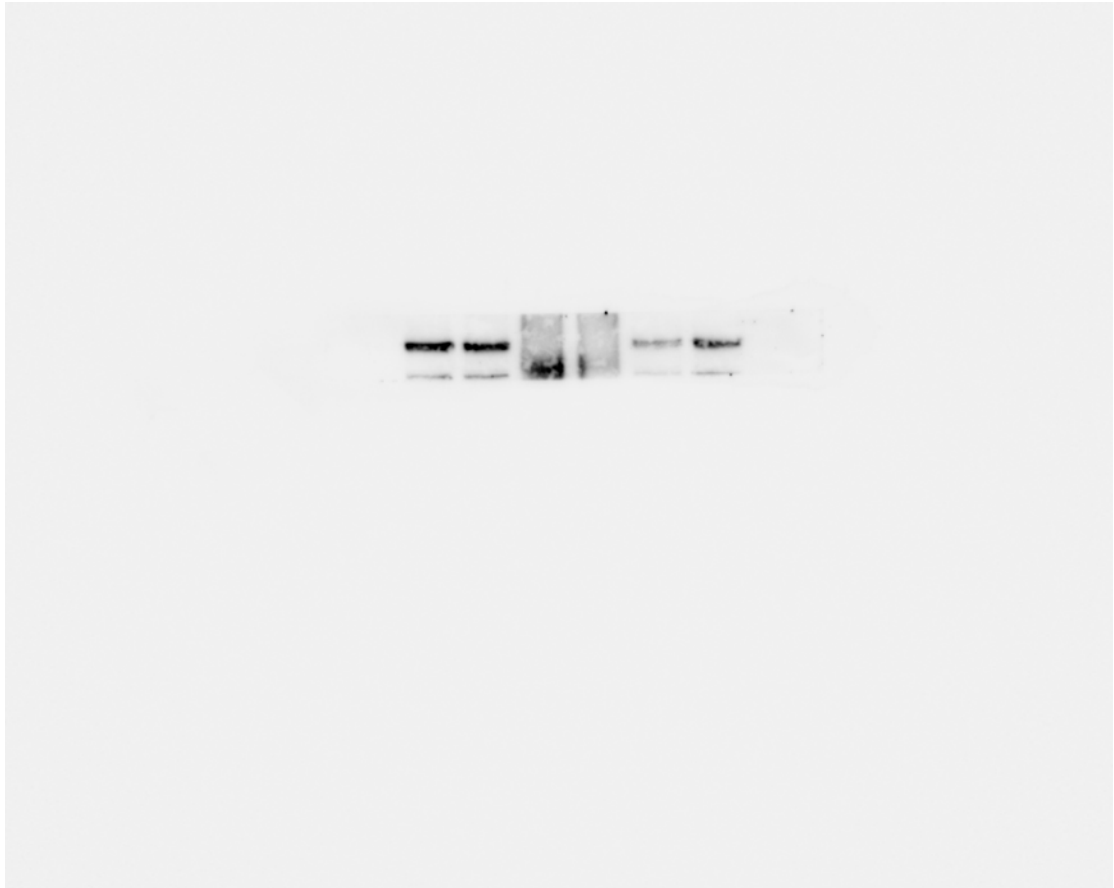

LDHA-786O

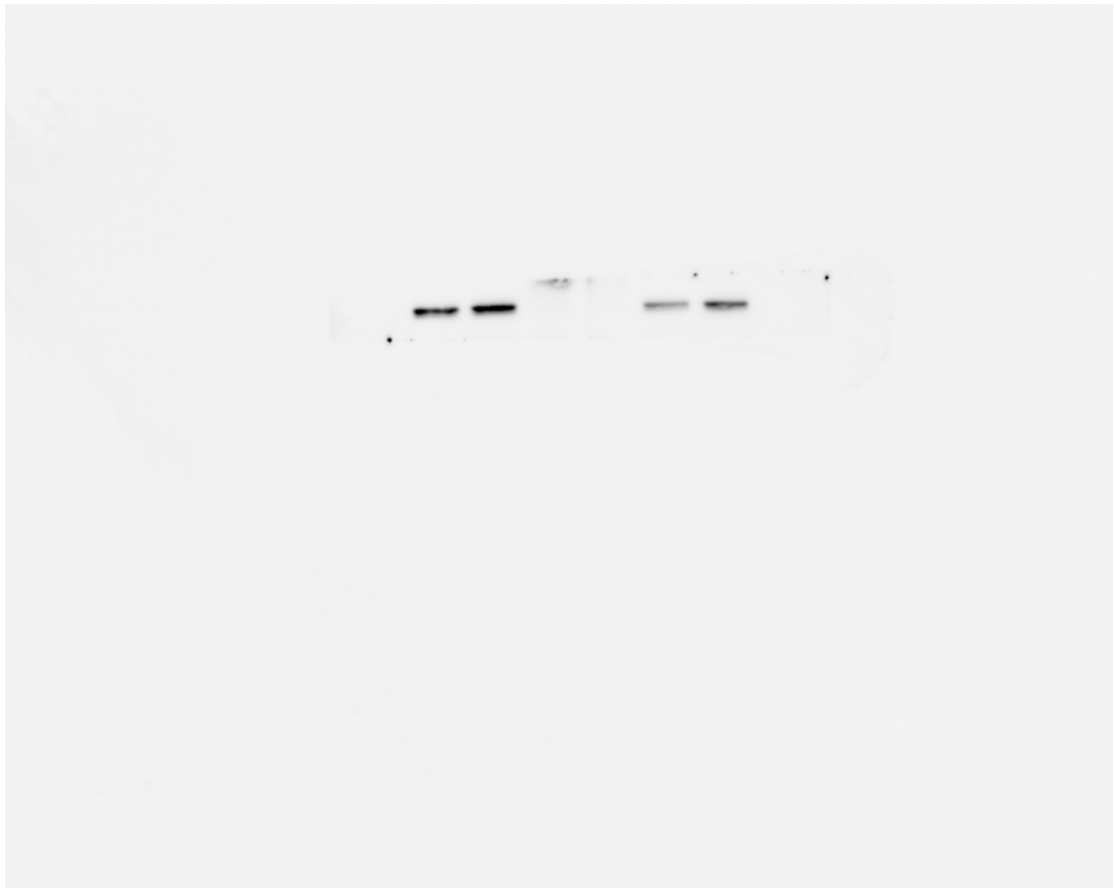

FKBP10-Caki1

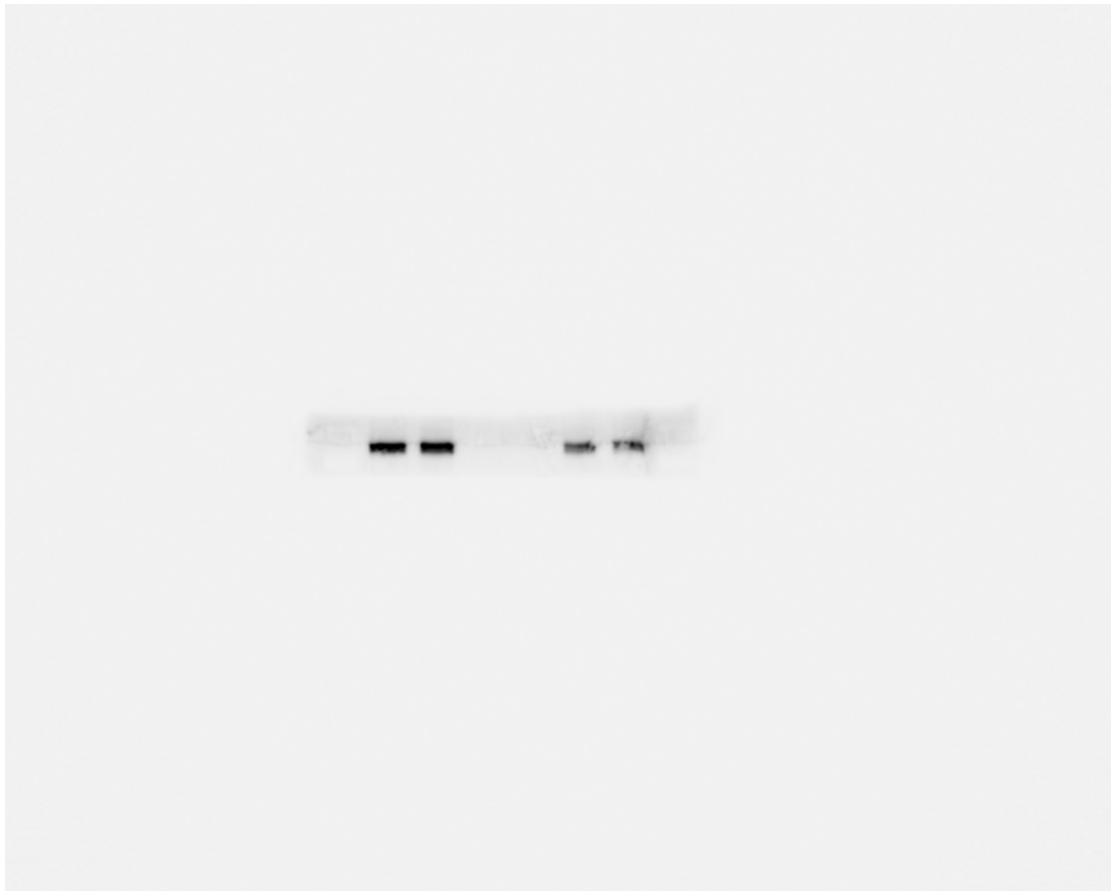

LDHA-Caki1



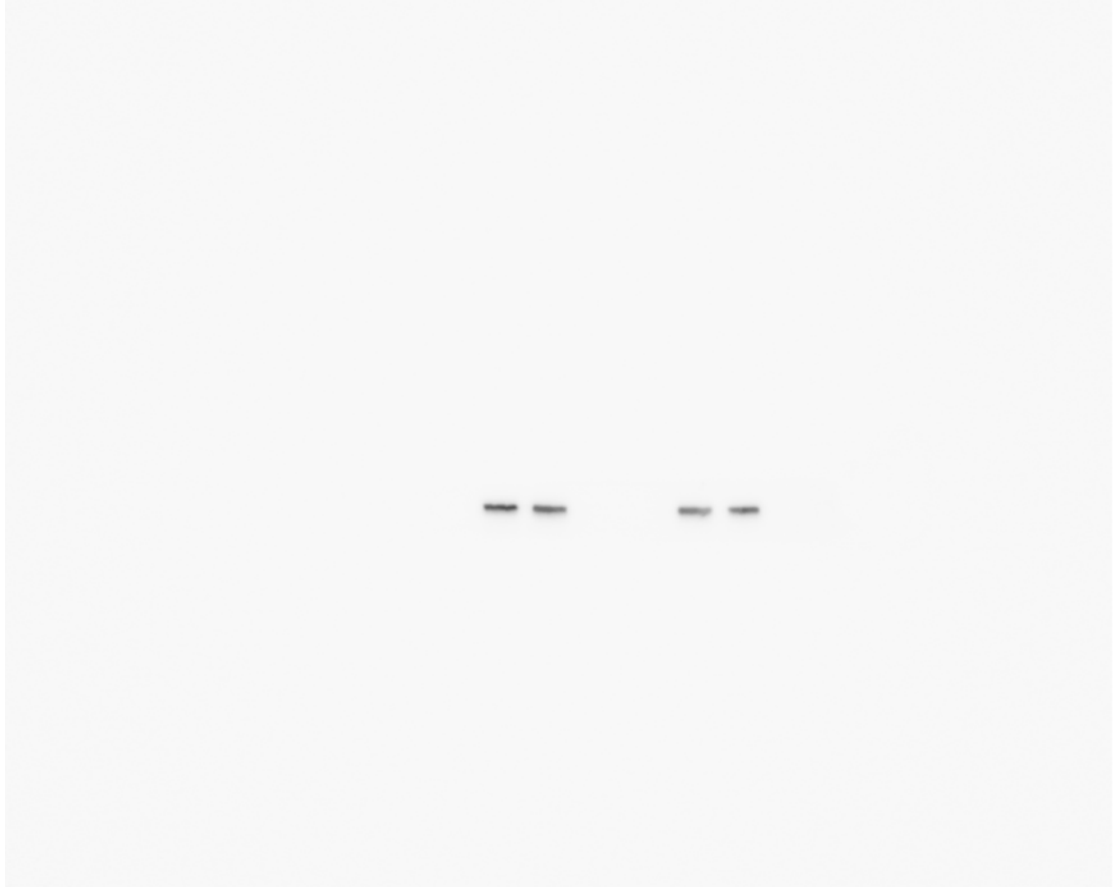

Fig. 3E

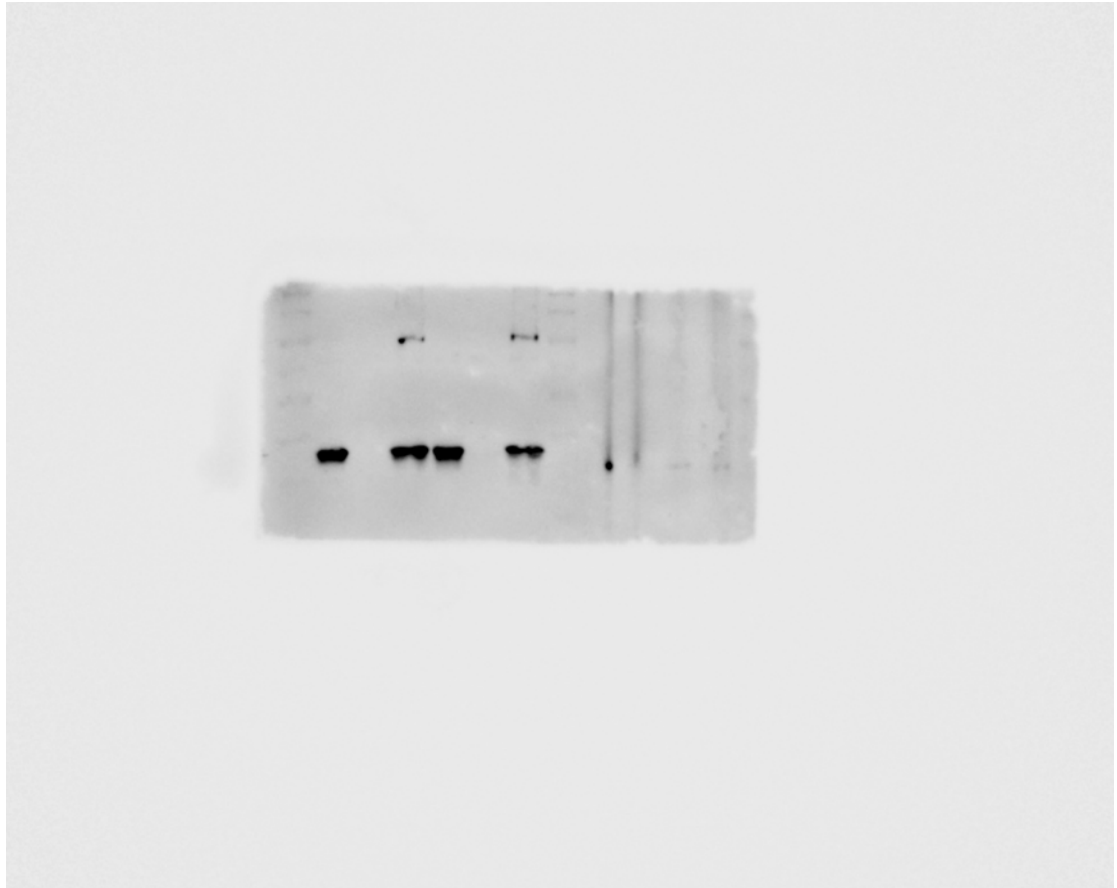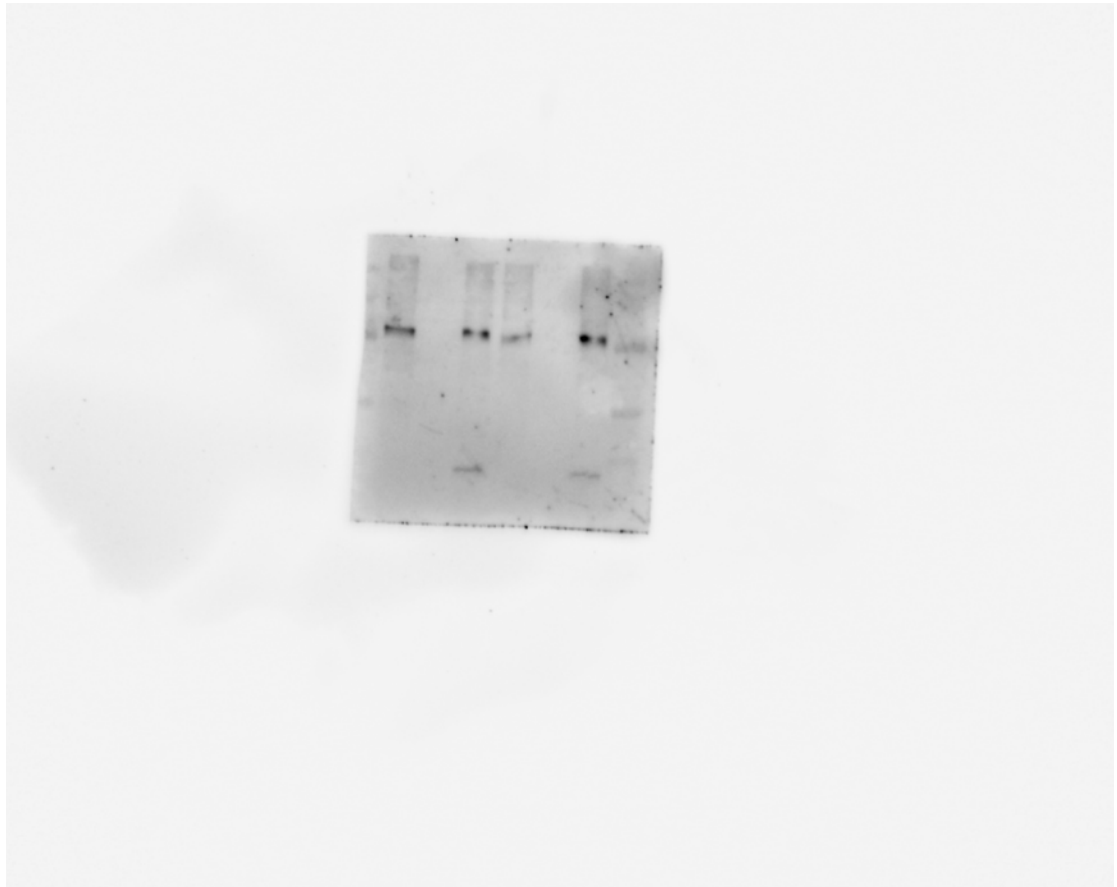

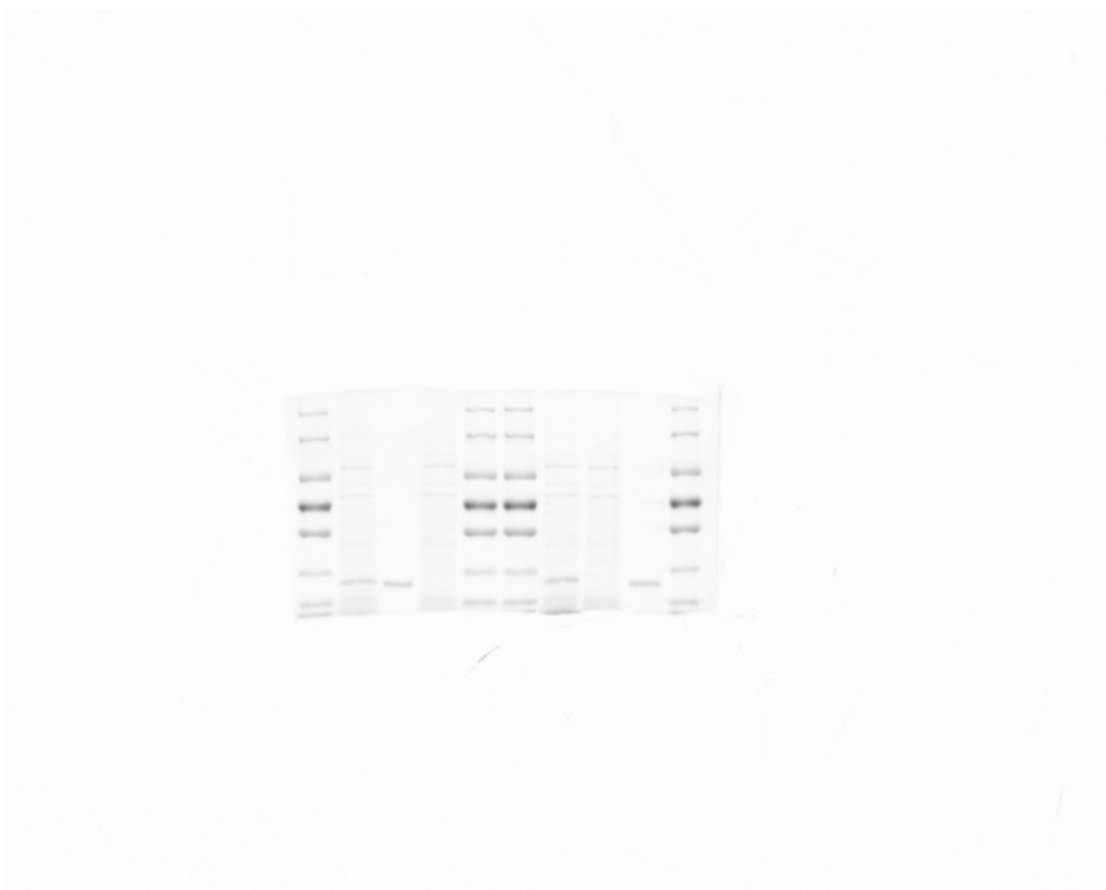

Fig. 3H

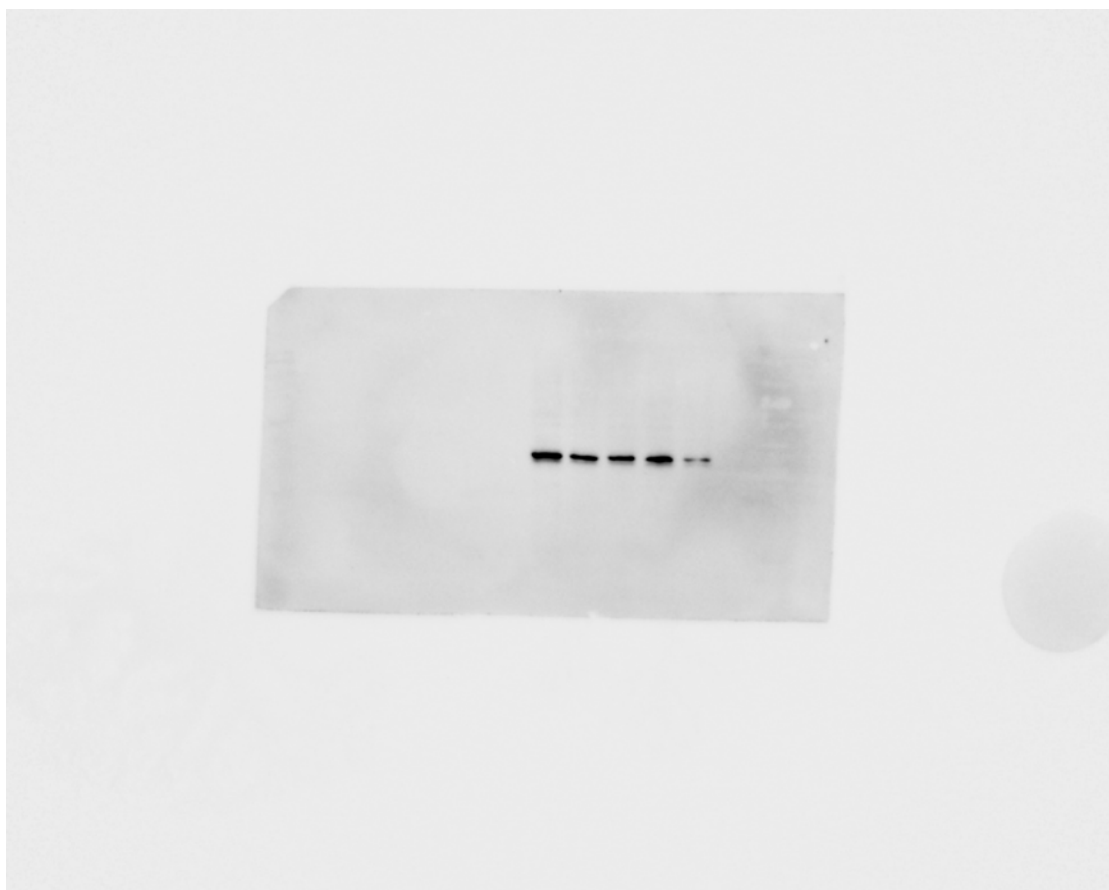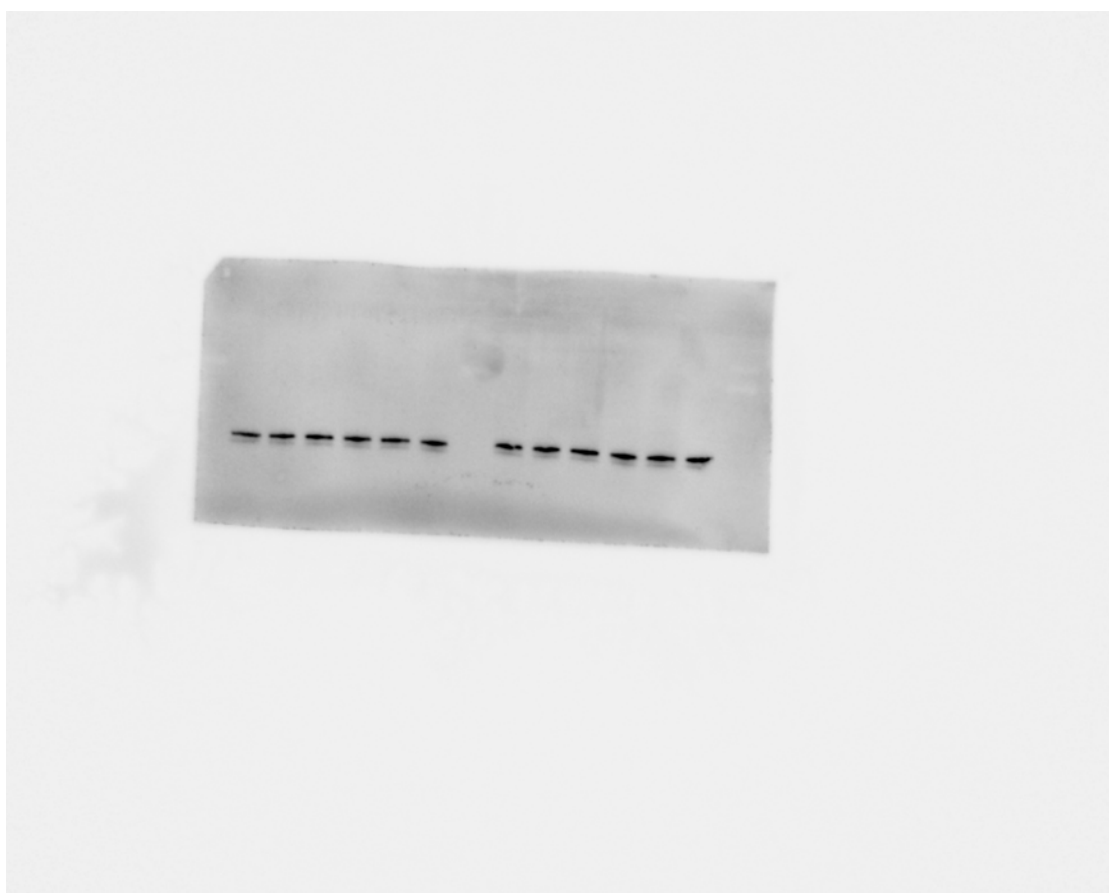

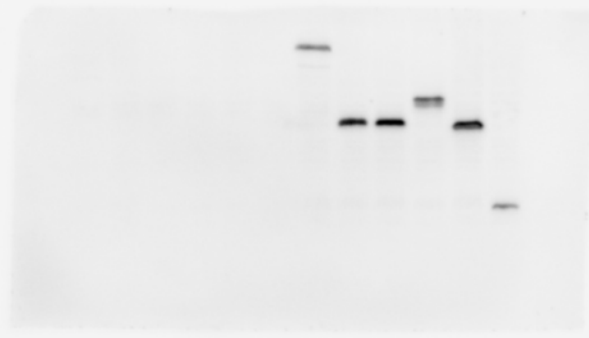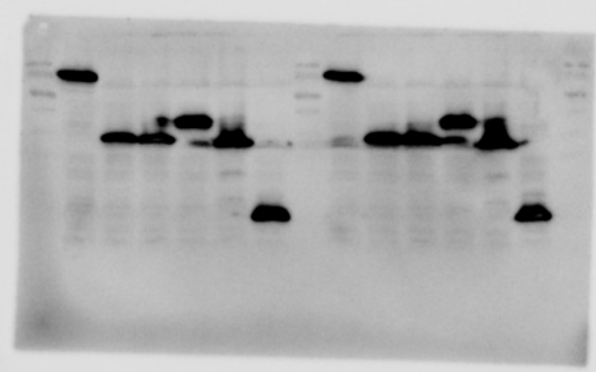

Fig. 3I

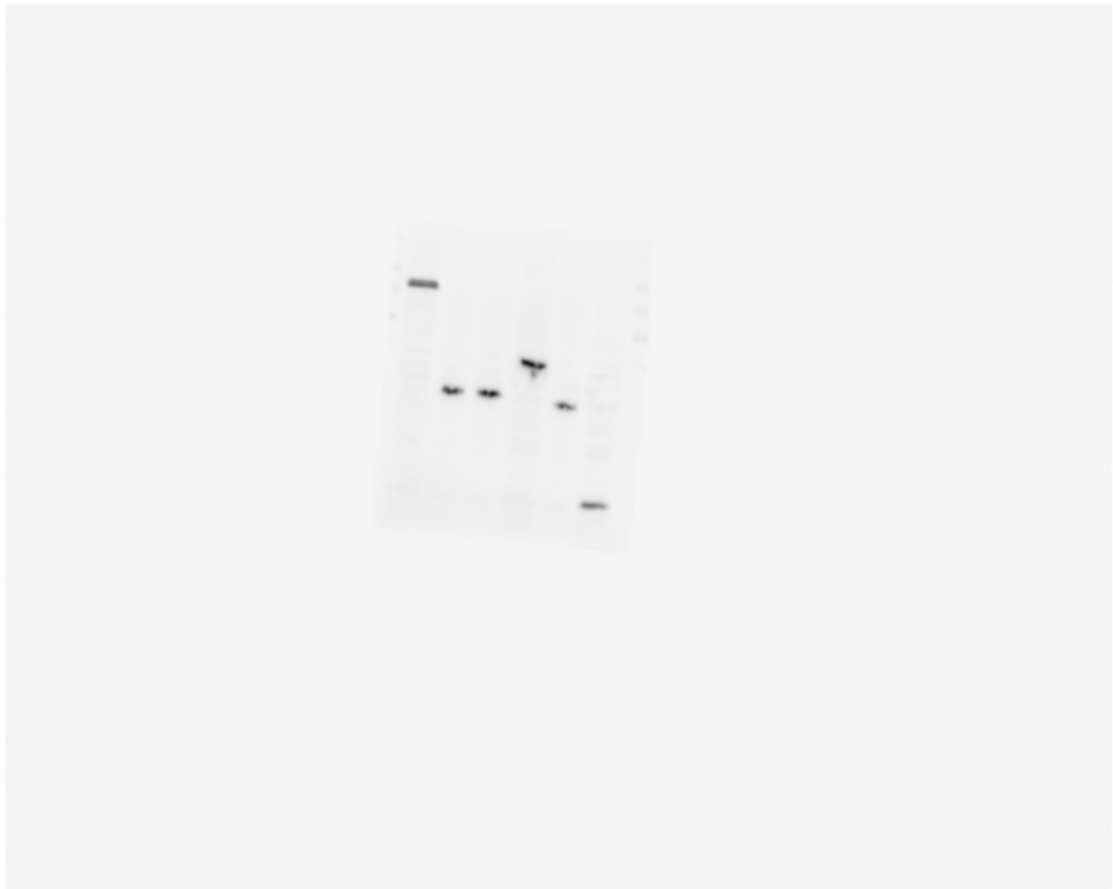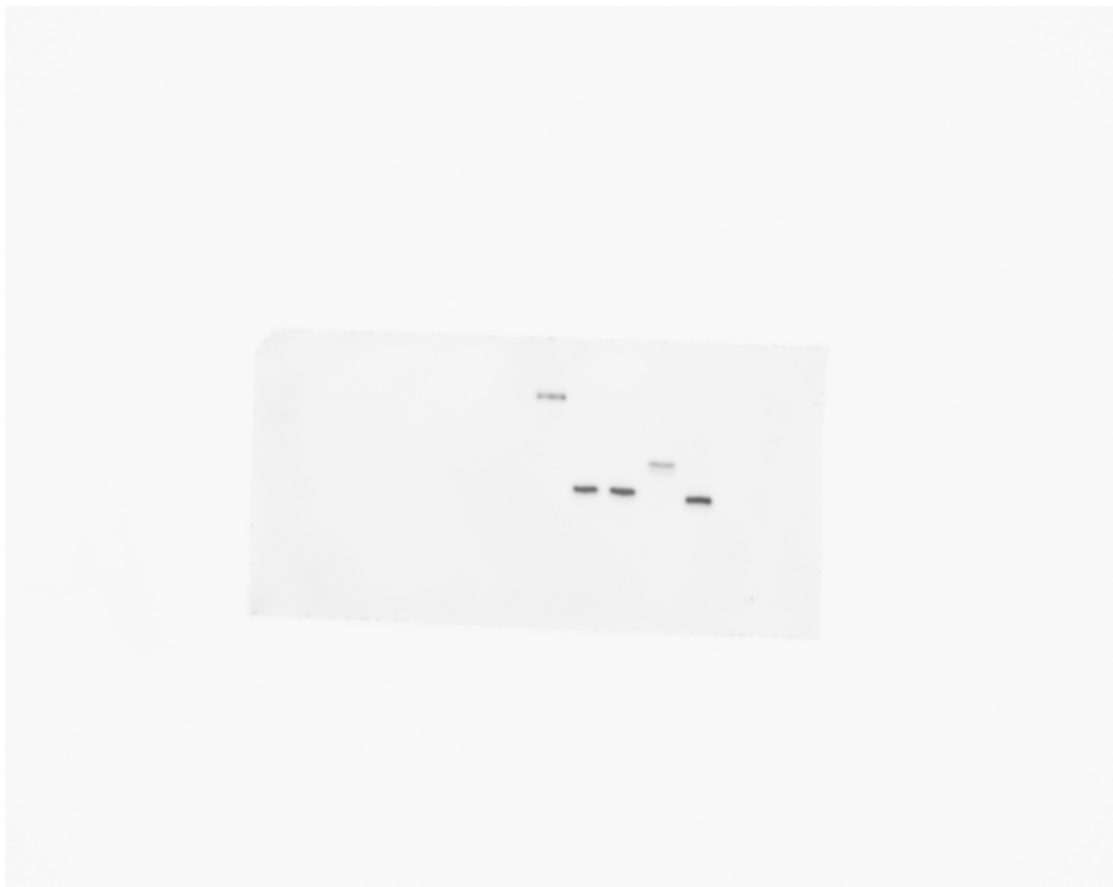

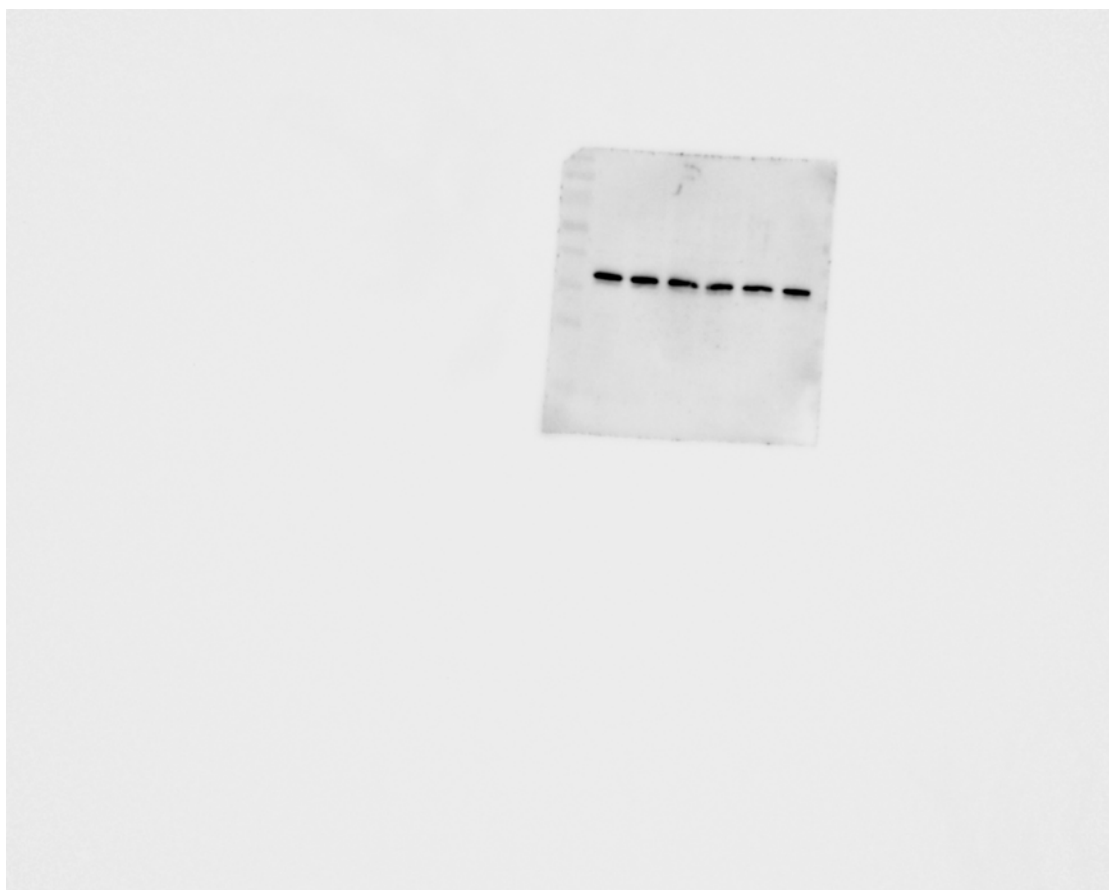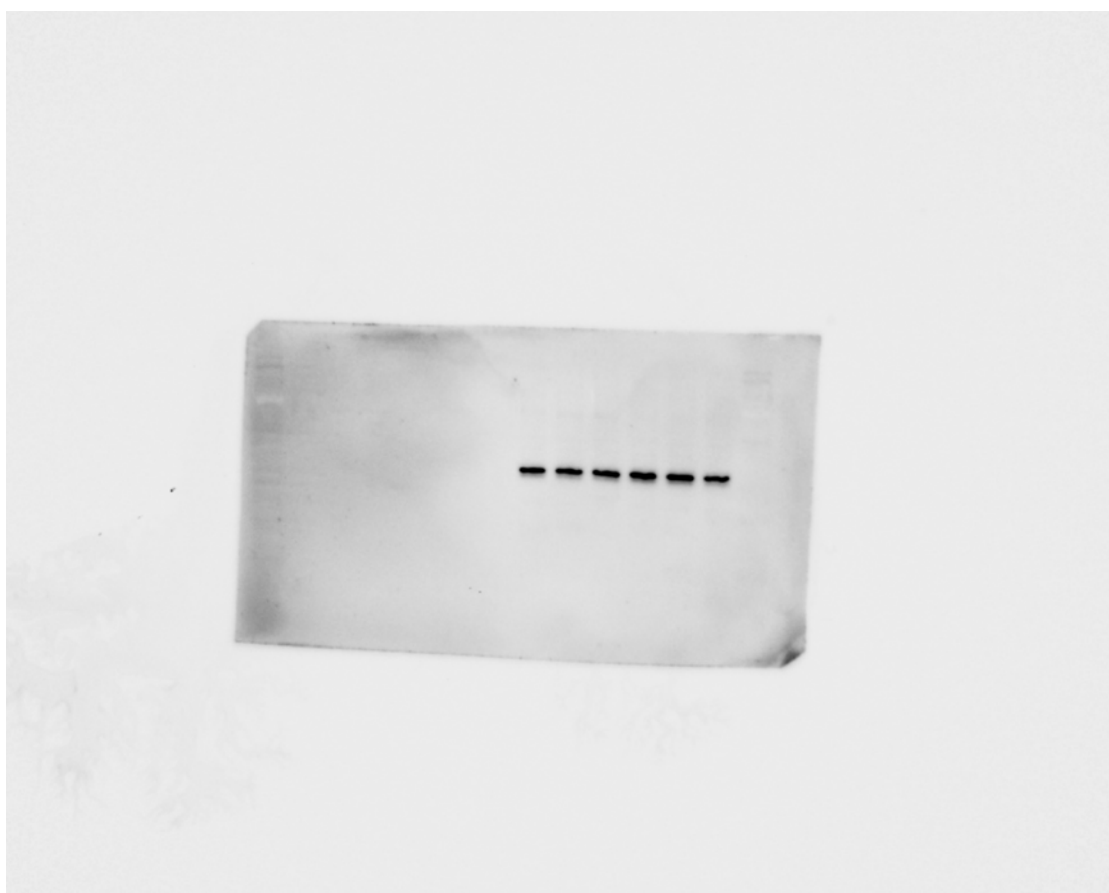

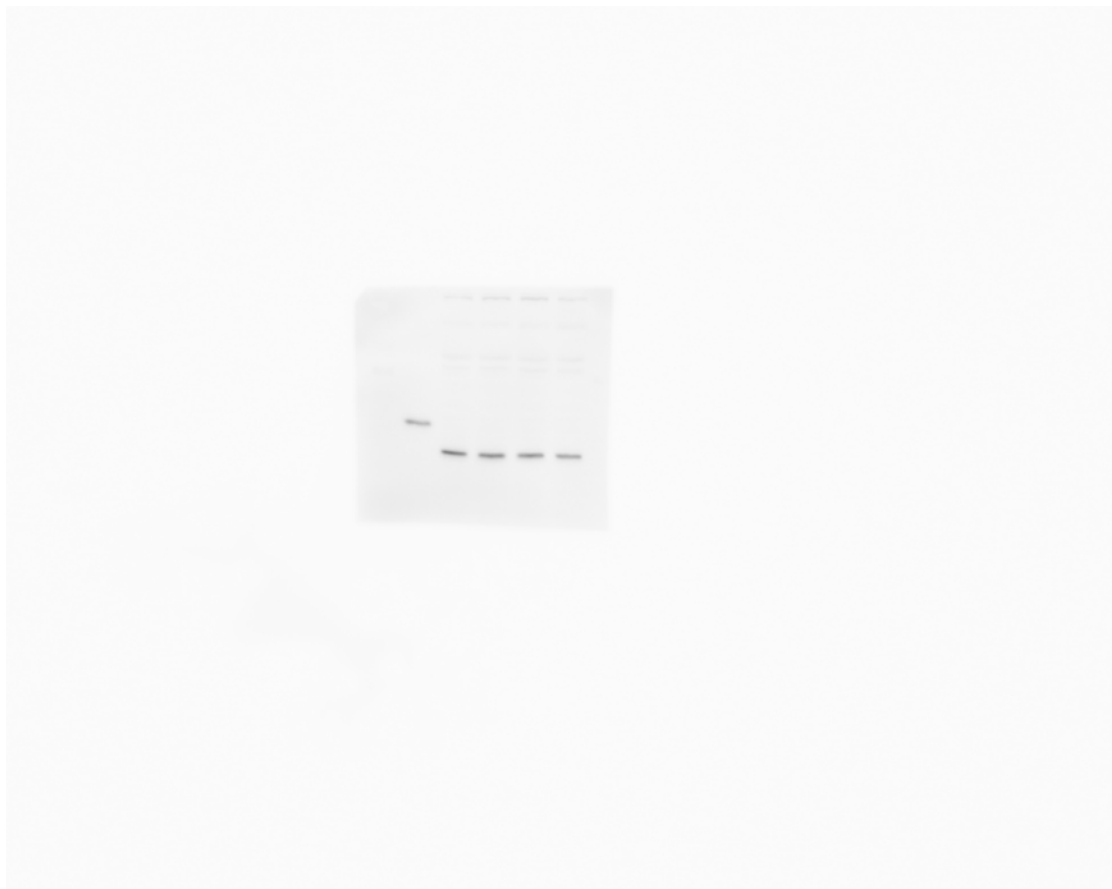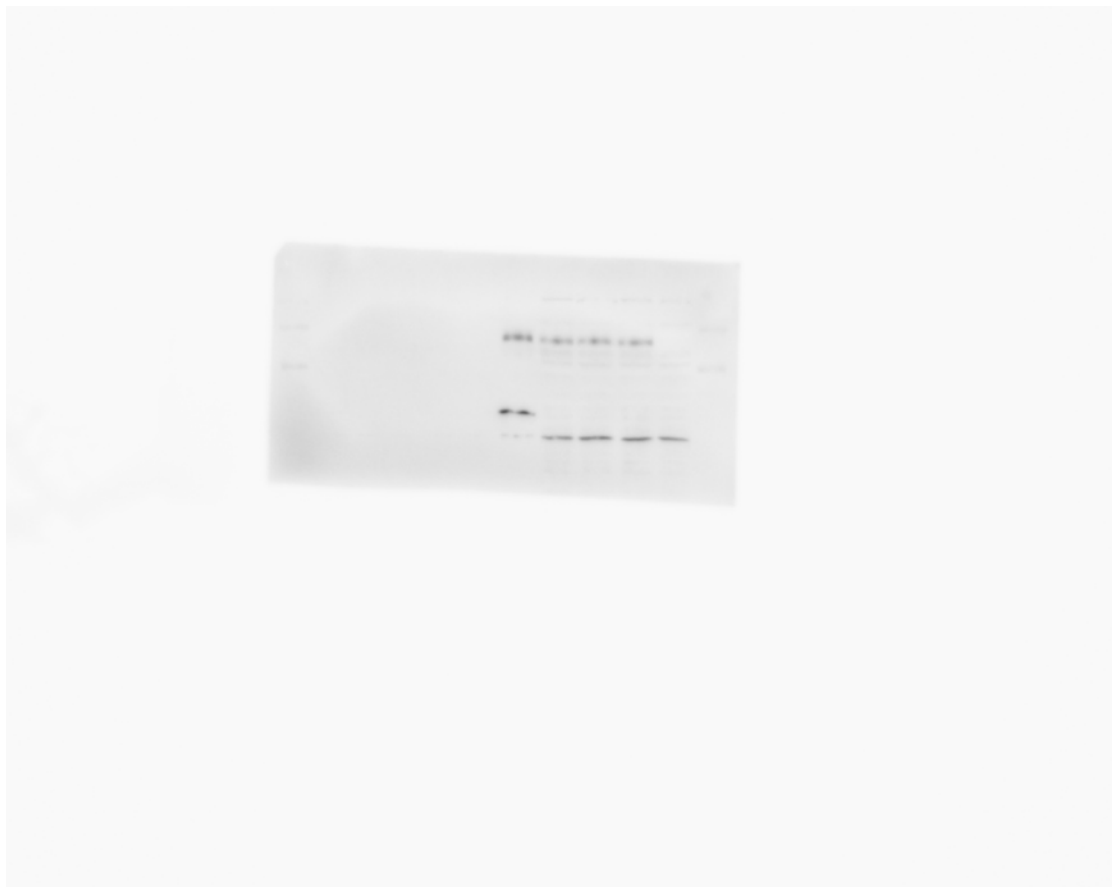



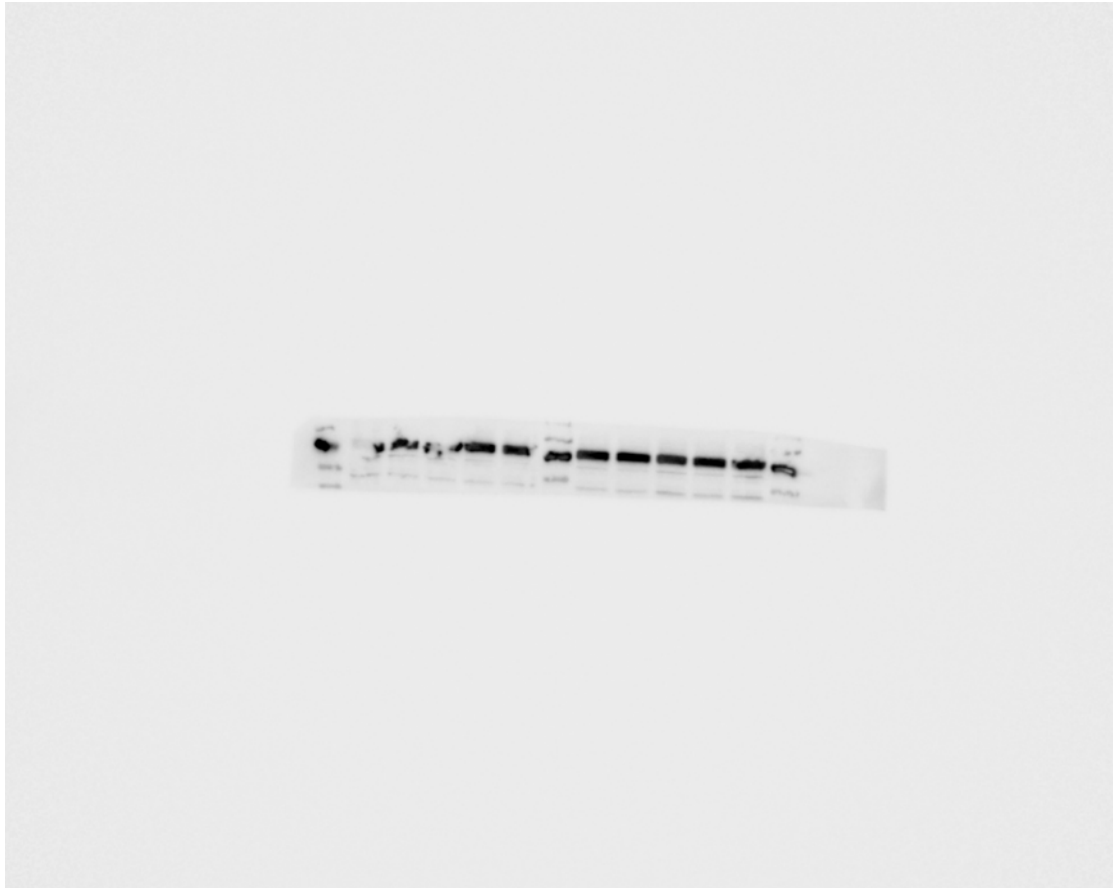

Fig. 3K

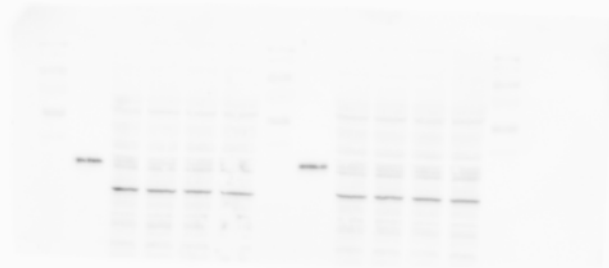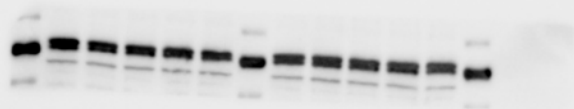

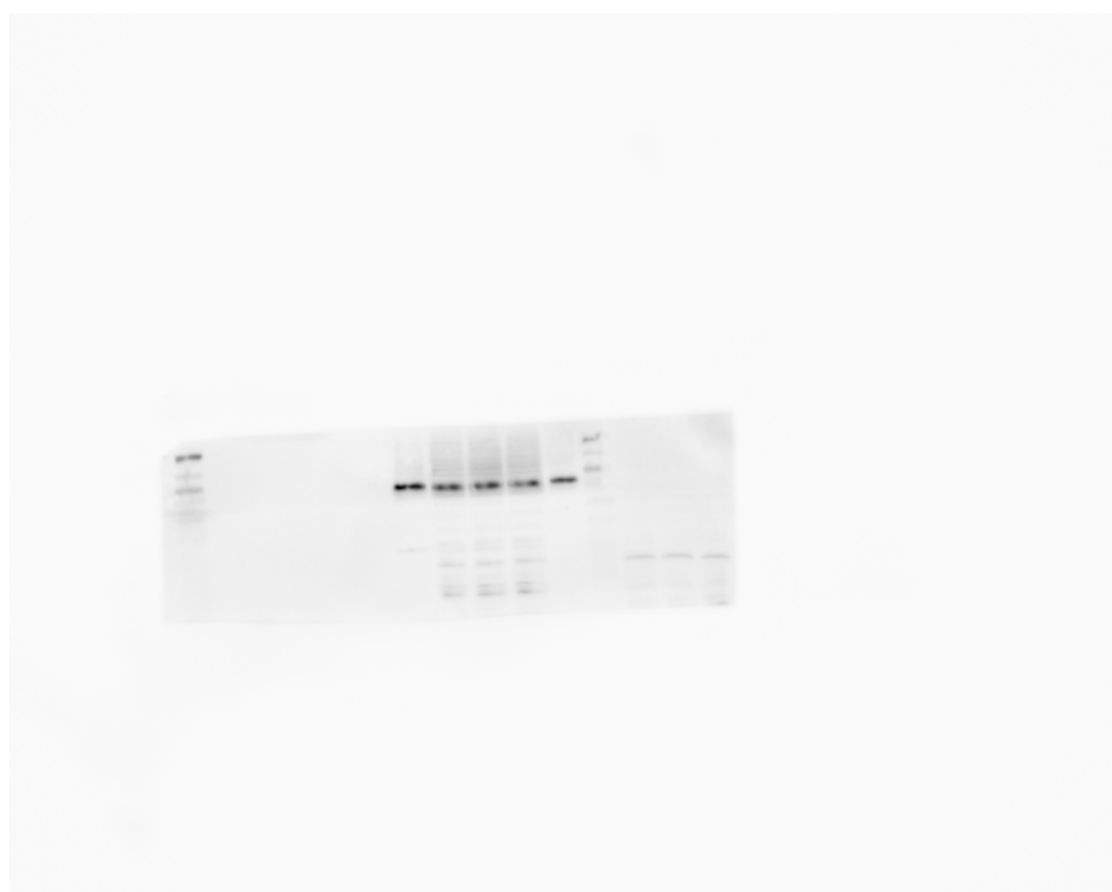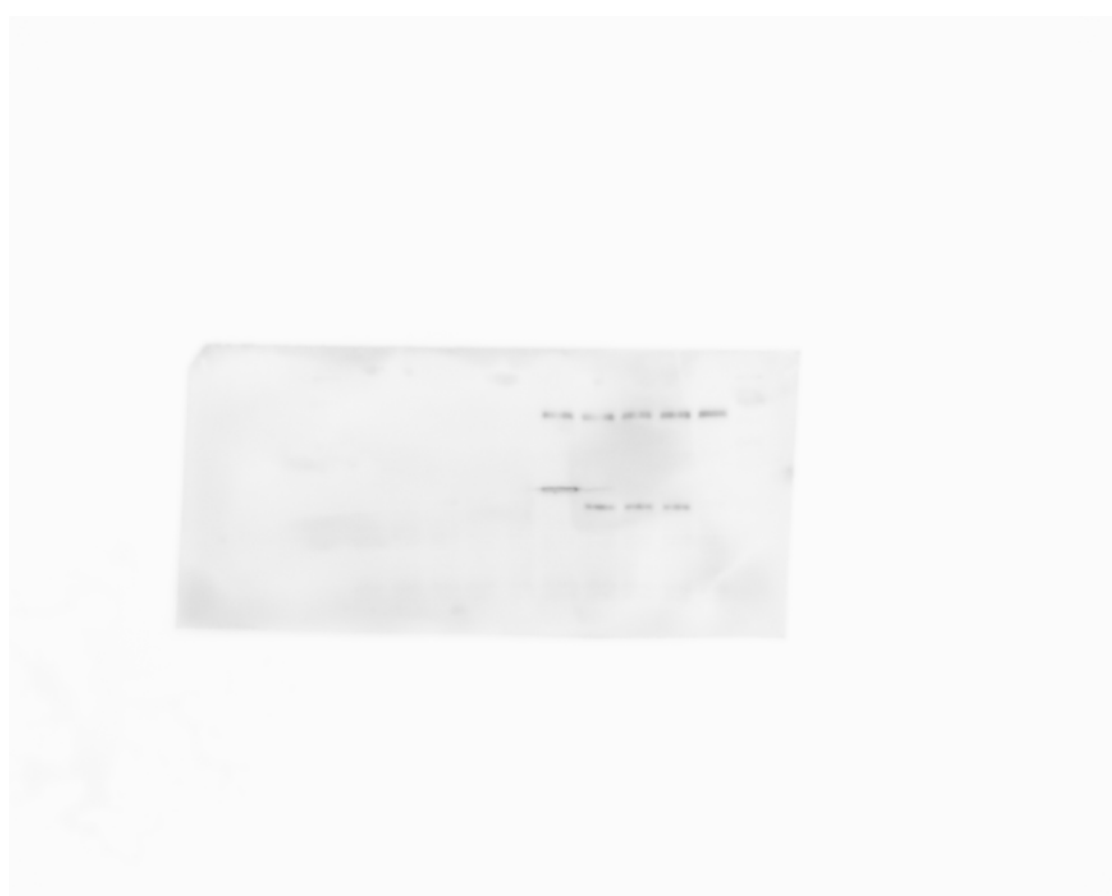

Fig. 4E

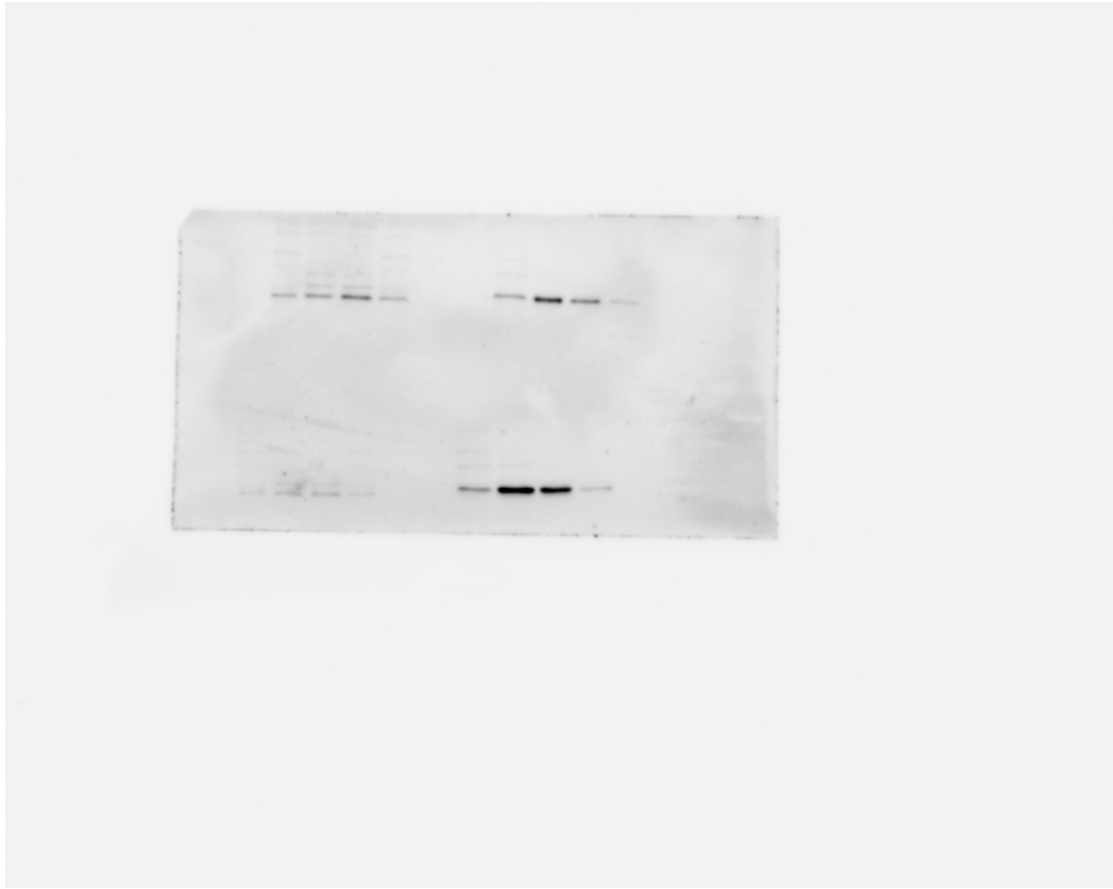

Fig. 4F  
LDHB

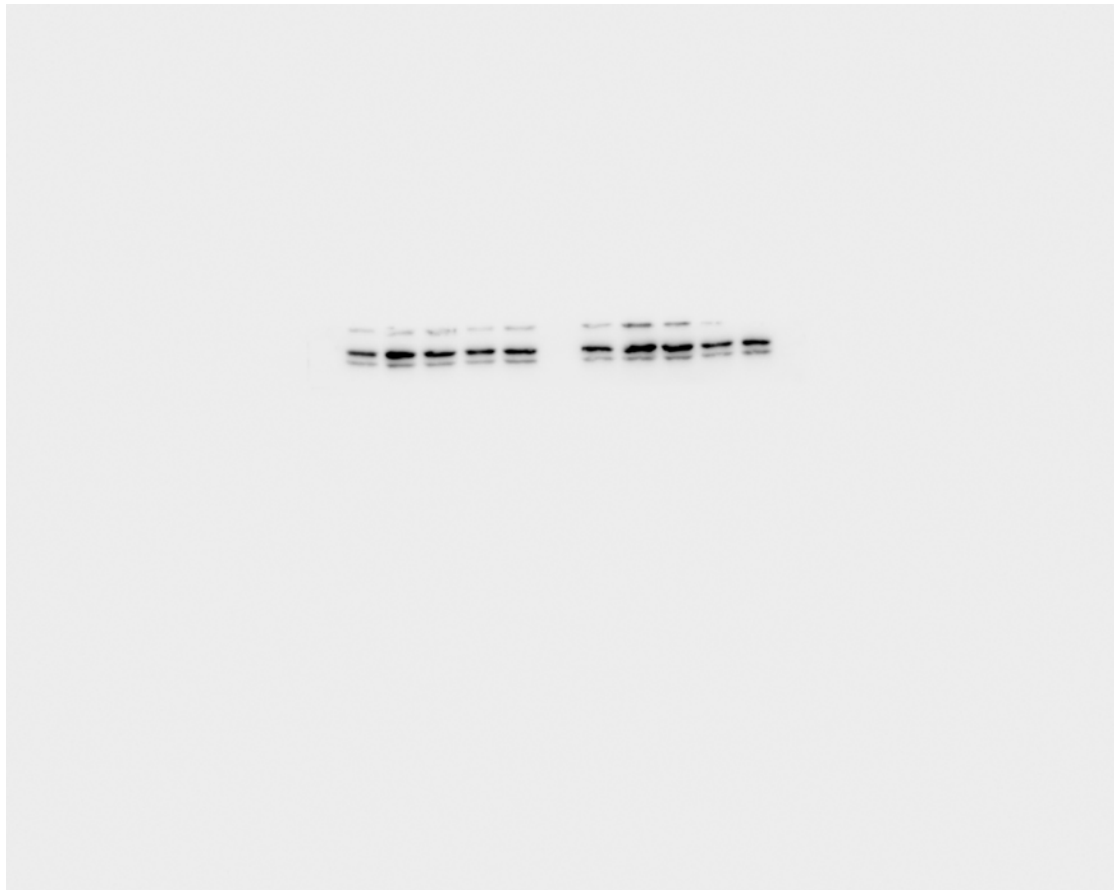

FGFR1

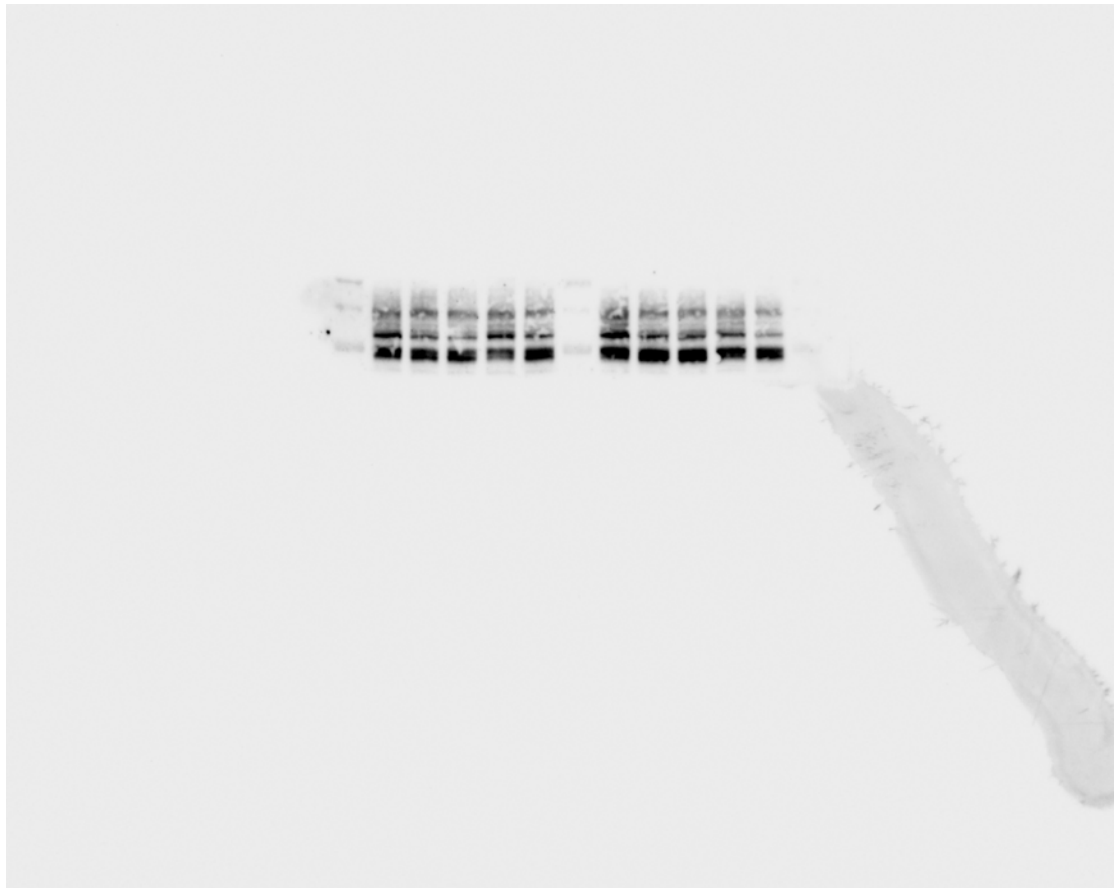

LDHA

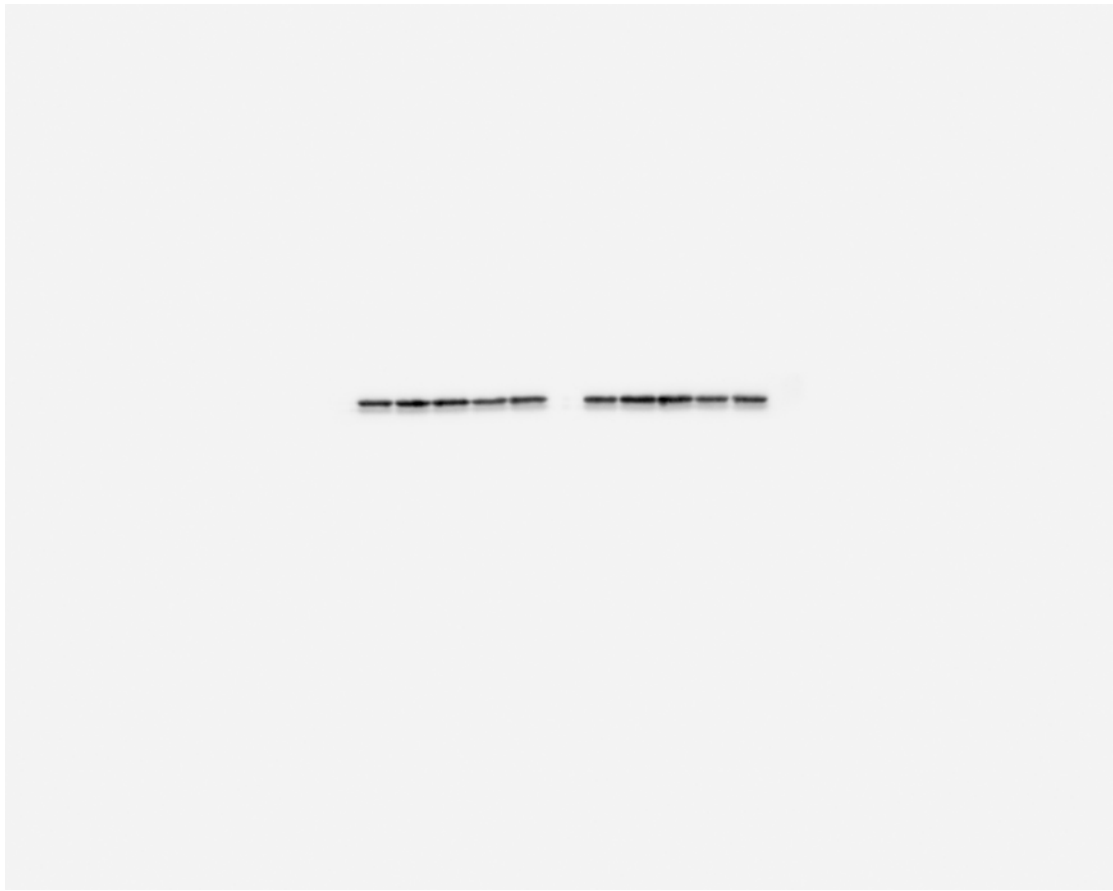

p-LDHA

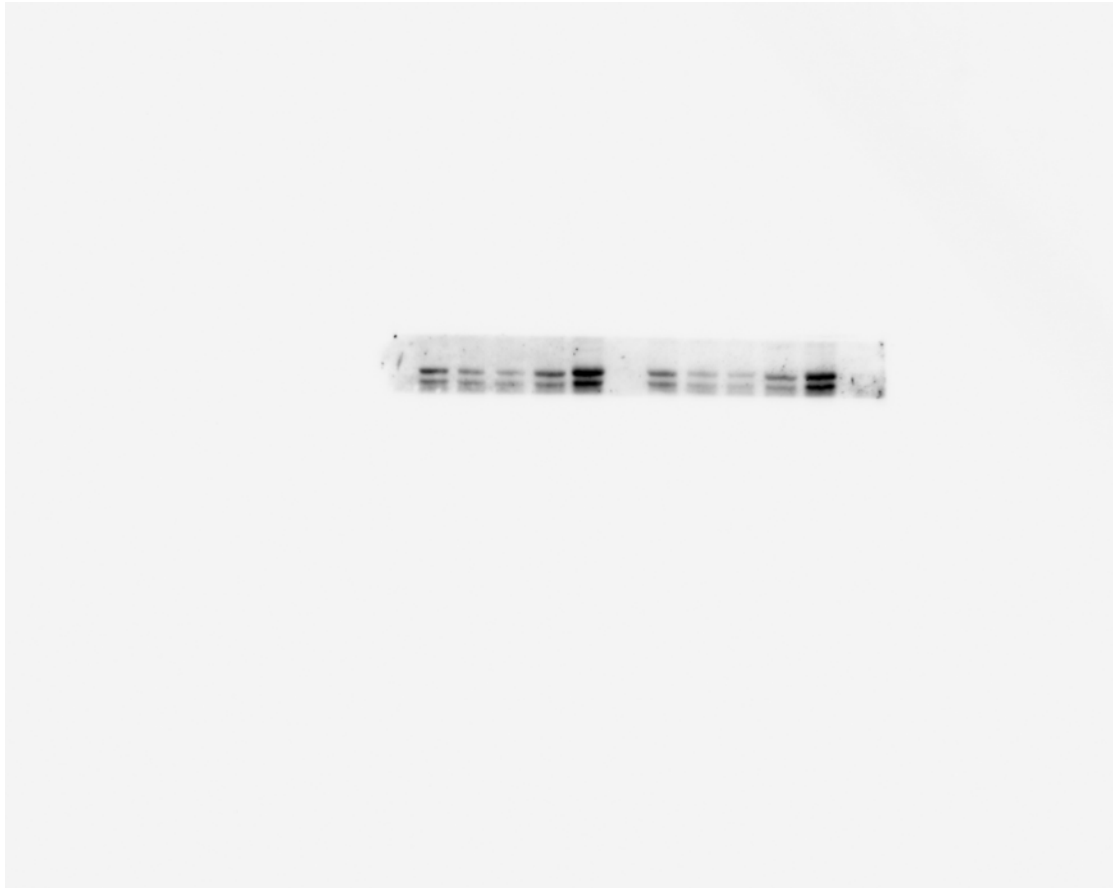

FKBP10

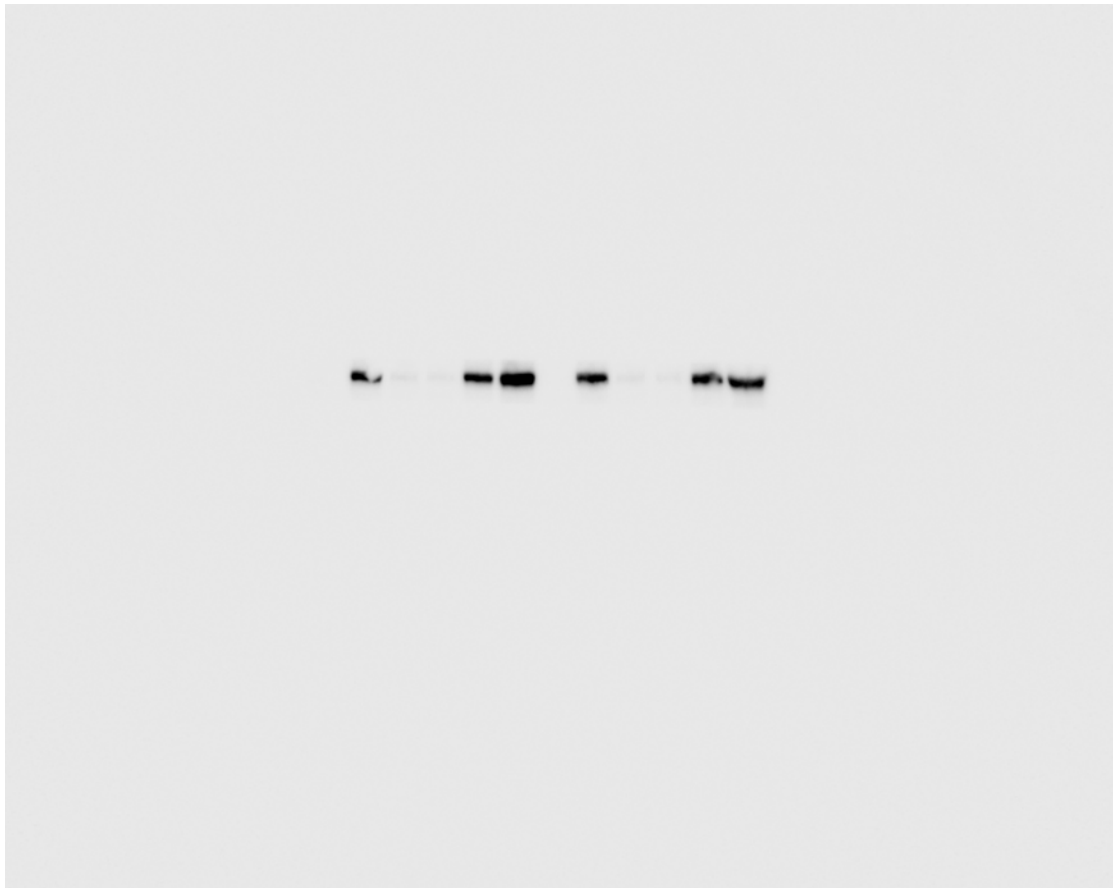

Actin

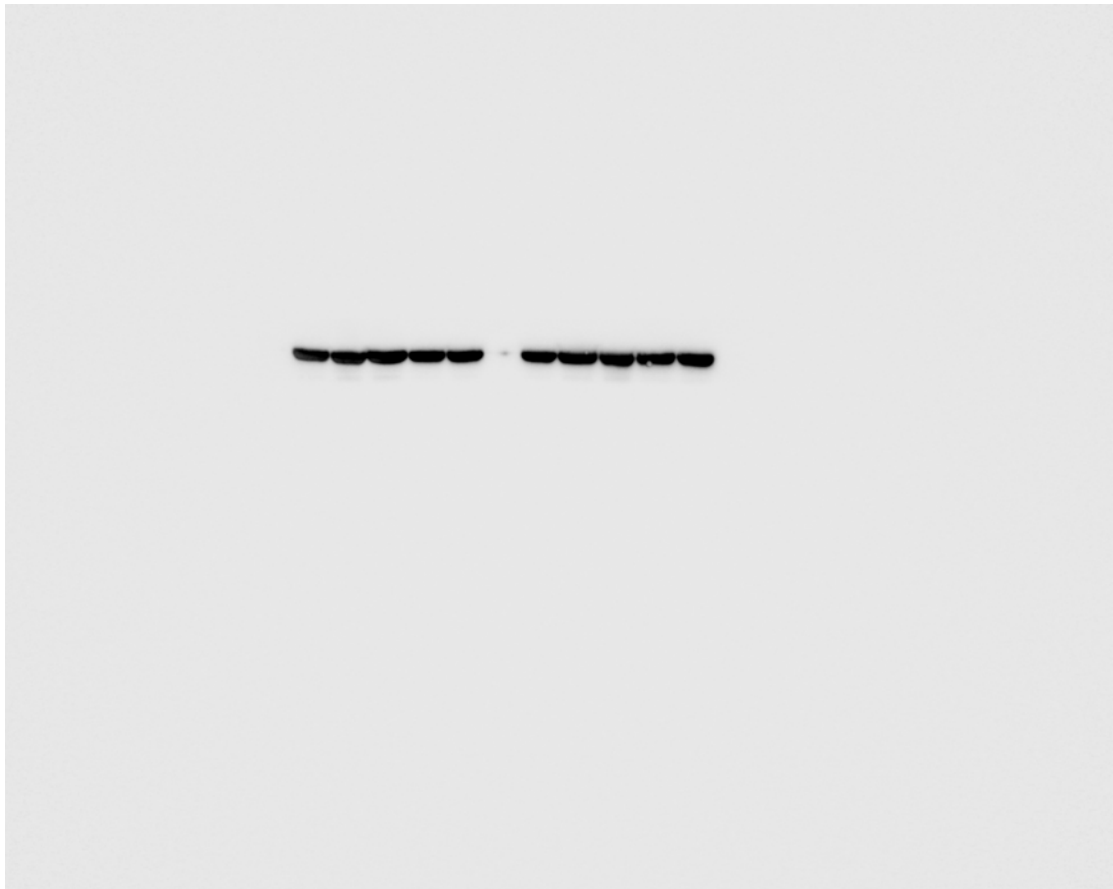

Fig. 4G  
Actin



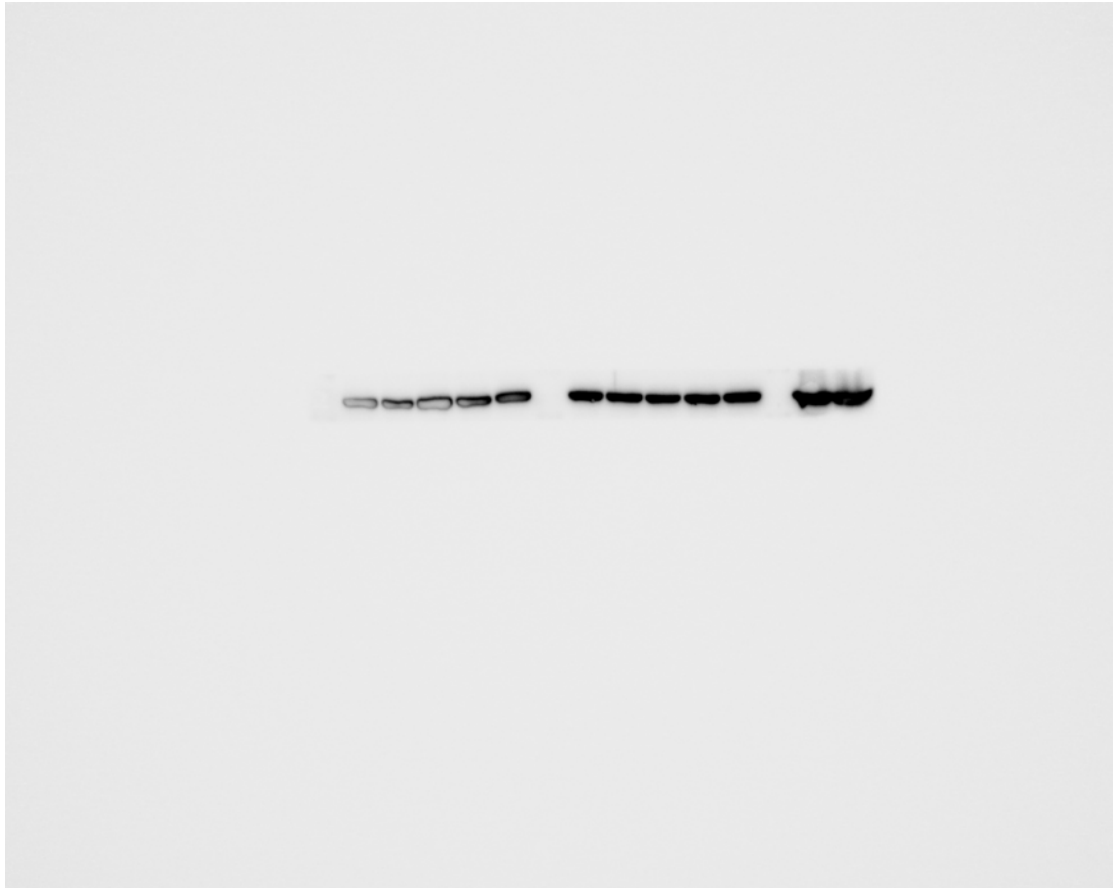

LDHB

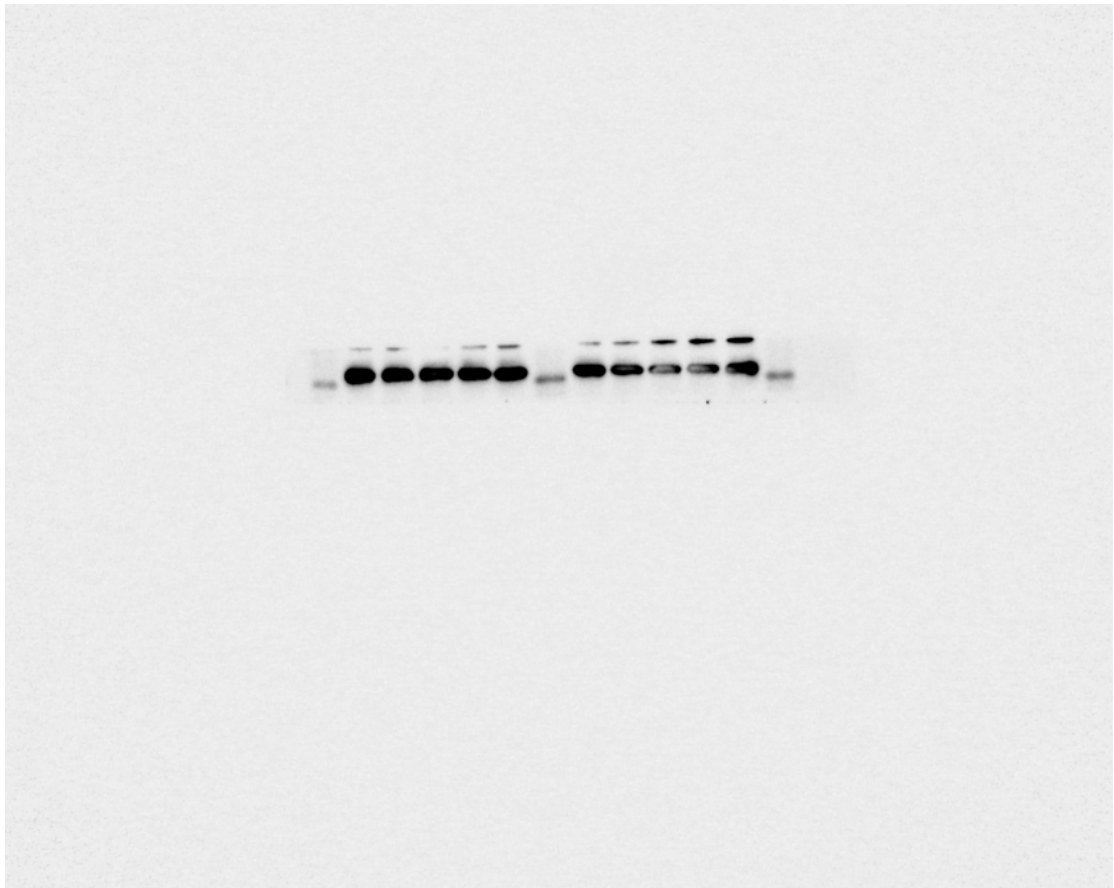

LDHA

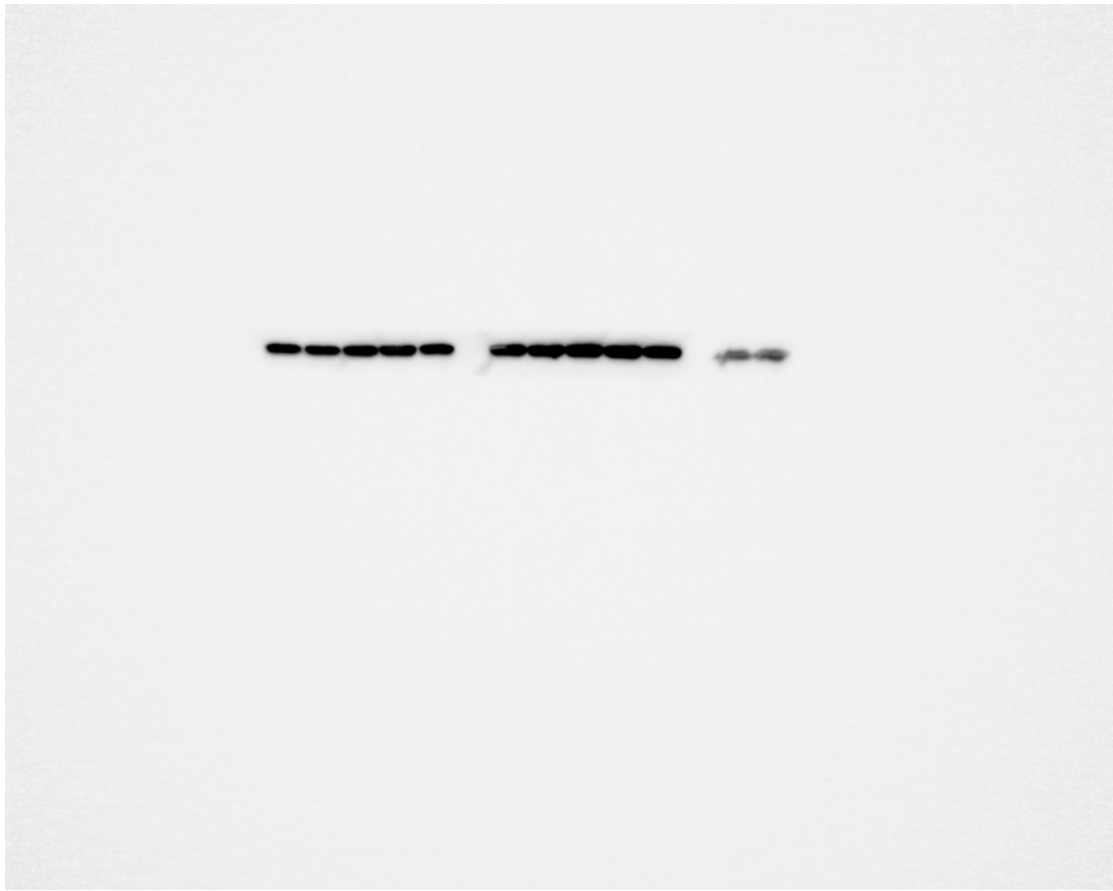

pLDHA

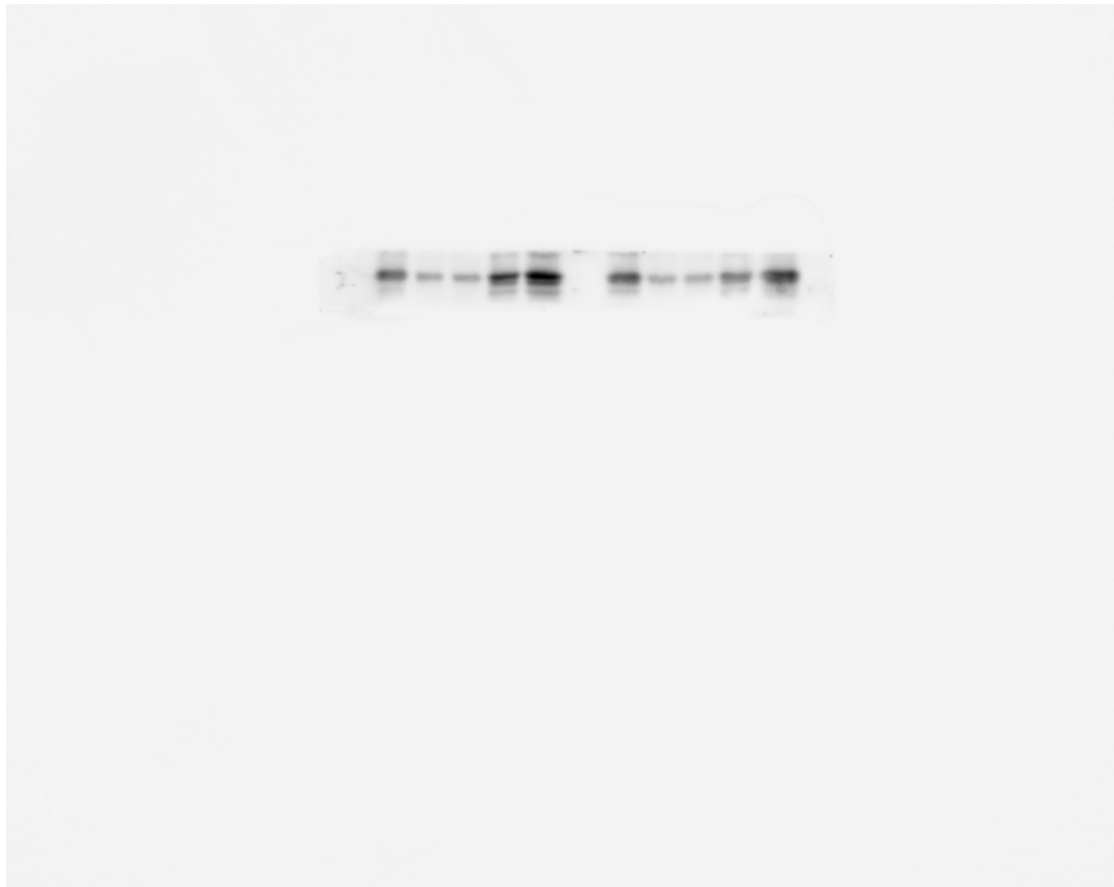

FKBP10

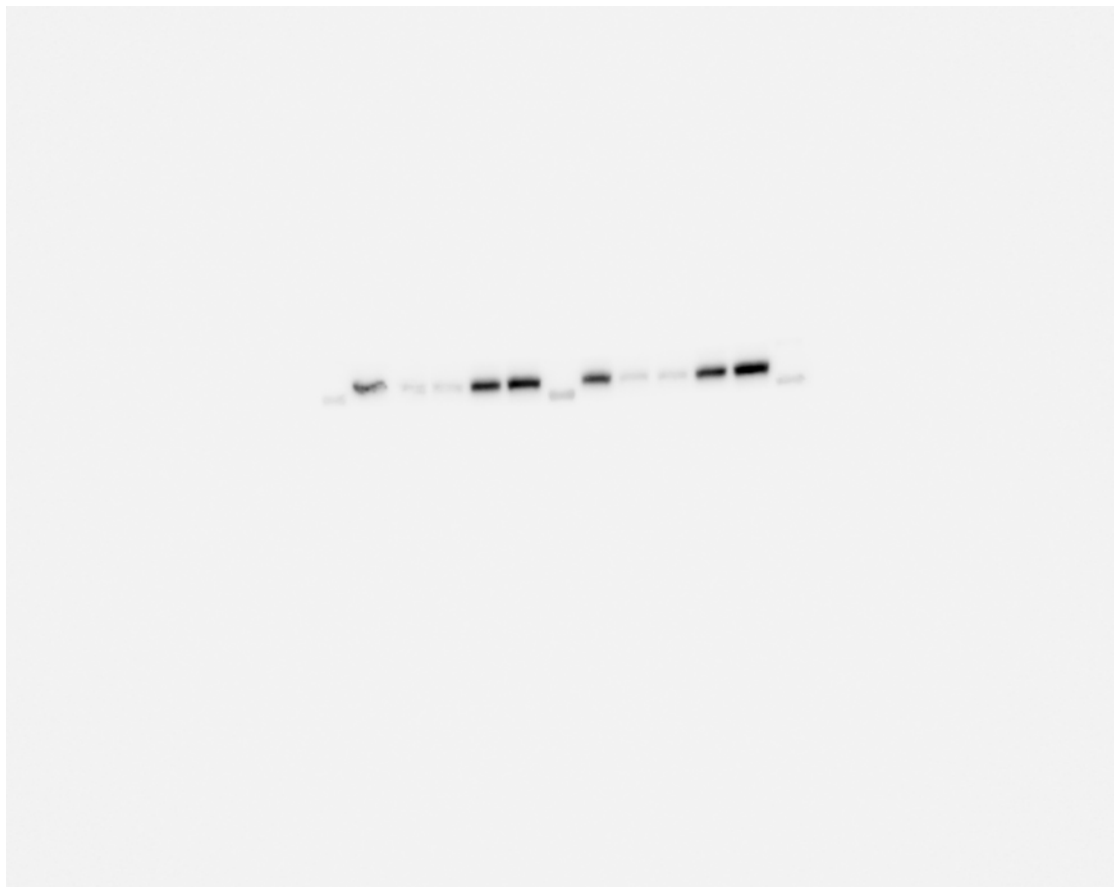

FGFR1

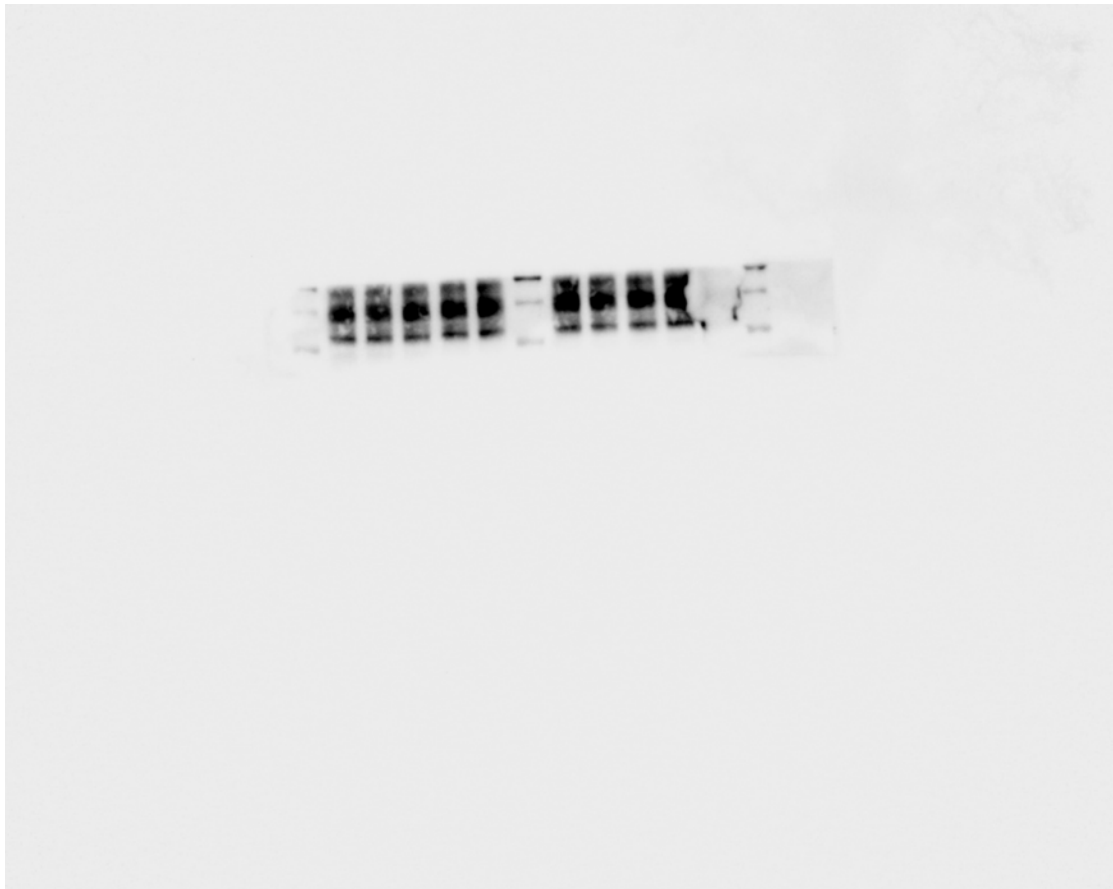

Fig. 4H  
Actin

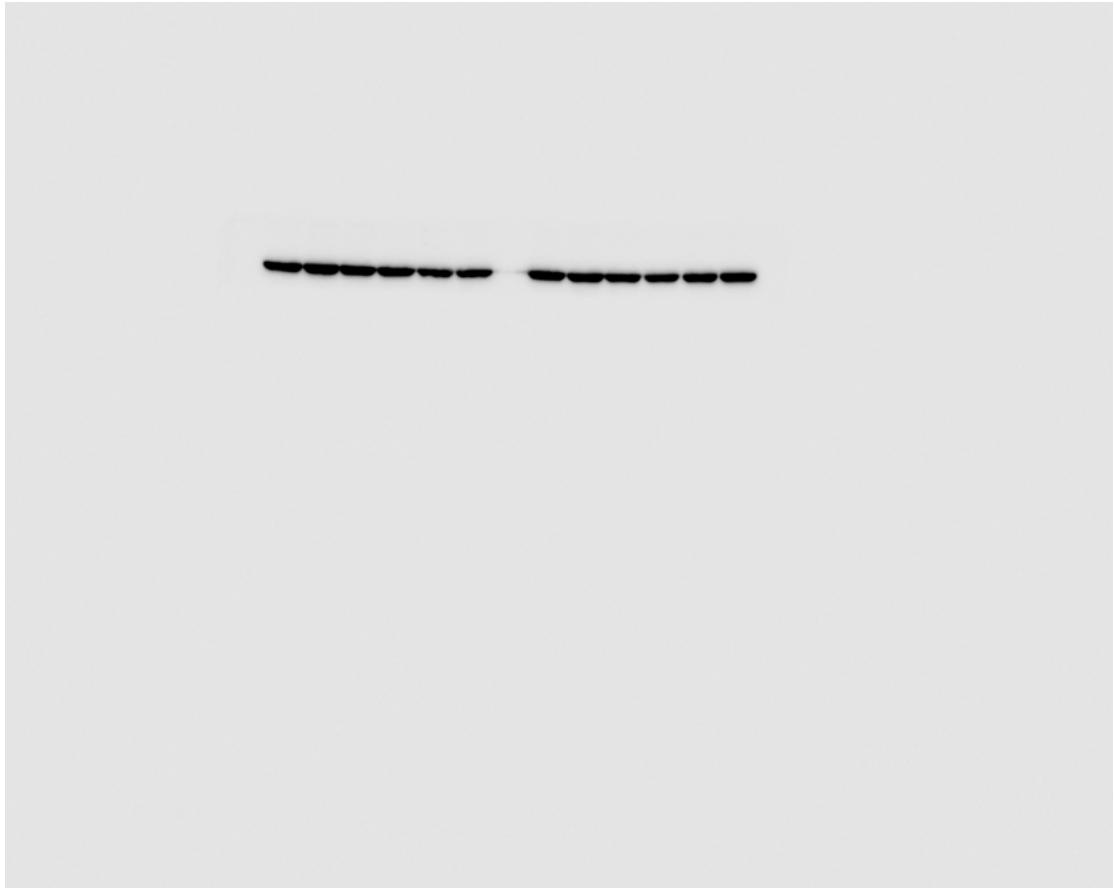

LDHA

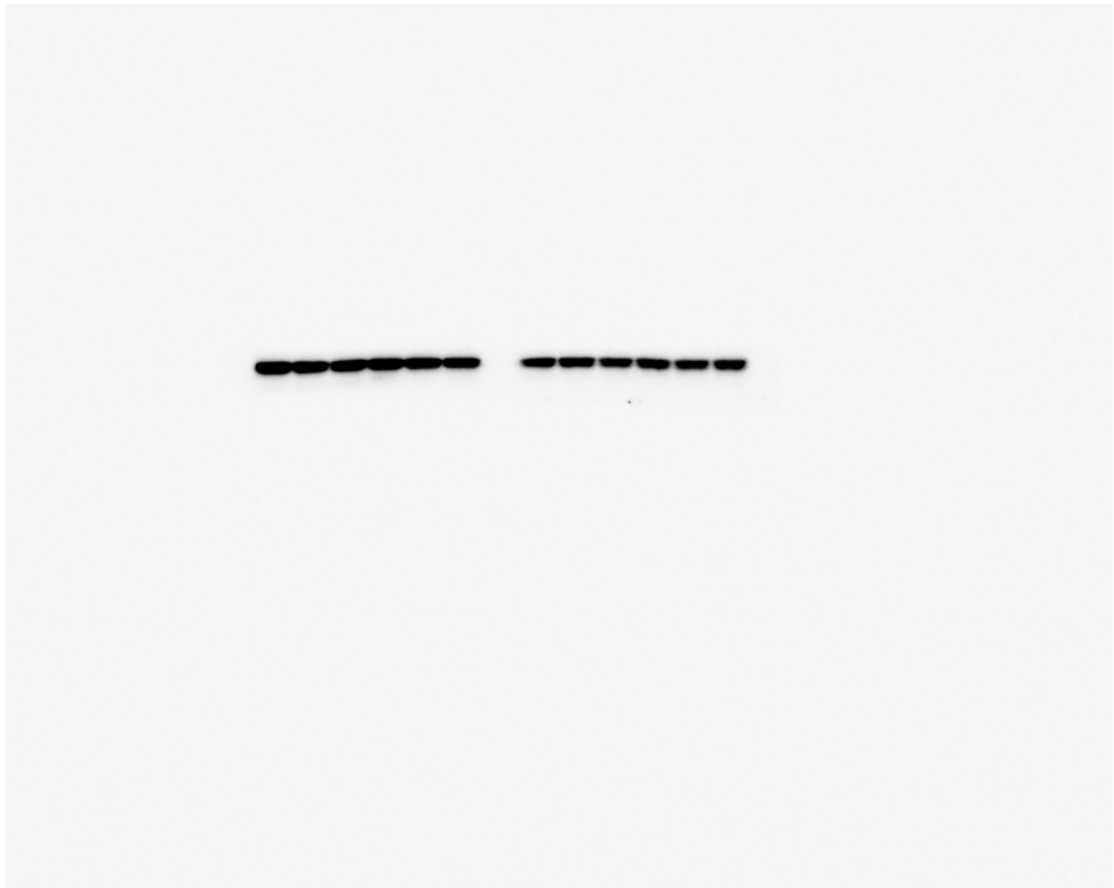

pLDHA

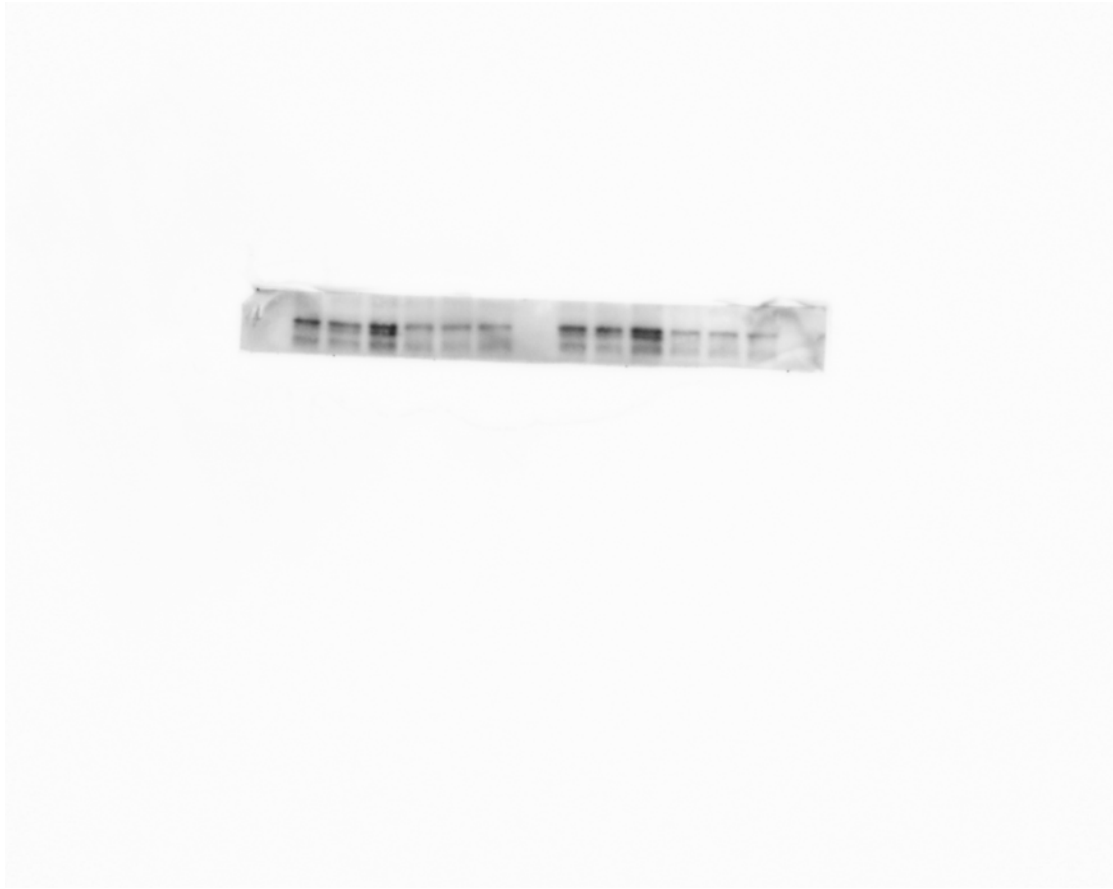

FKBP10

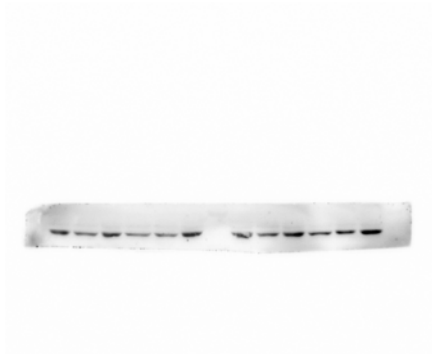

FGFR1

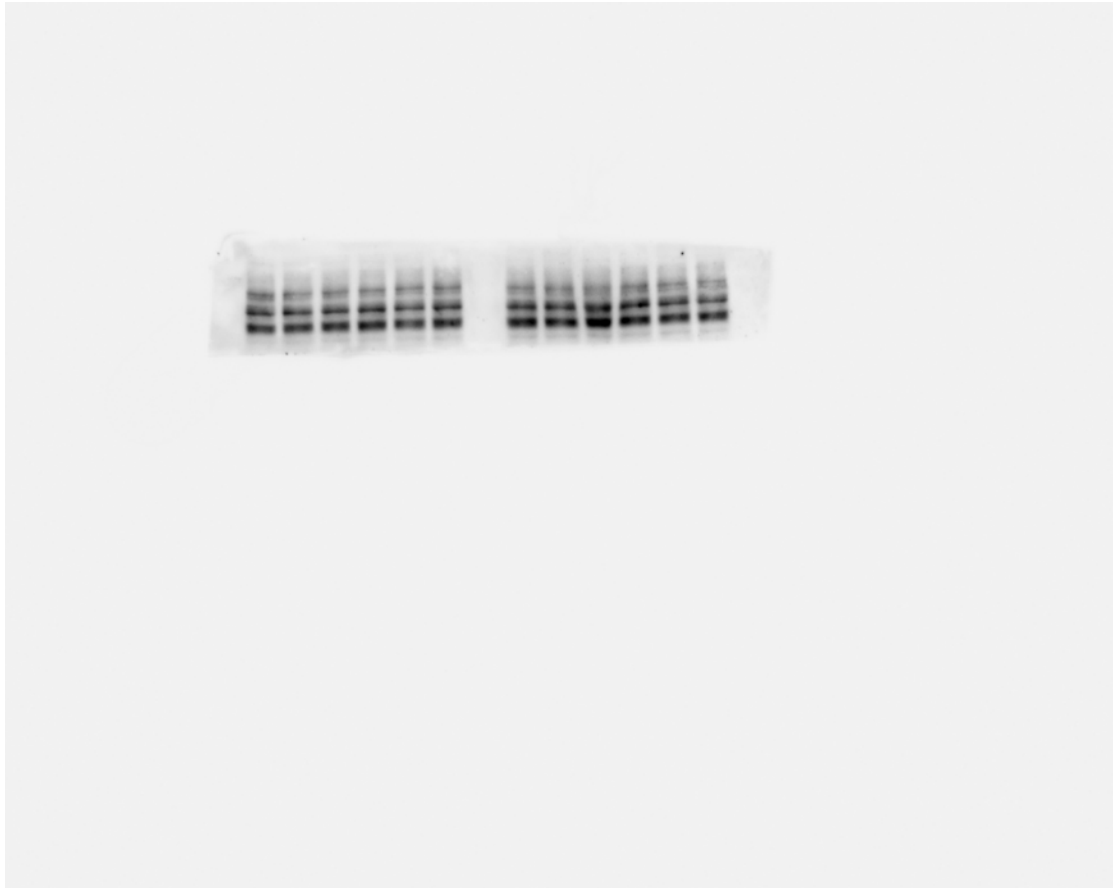

p-FGFR1

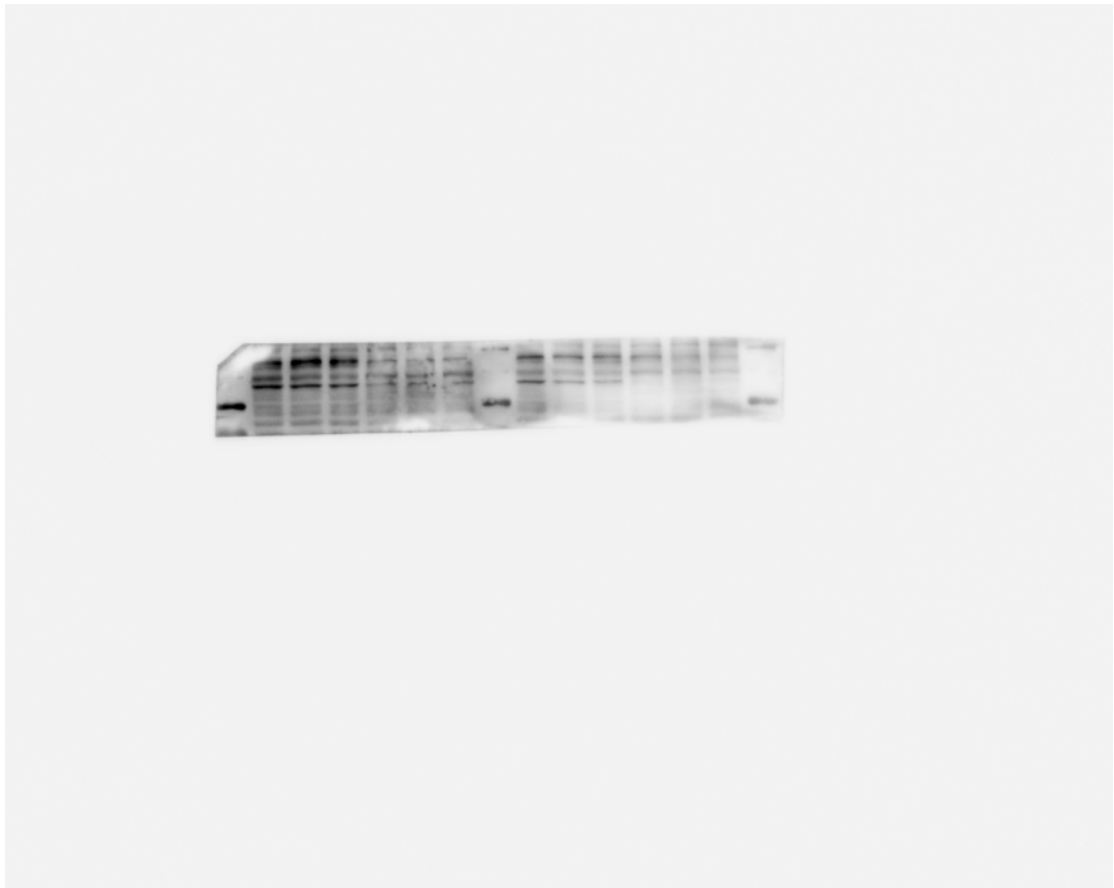

Fig. 4I  
FGFR1, LDHA

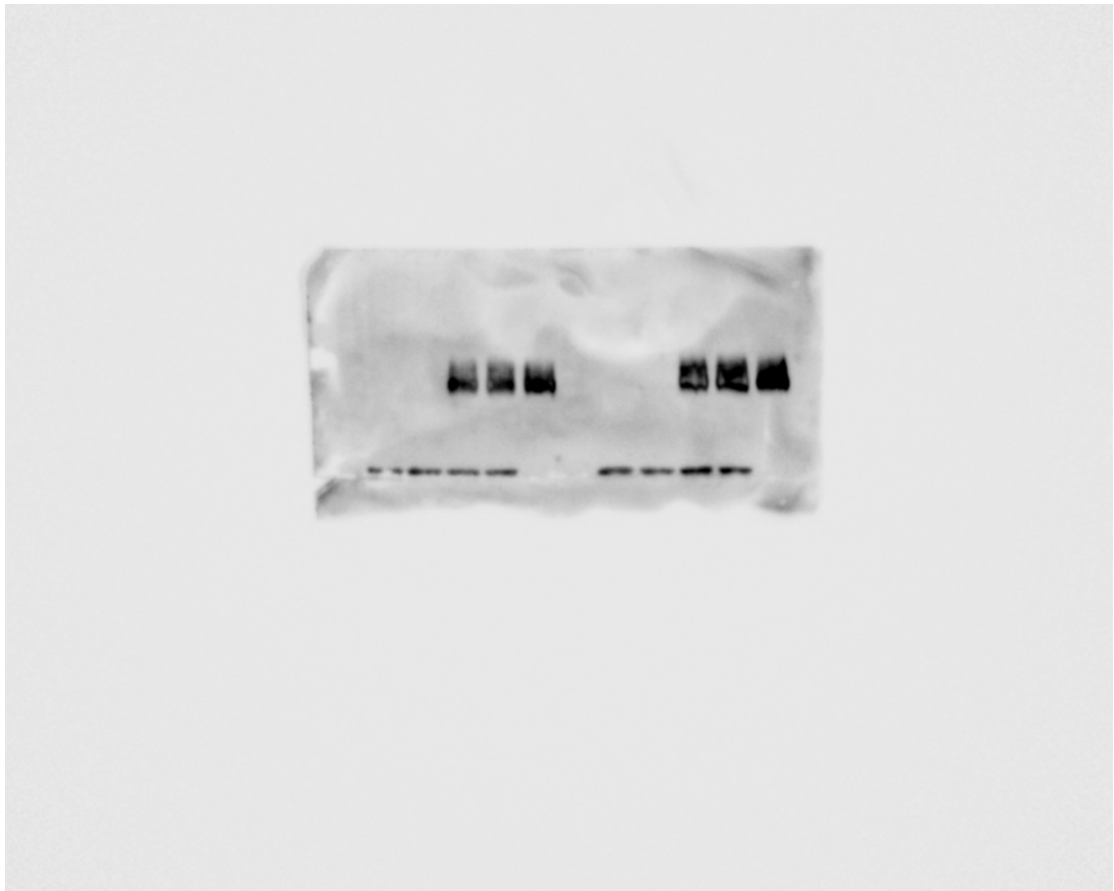

pLDHA



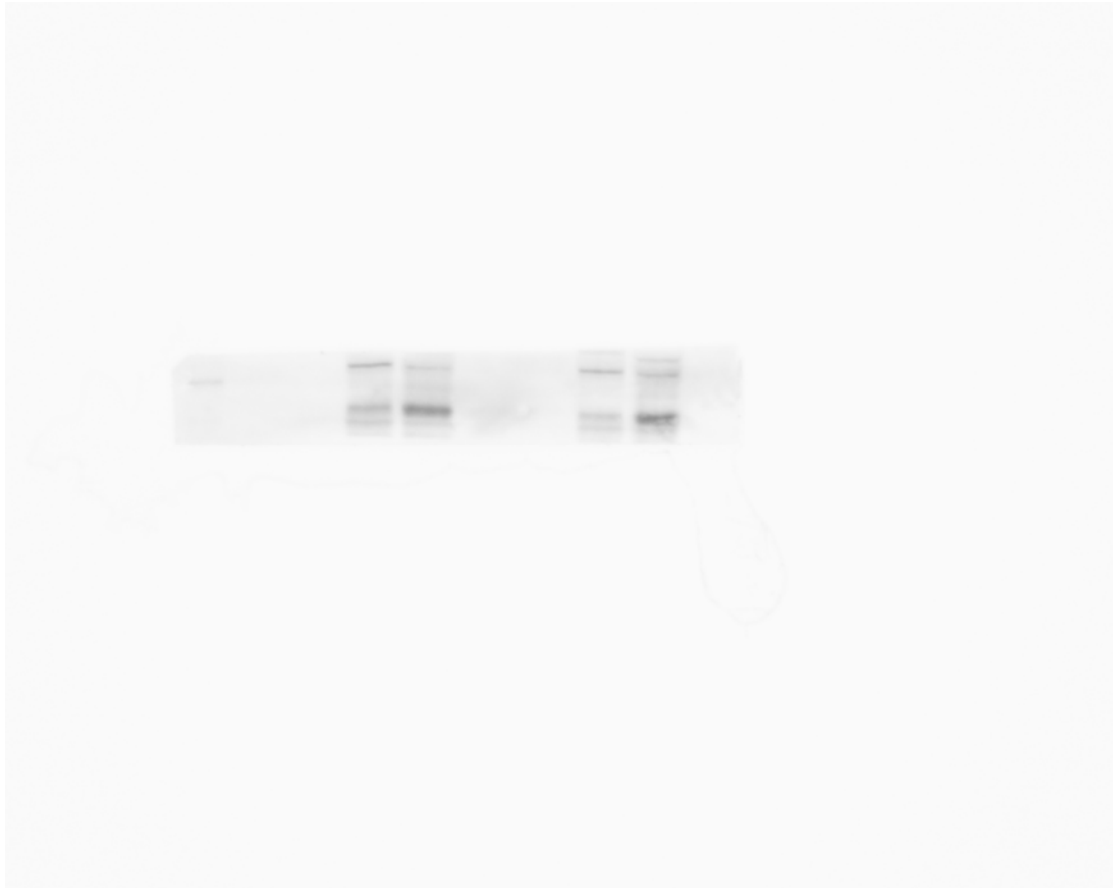

Flag

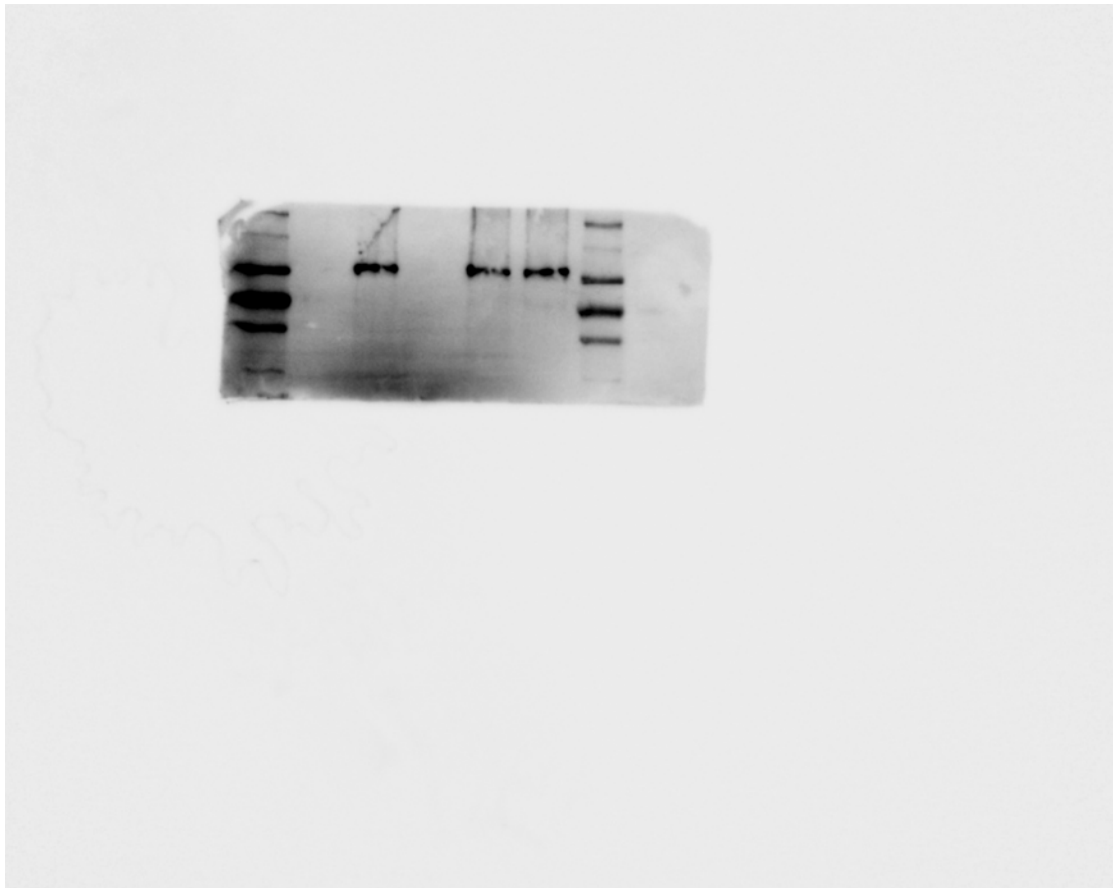

Fig. 5A  
Actin

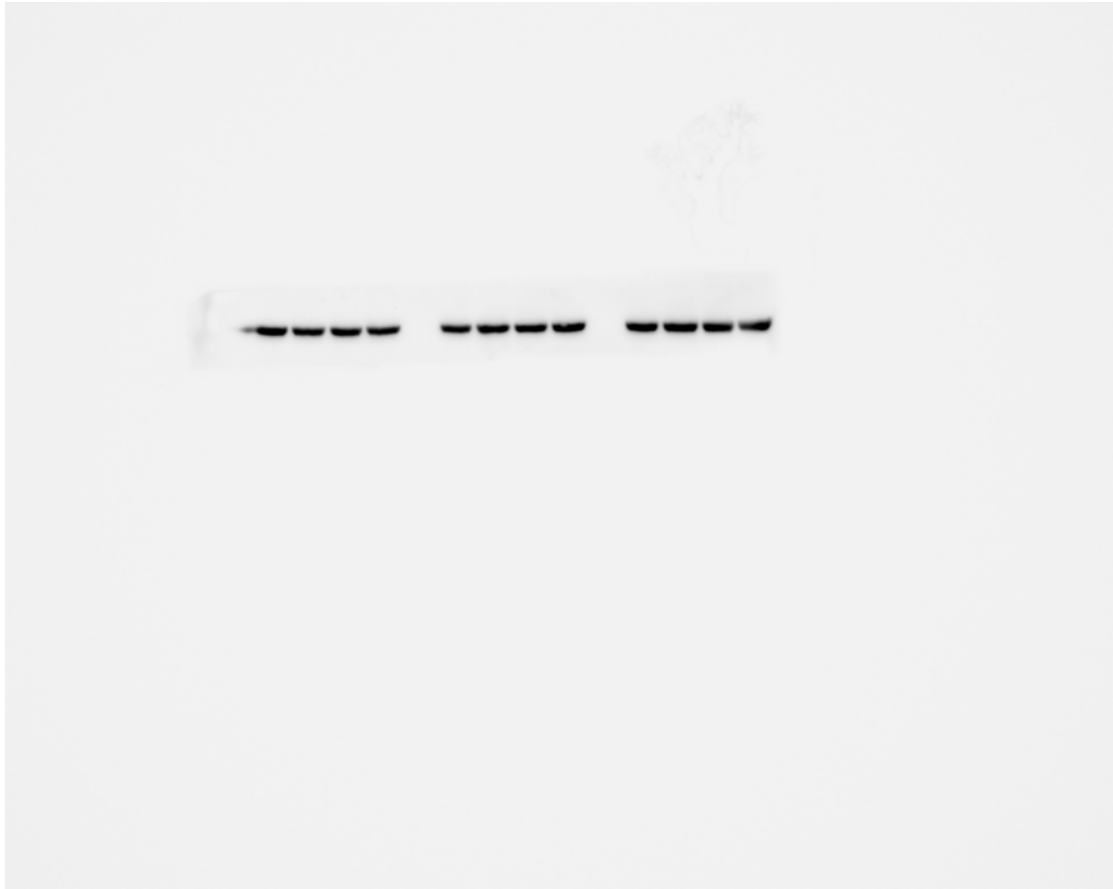

FKBP10

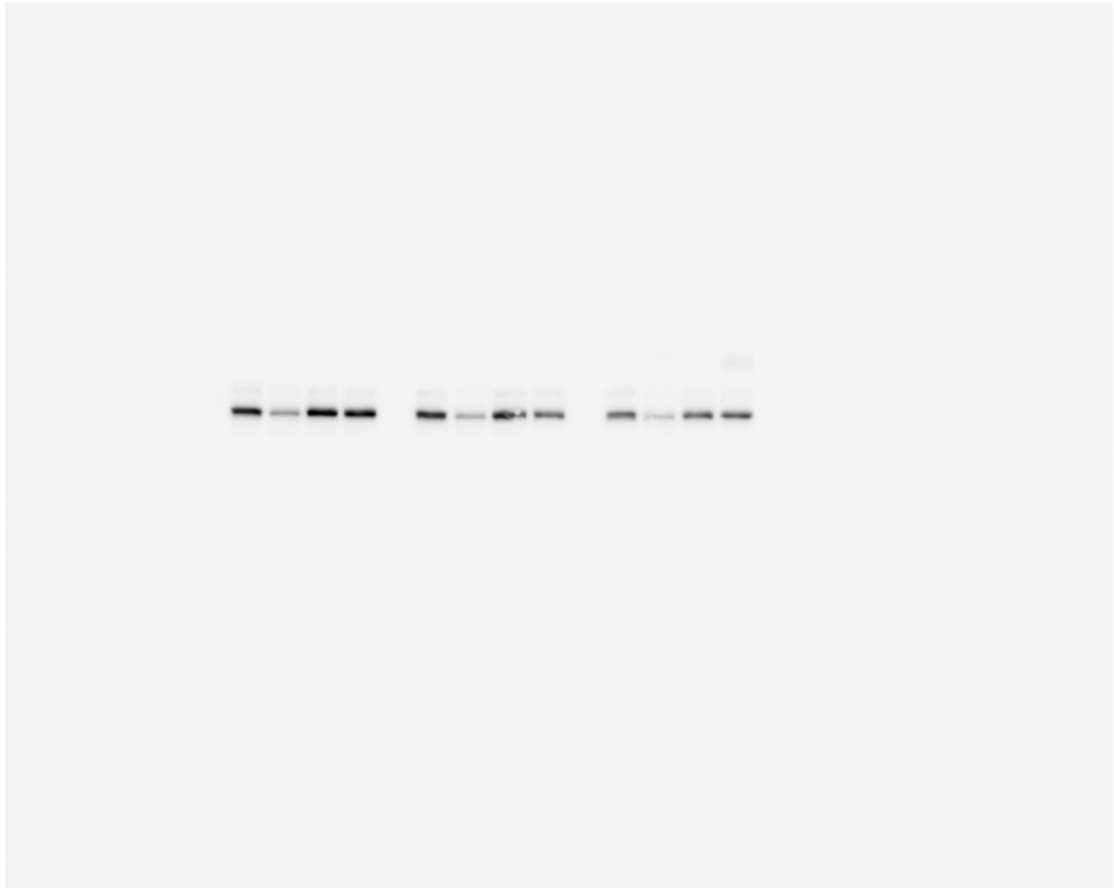

LDHA

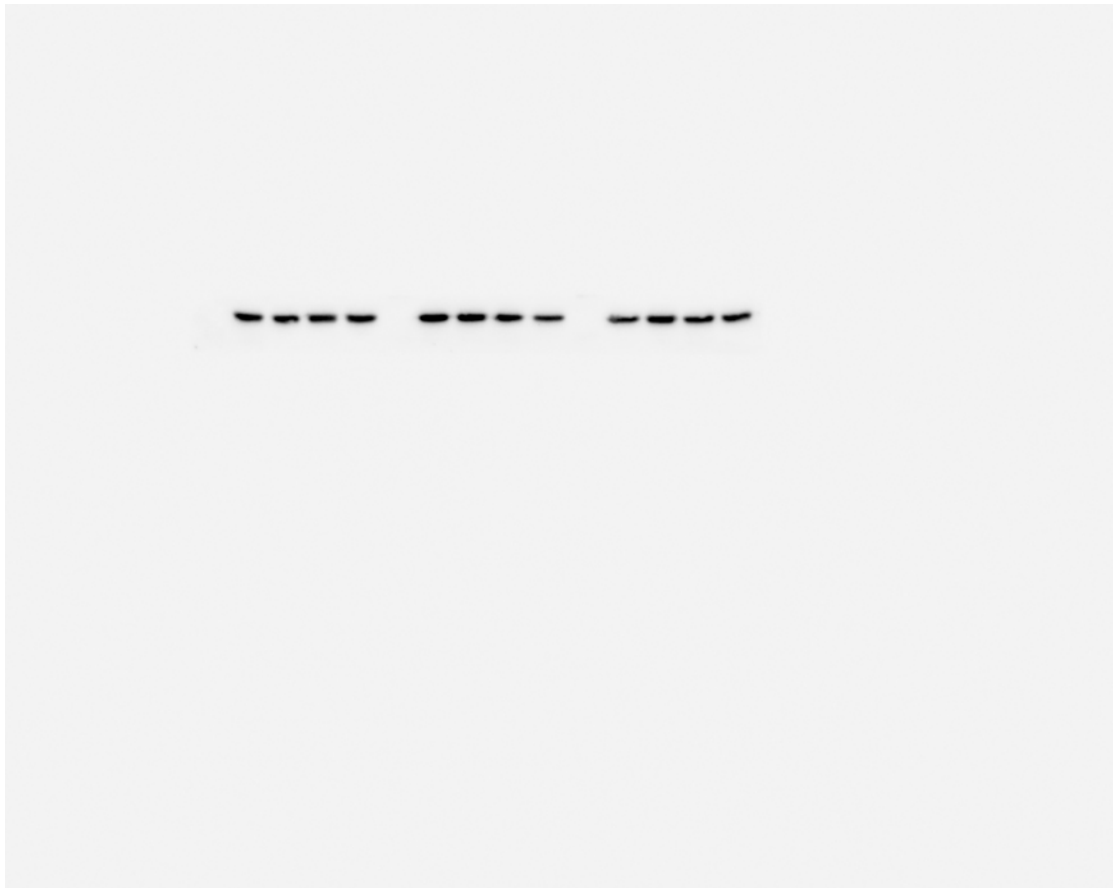

pLDHA

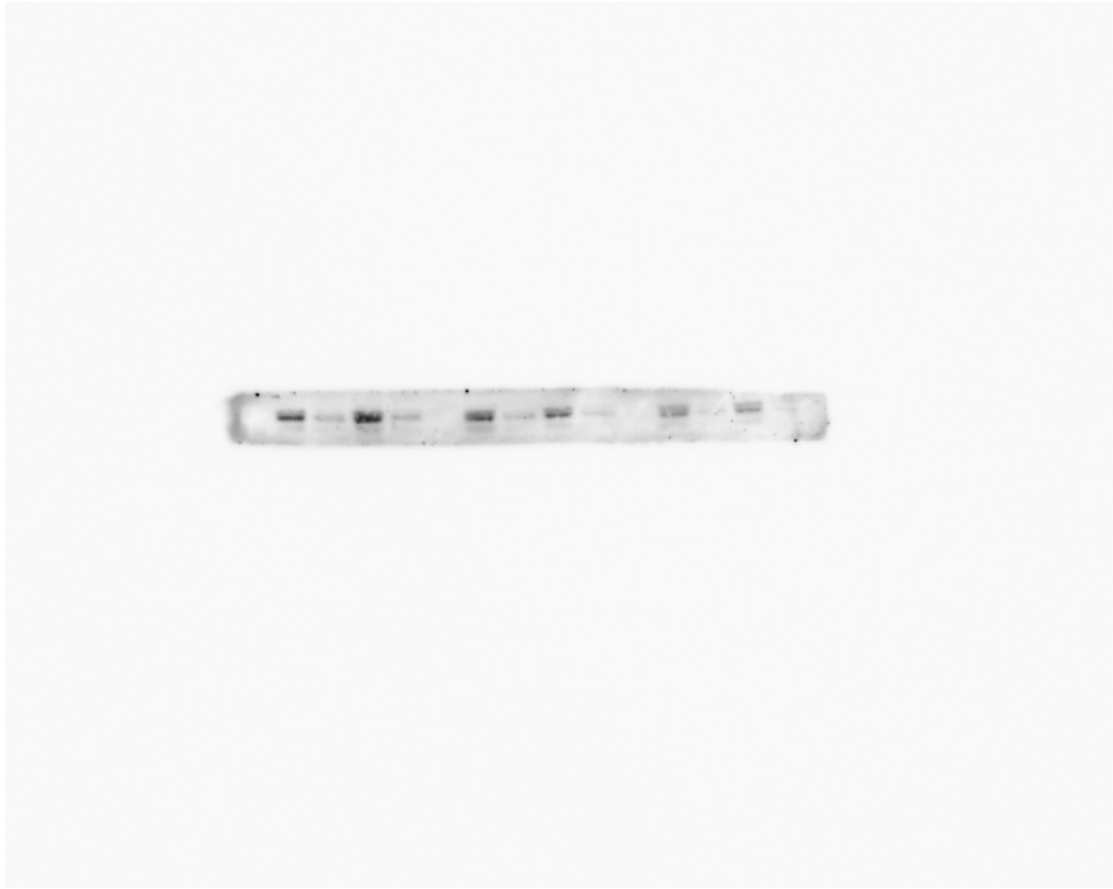

Flag

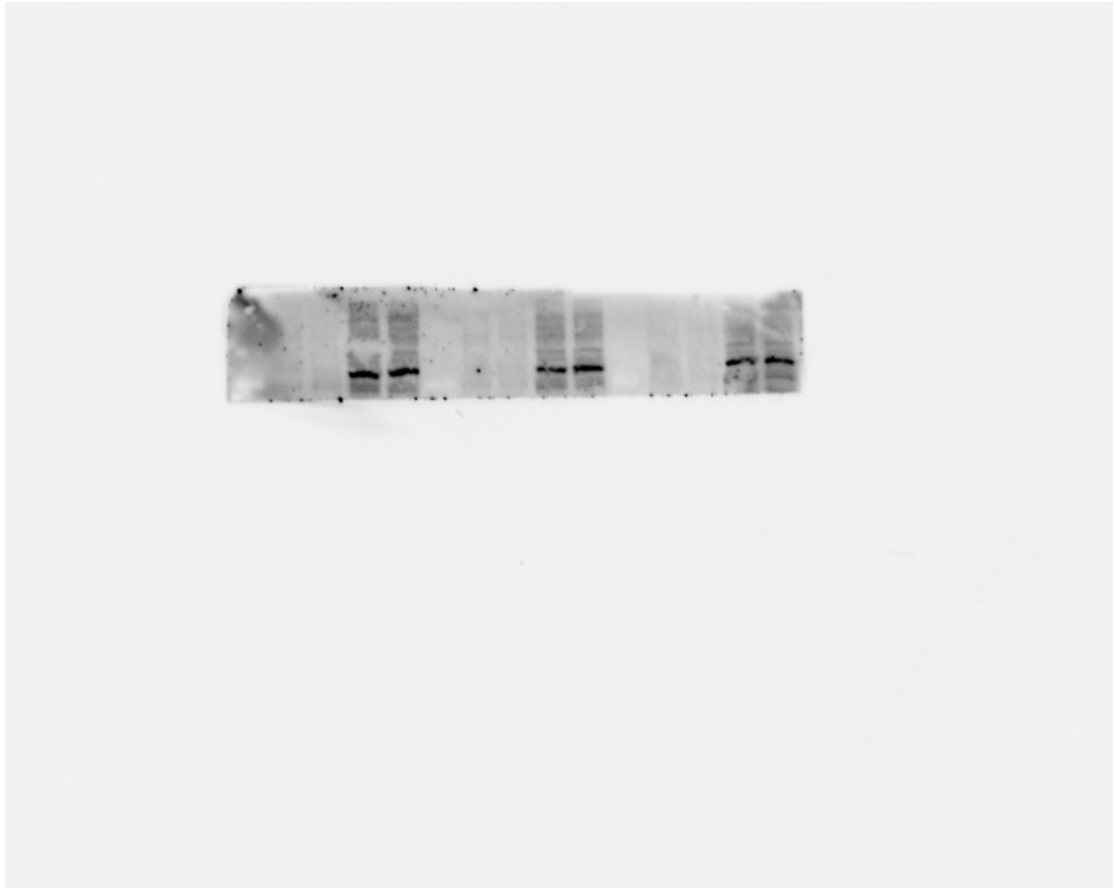

Fig. 5B  
Actin

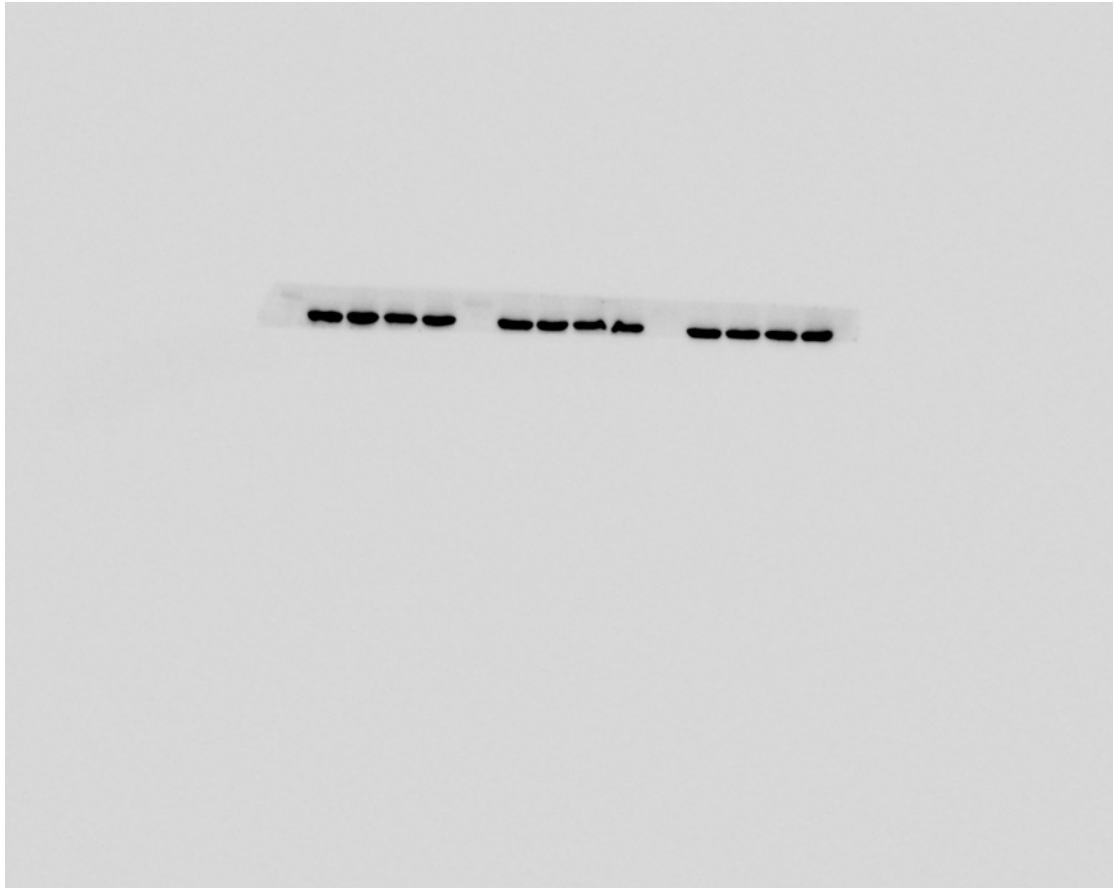

His

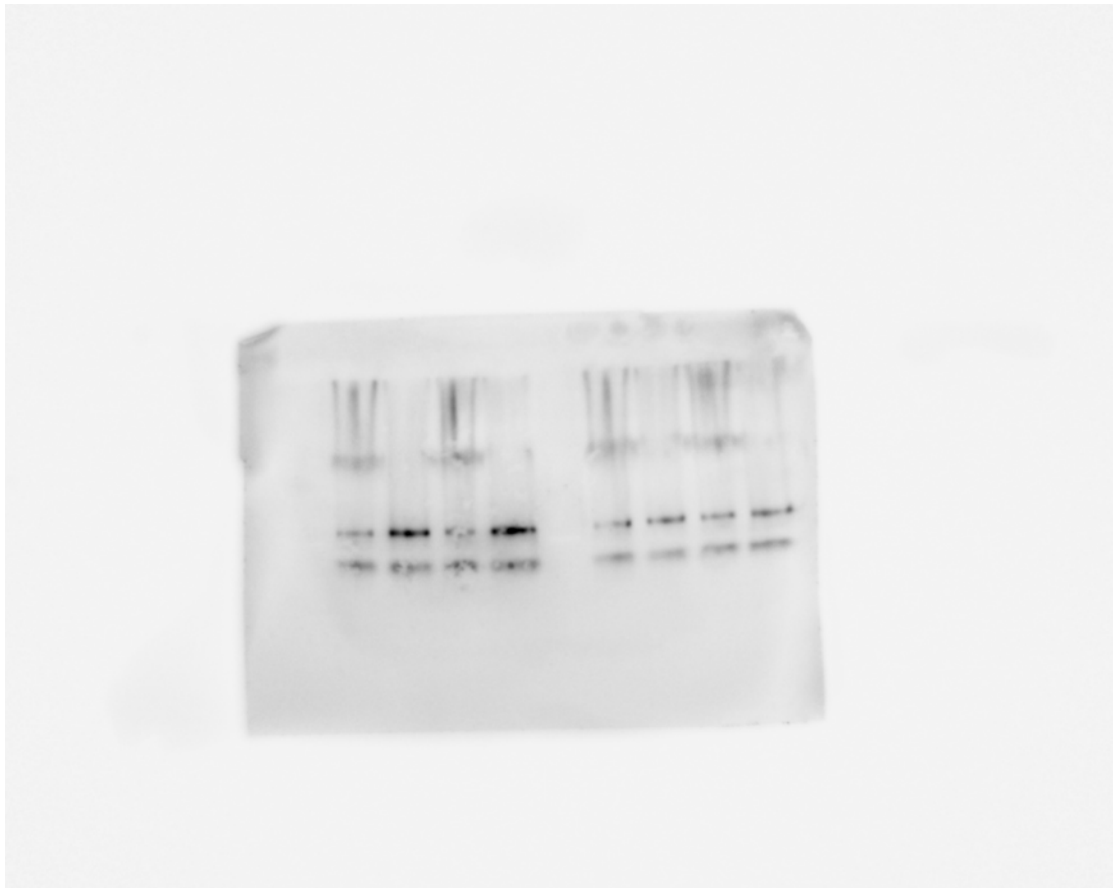

Fig. 6A  
Actin

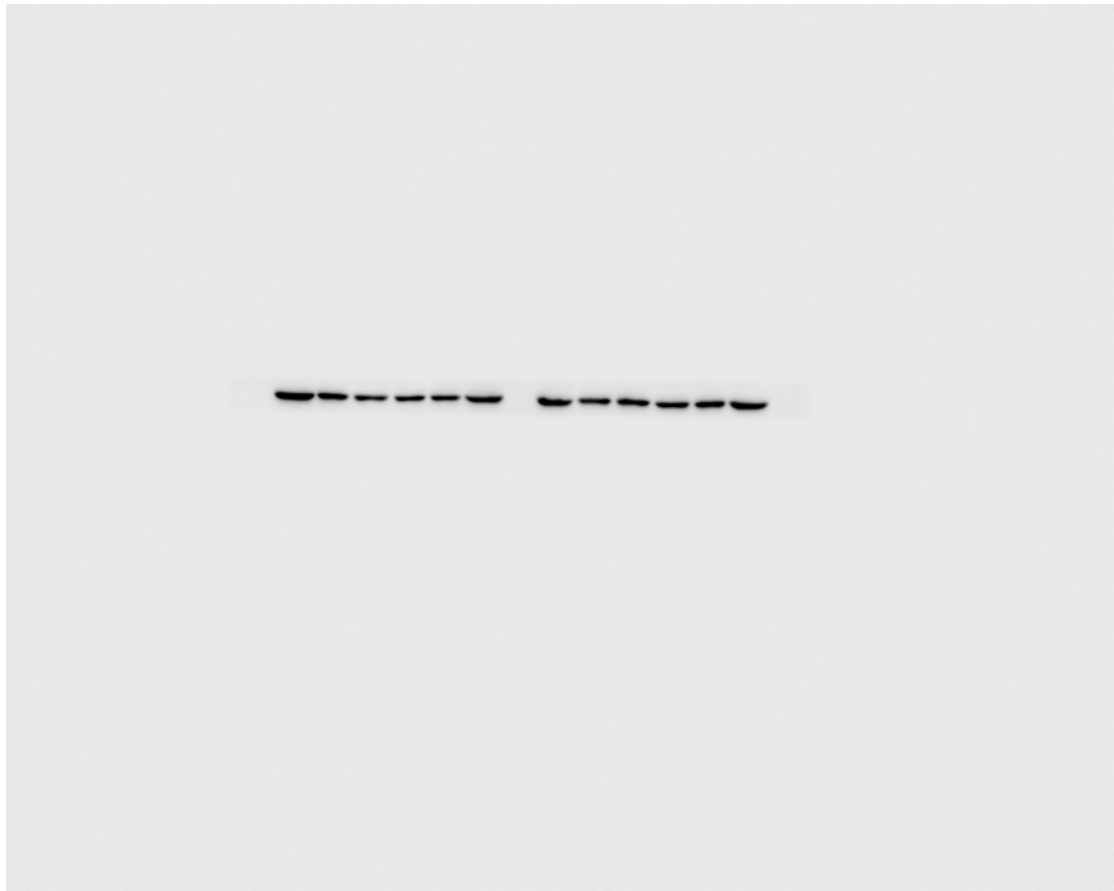

His

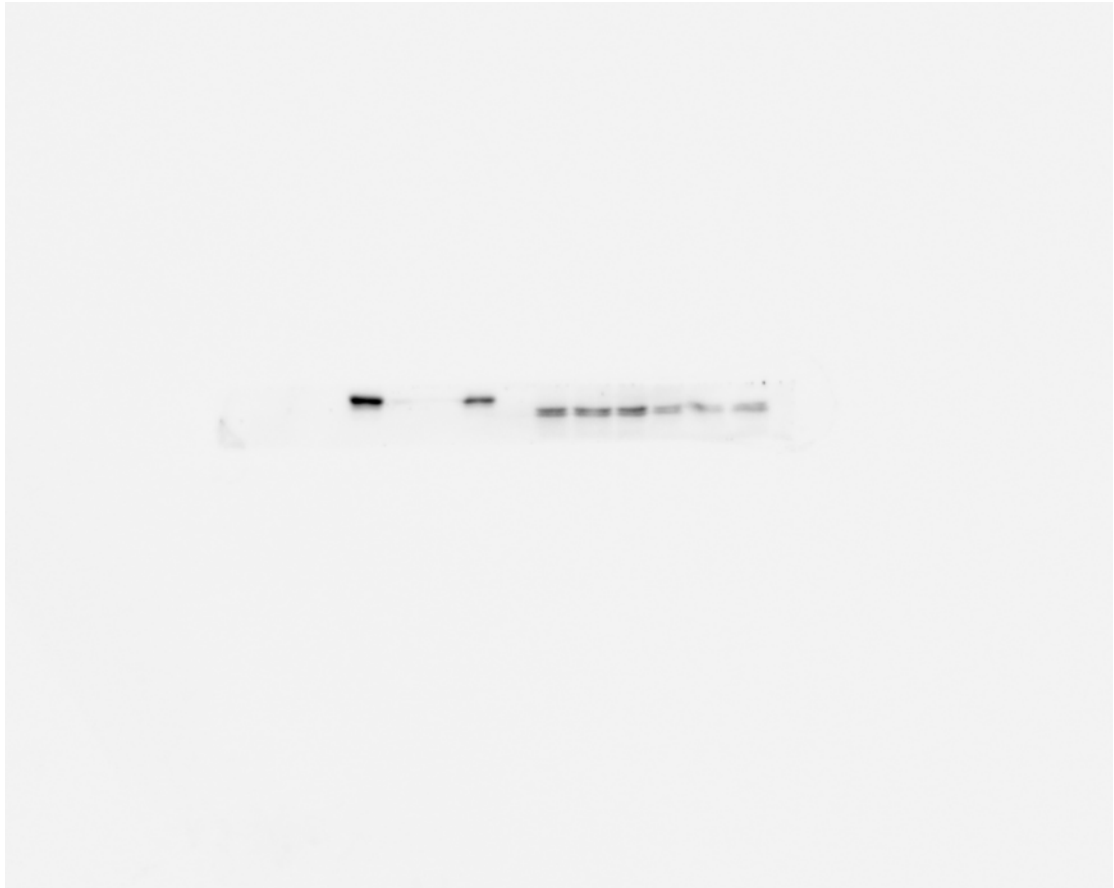

LDHA

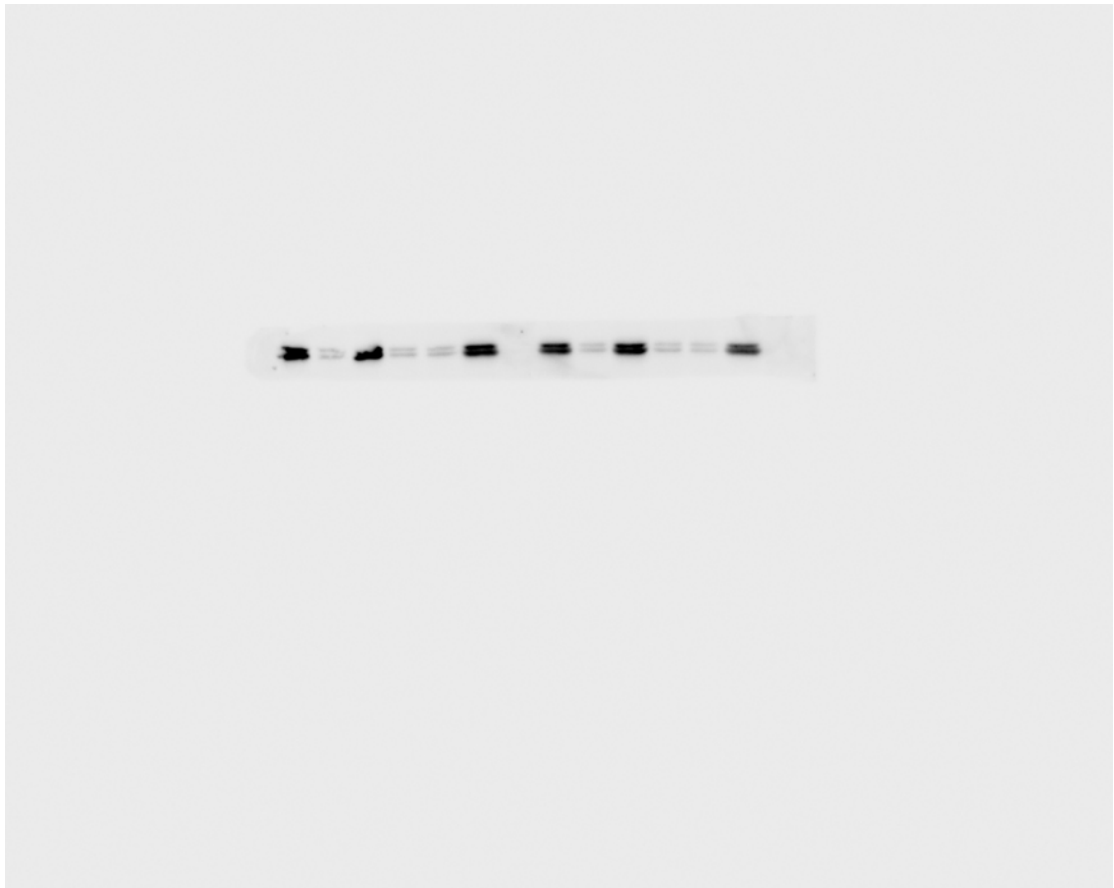



pLDHA

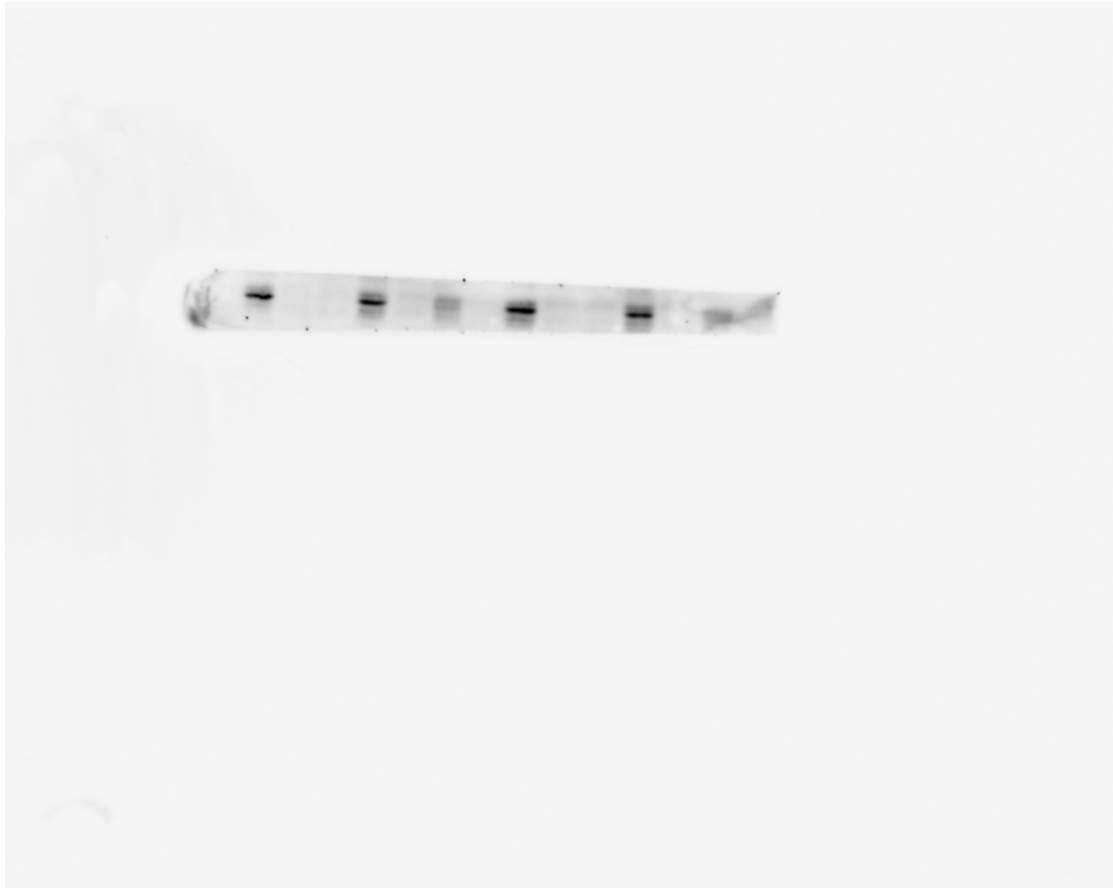

Flag

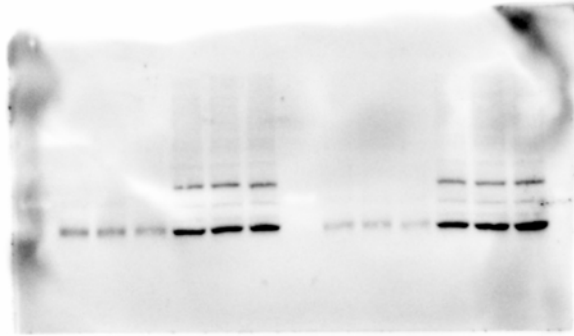

FKBP10

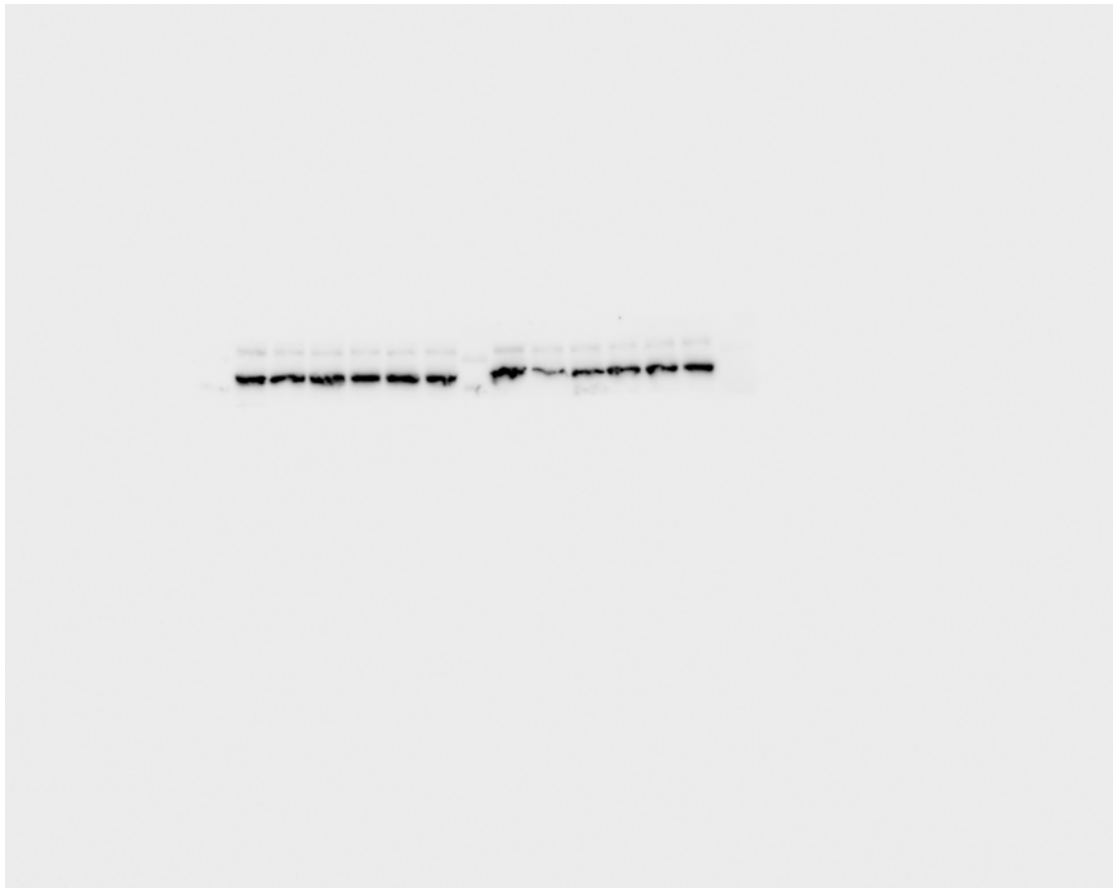

FGFR1

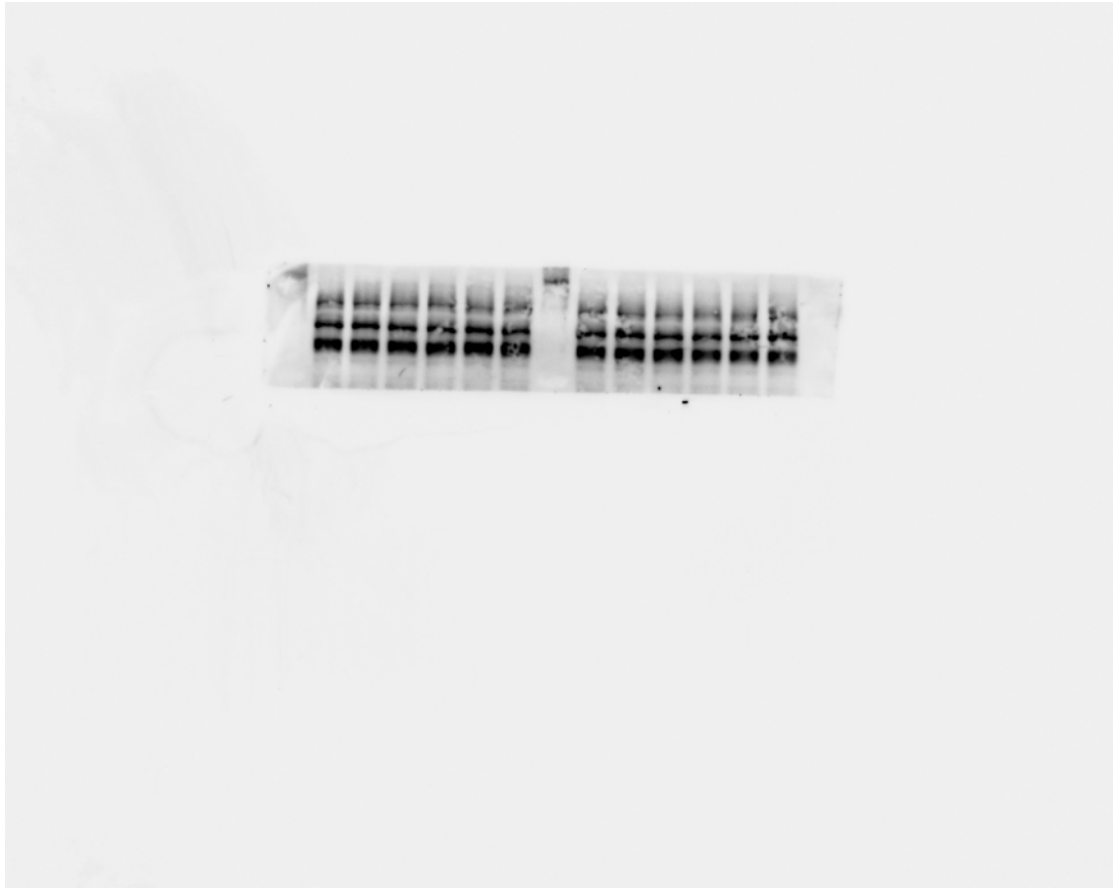

Fig. 6H  
Actin

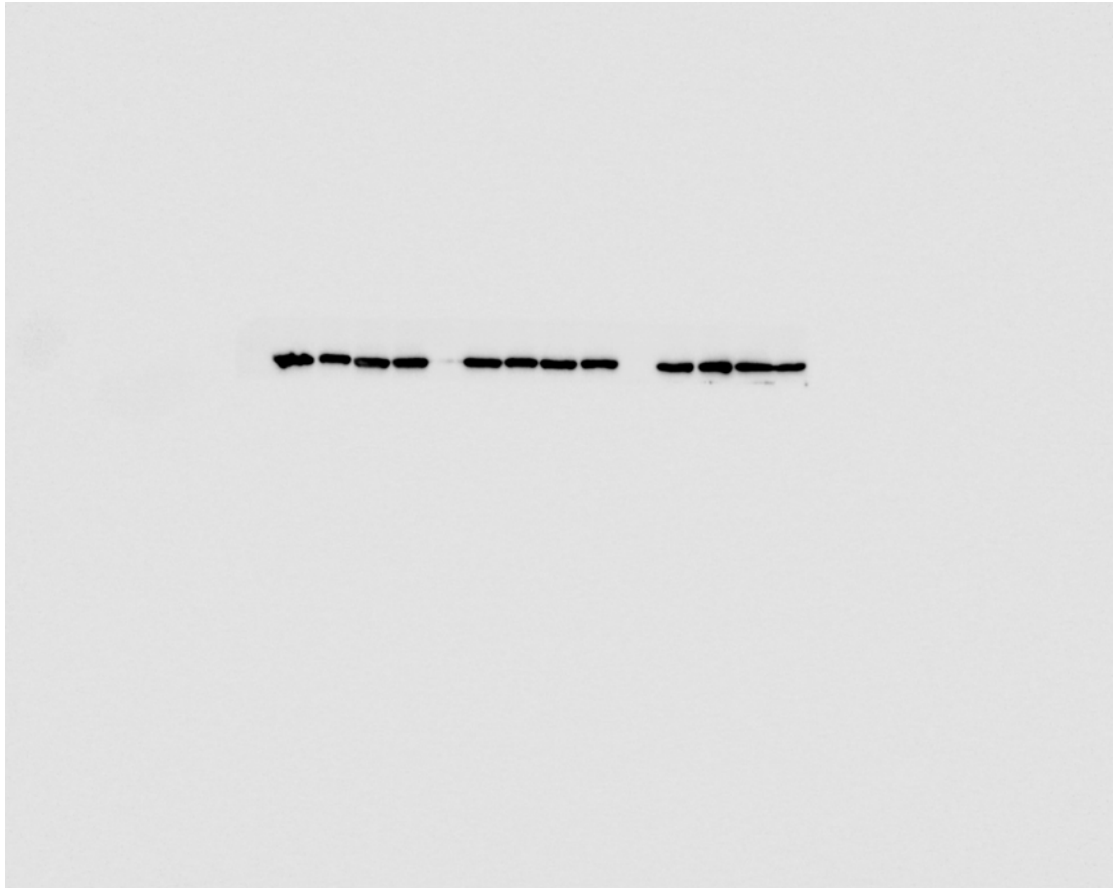

Pan Kla

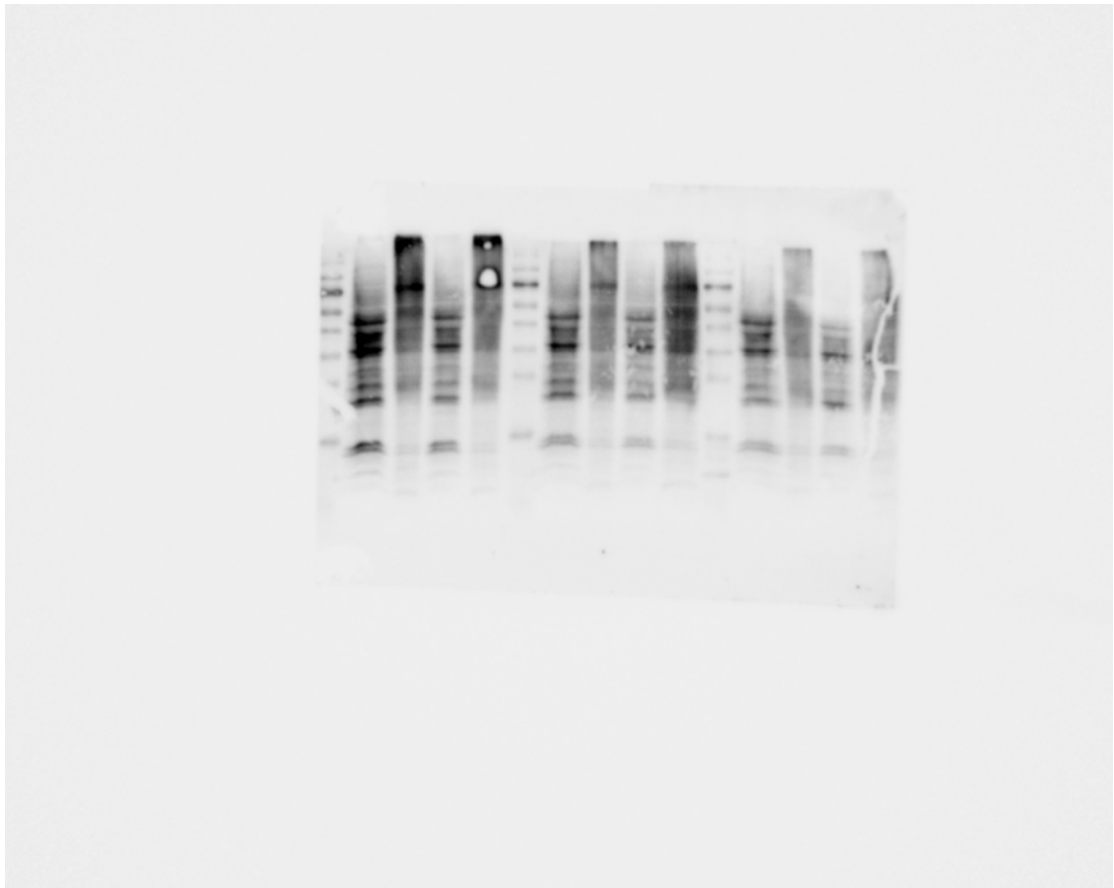

Fig. 6I

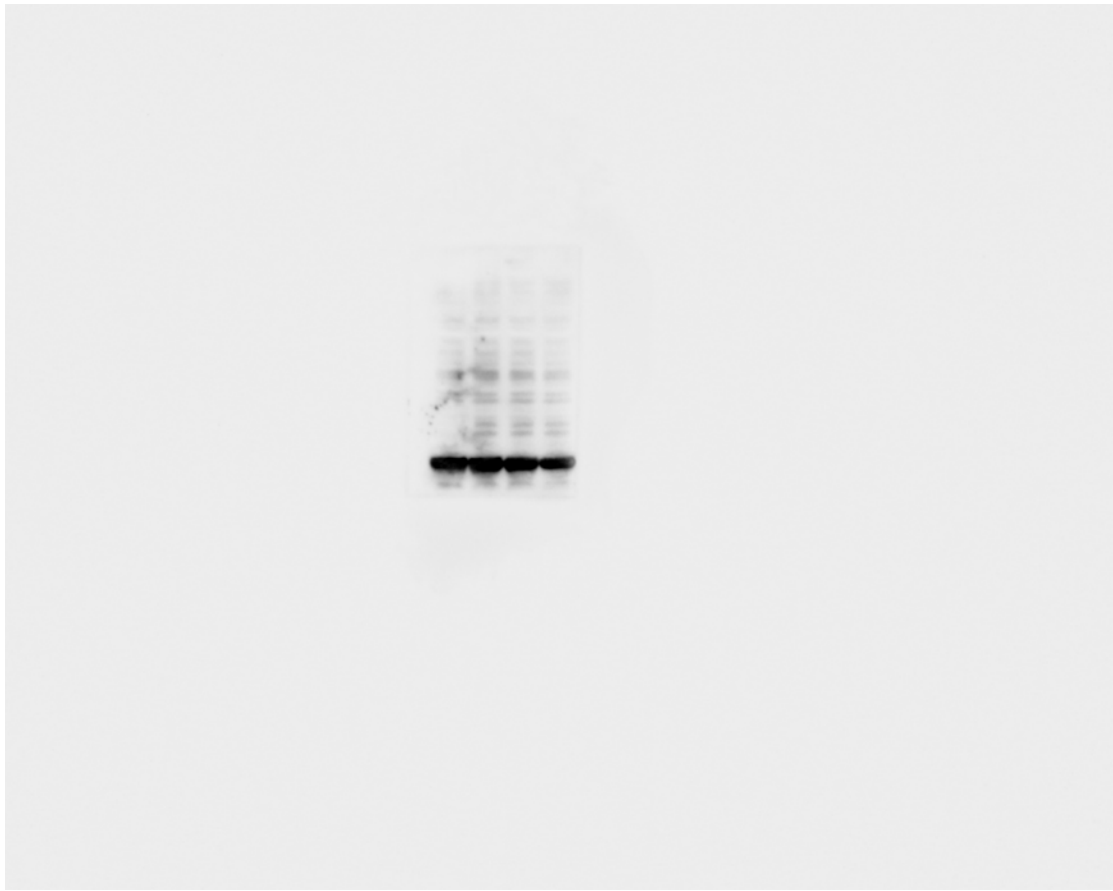

H3K56la

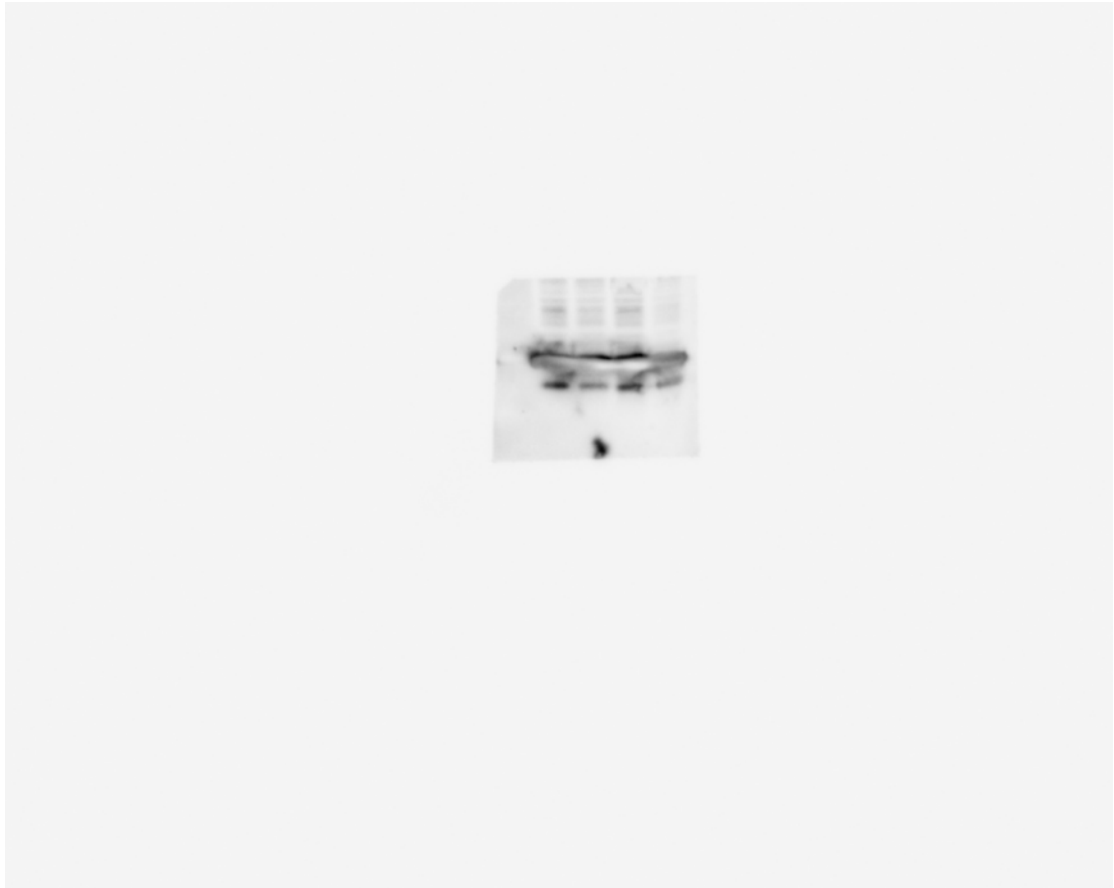

H3K18la

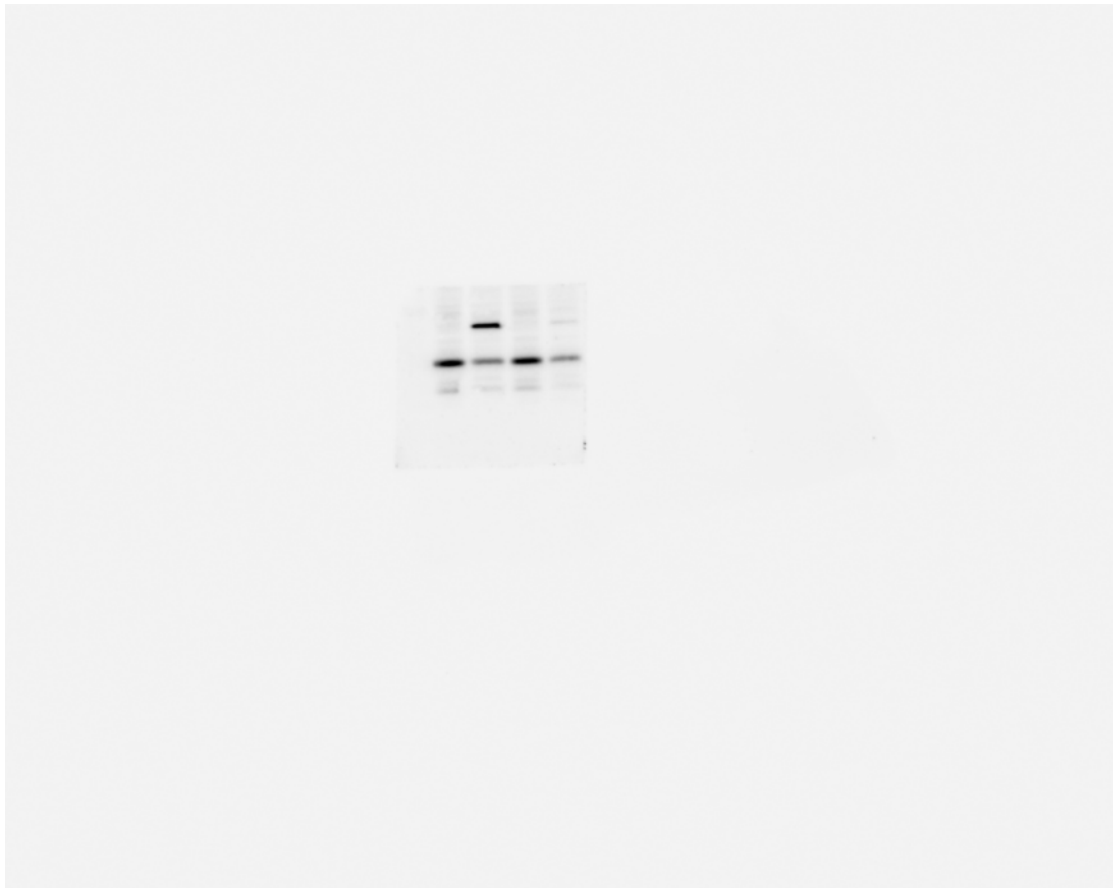

H3K14Ia

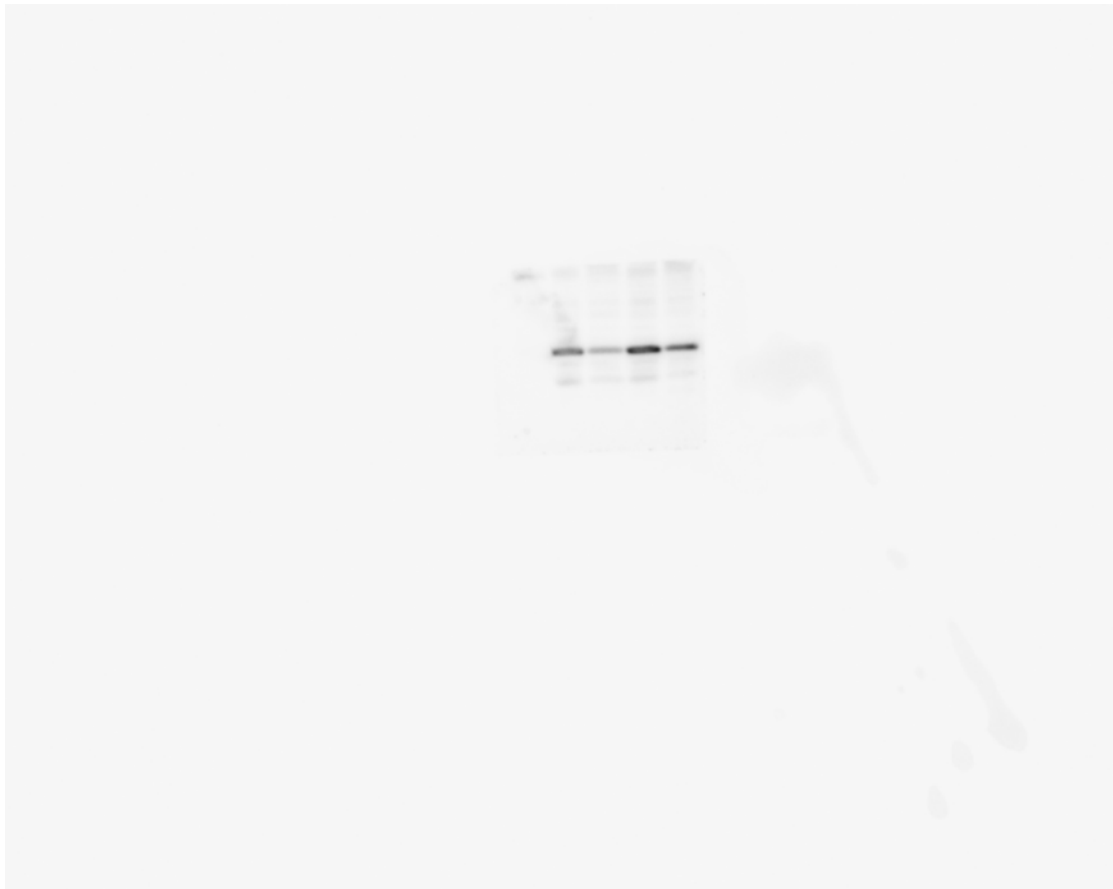

Pan kla

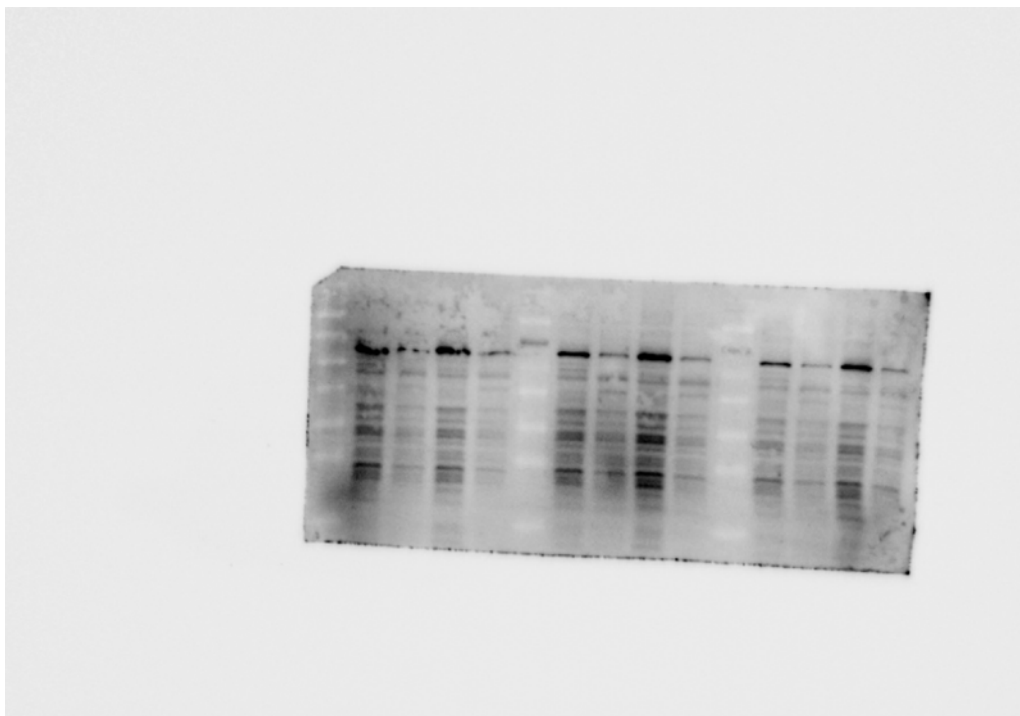

Fig. 7A

Actin

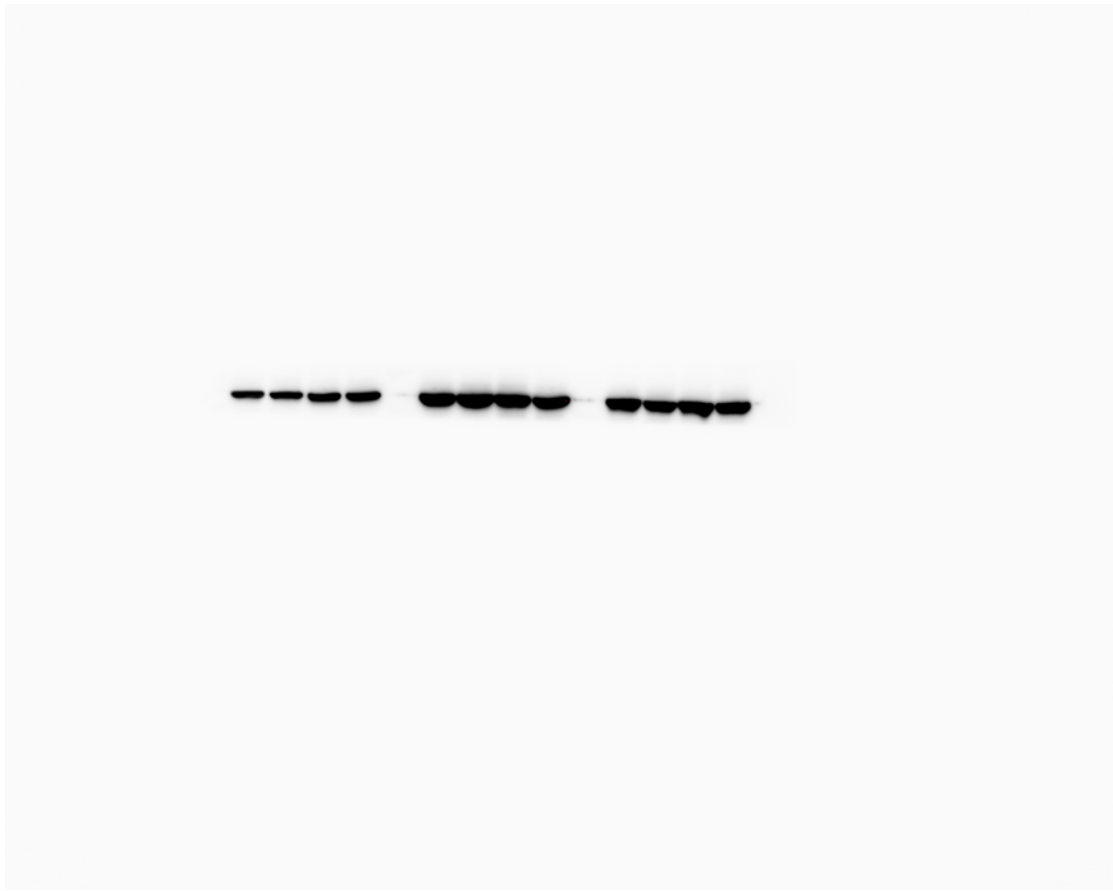

Actin-RCC4



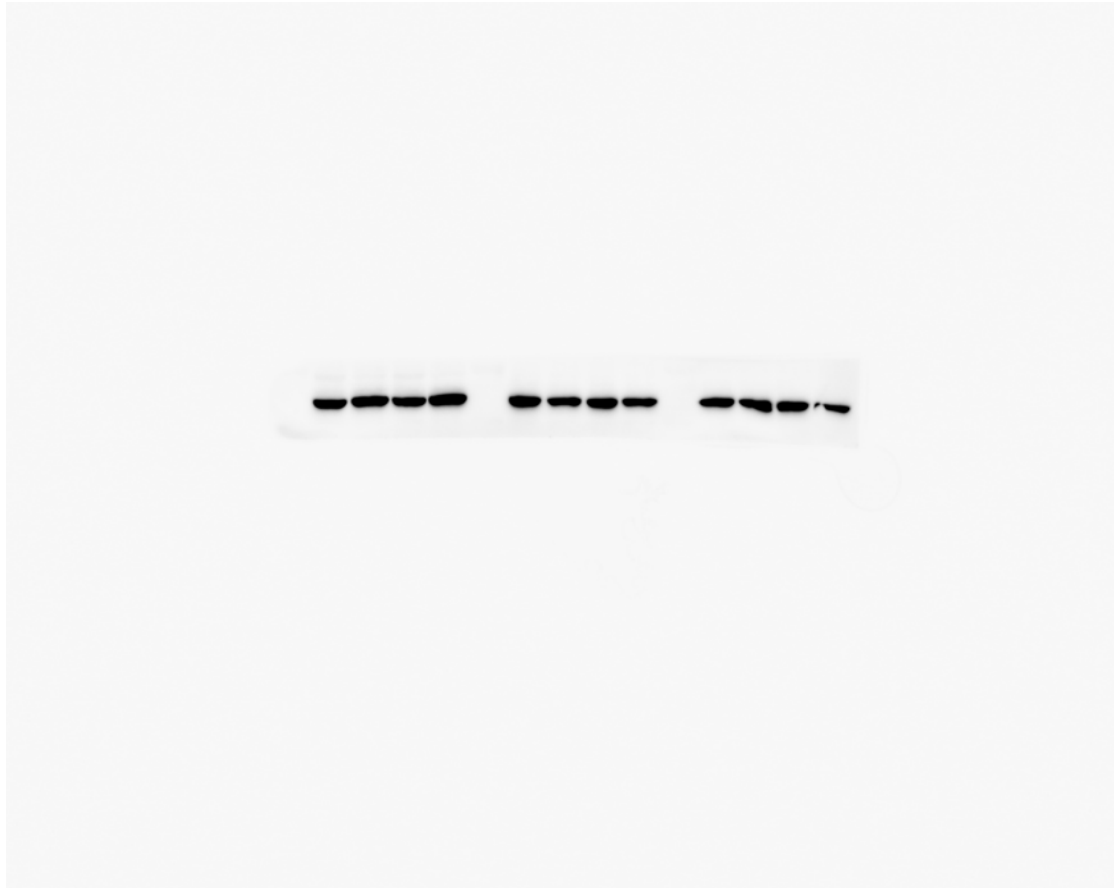

HIF1a-RCC4

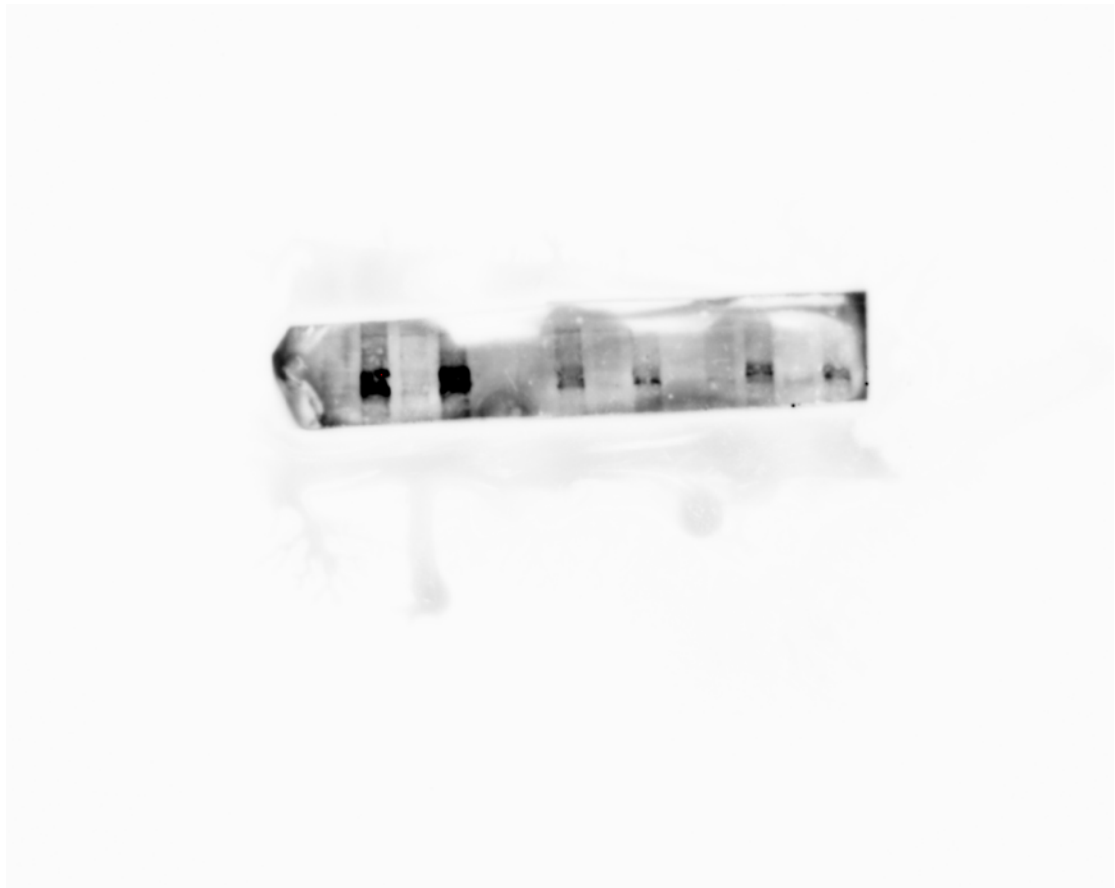

HIF1a-caki1

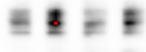

HIF1a-ACHN HK2

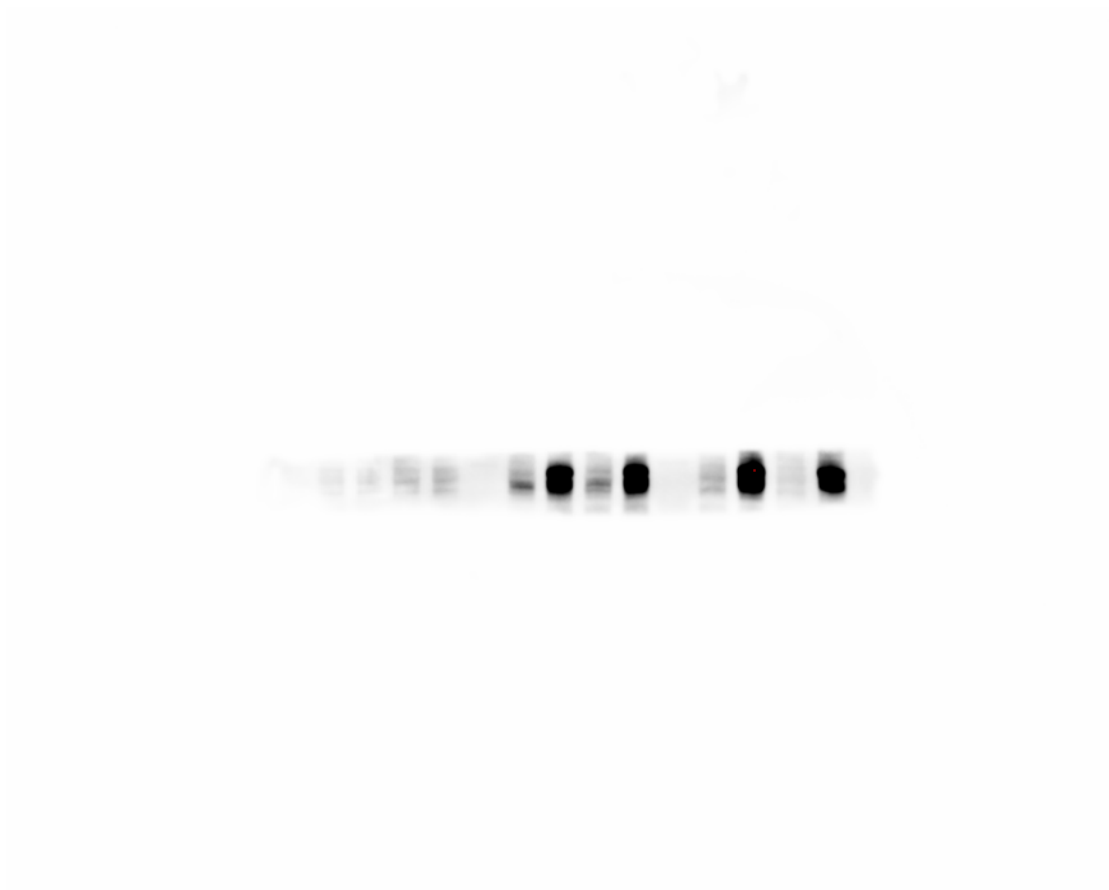

HIF2a-caki1 ACHN HK2

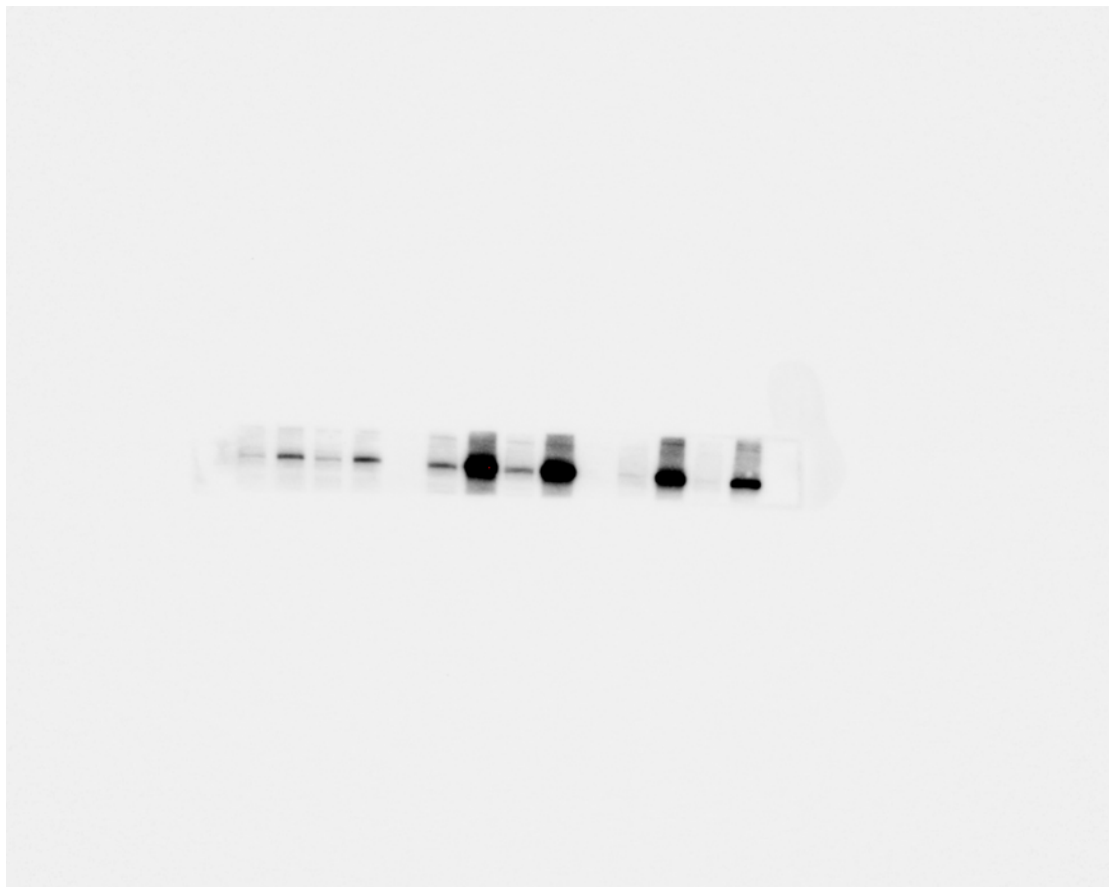

HIF2a-RCC4

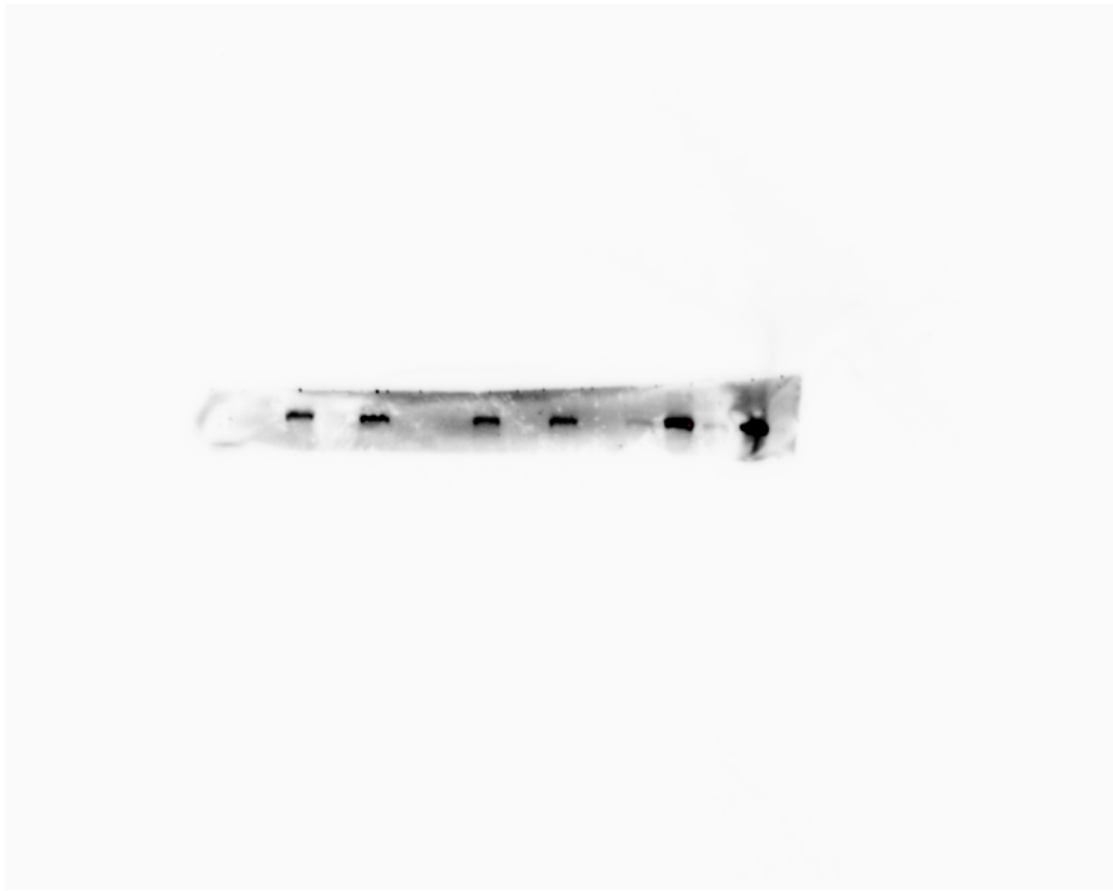

FKBP10-RCC4

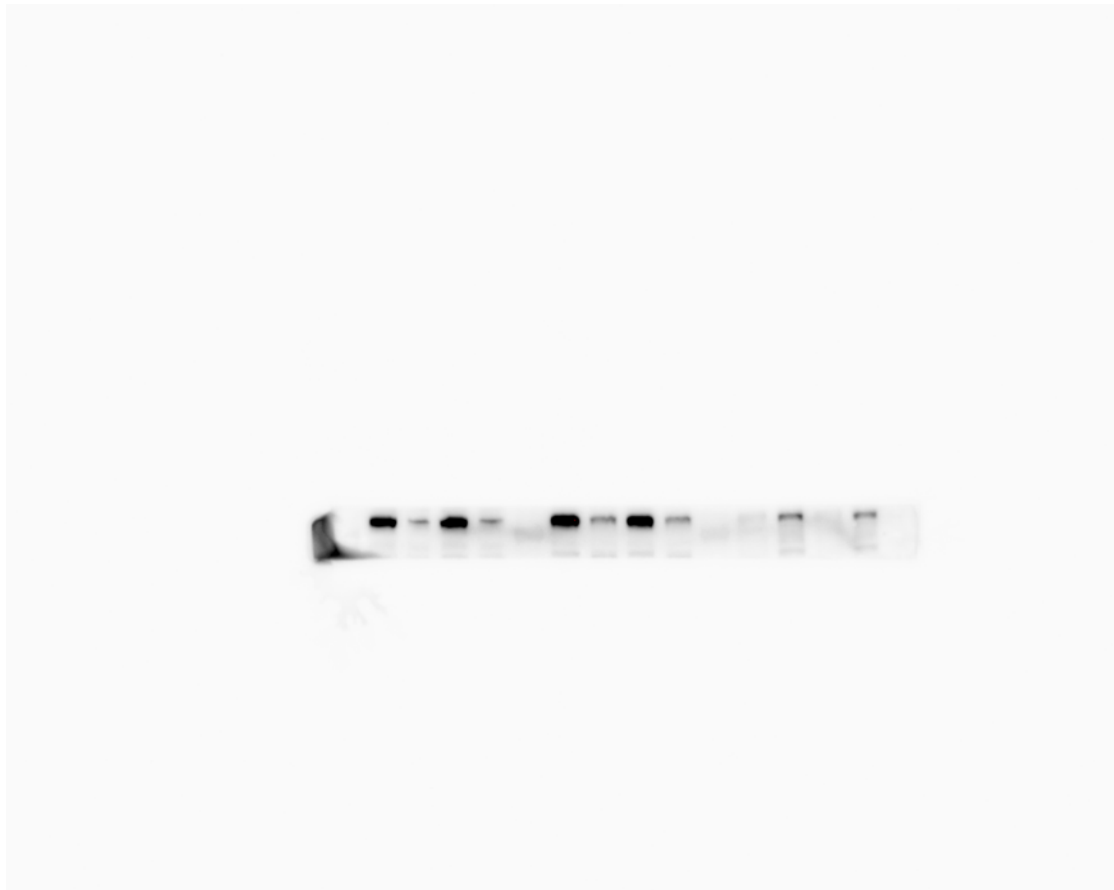

FKBP10-ACHN

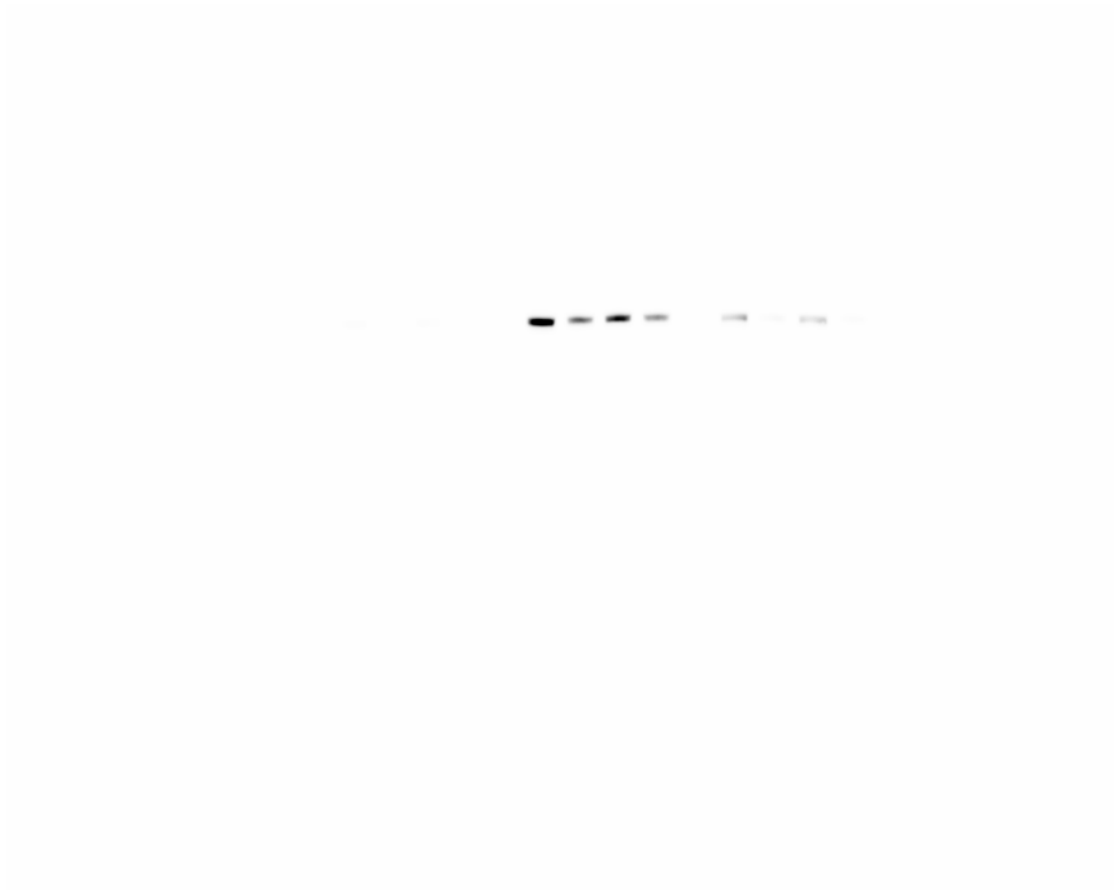

FKBP10-Caki1

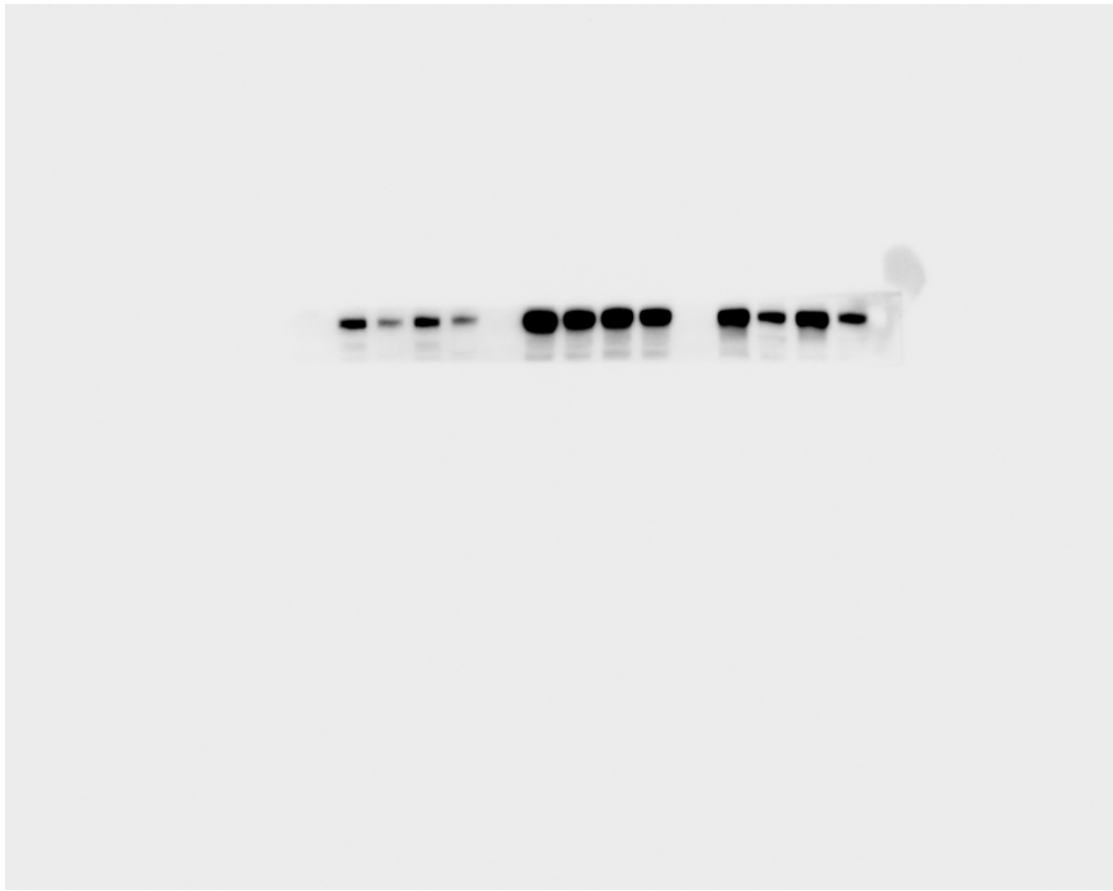

FKBP10-HK2

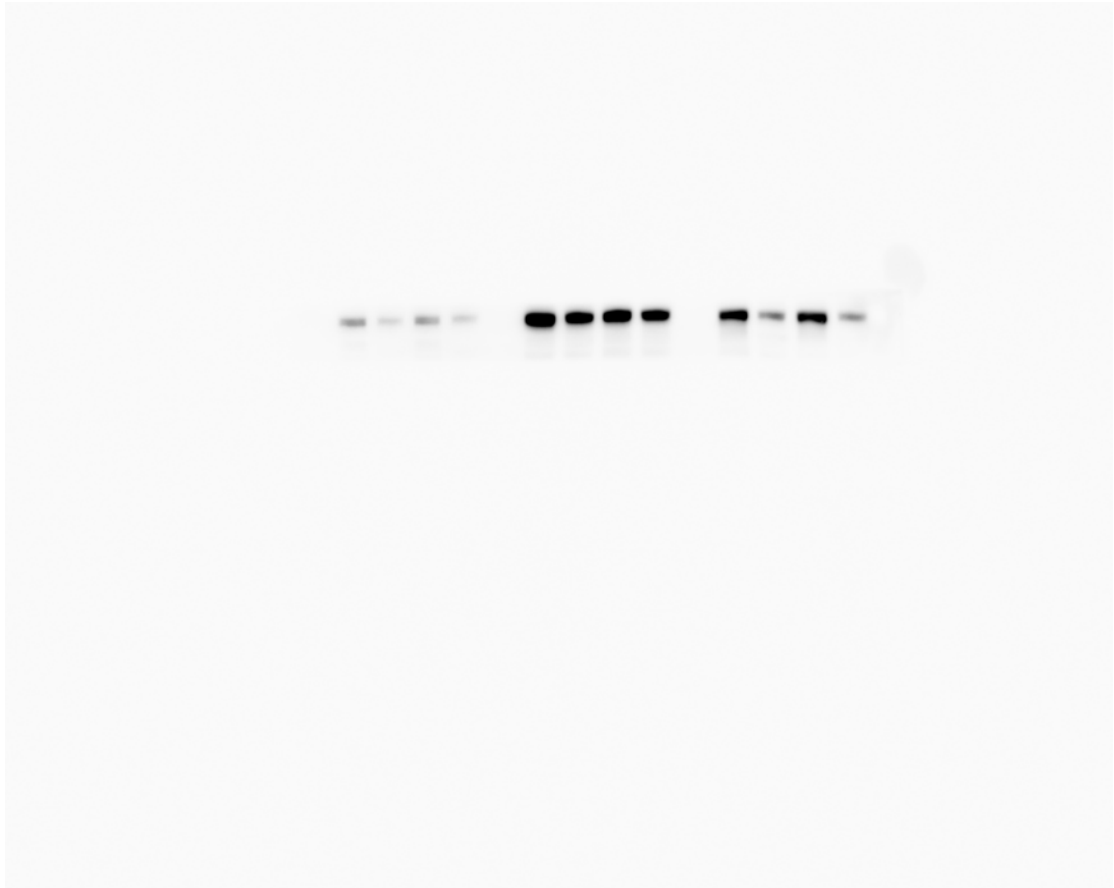

Fig. 7B  
Actin

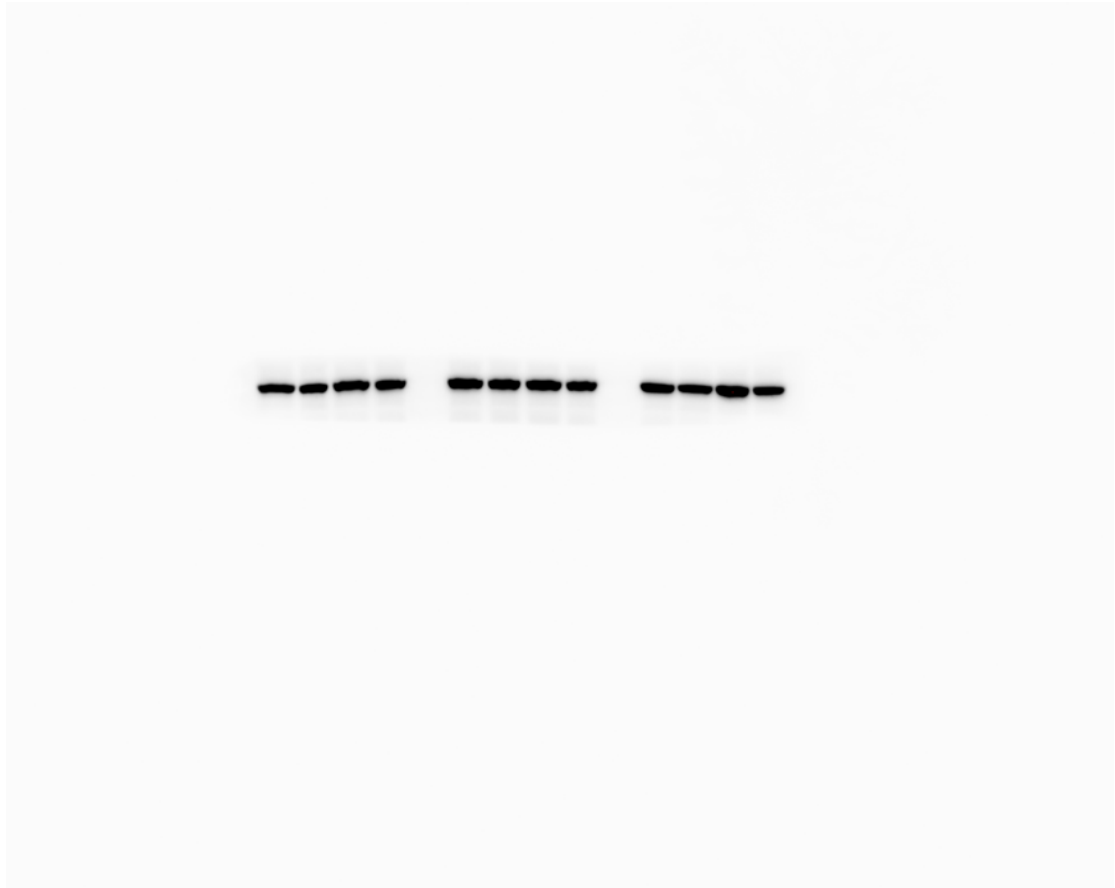

FKBP10

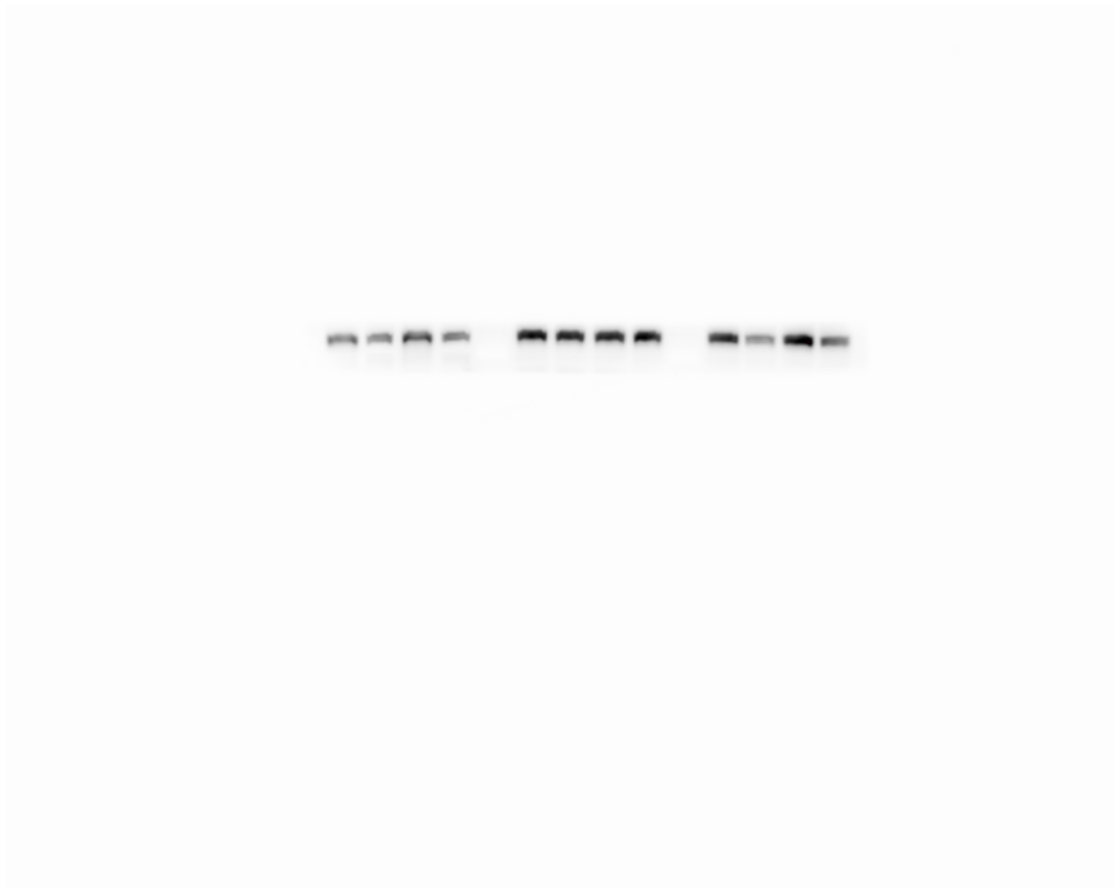



HIF1a

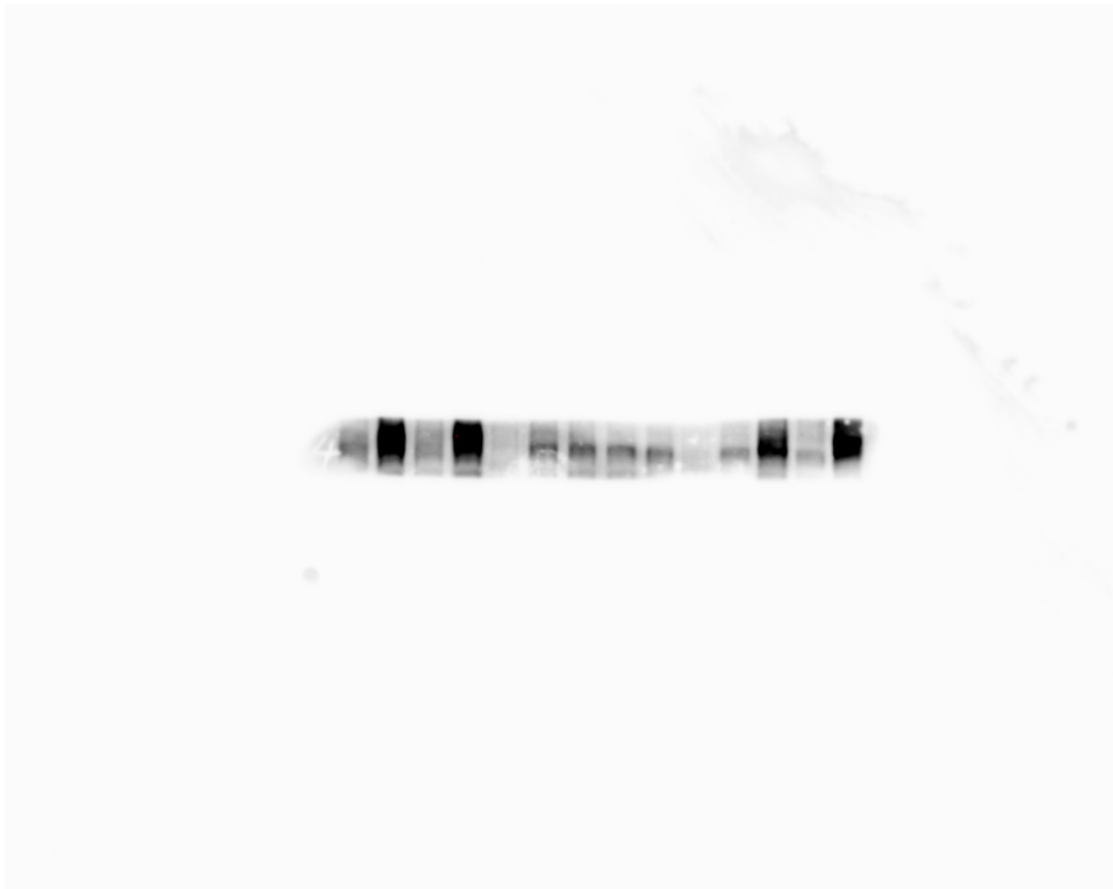

HIF2a

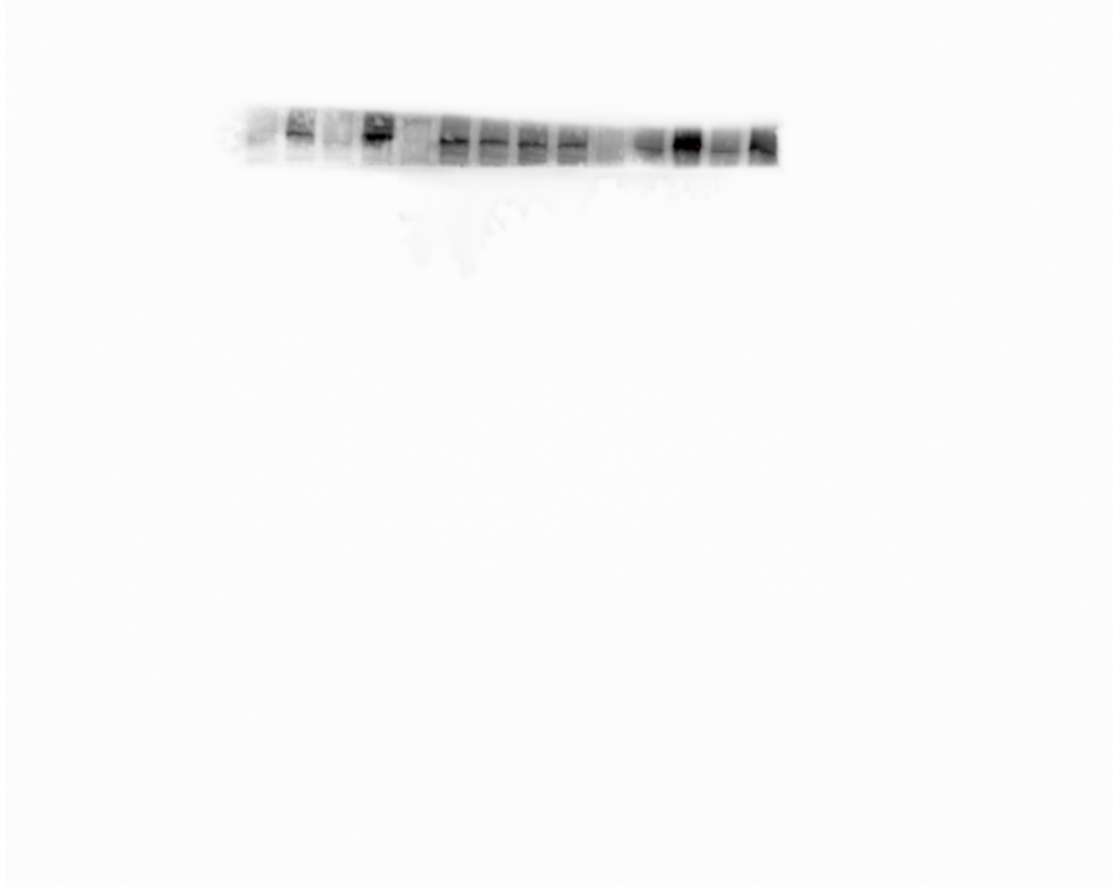

Fig. 7C  
Actin

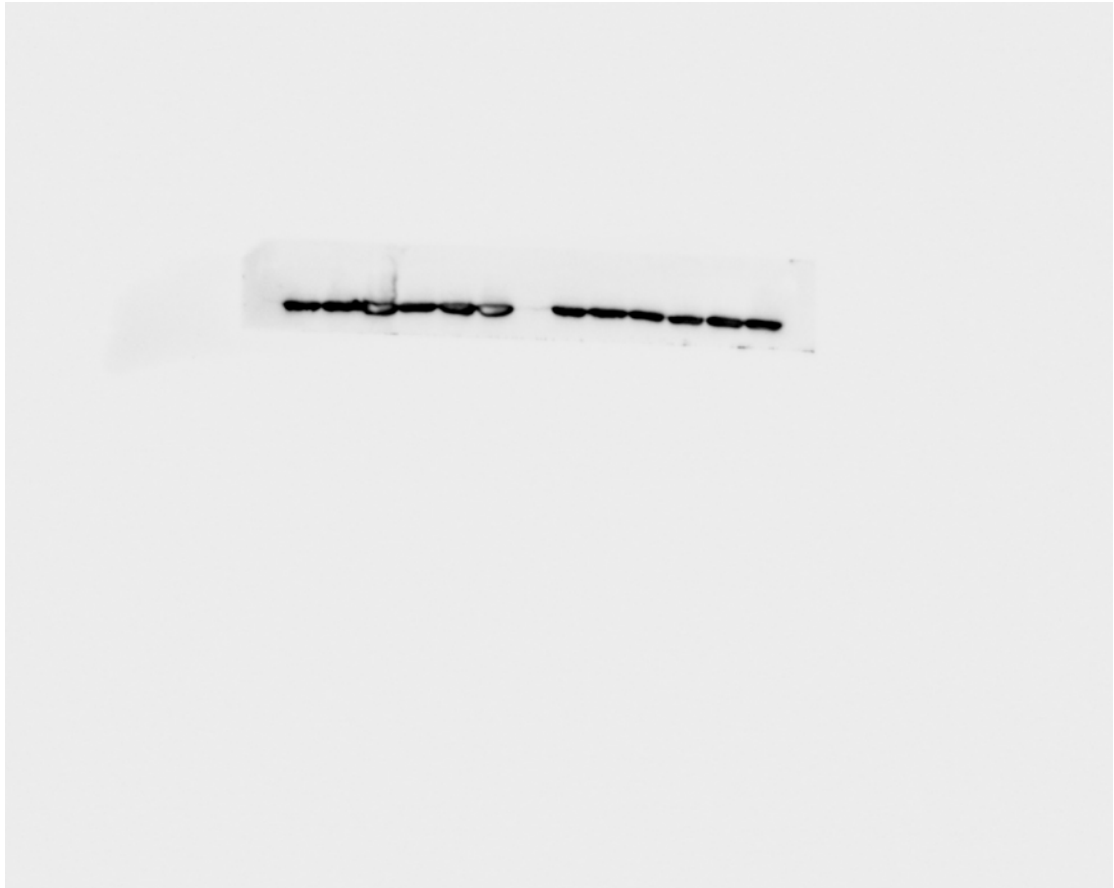

VHL

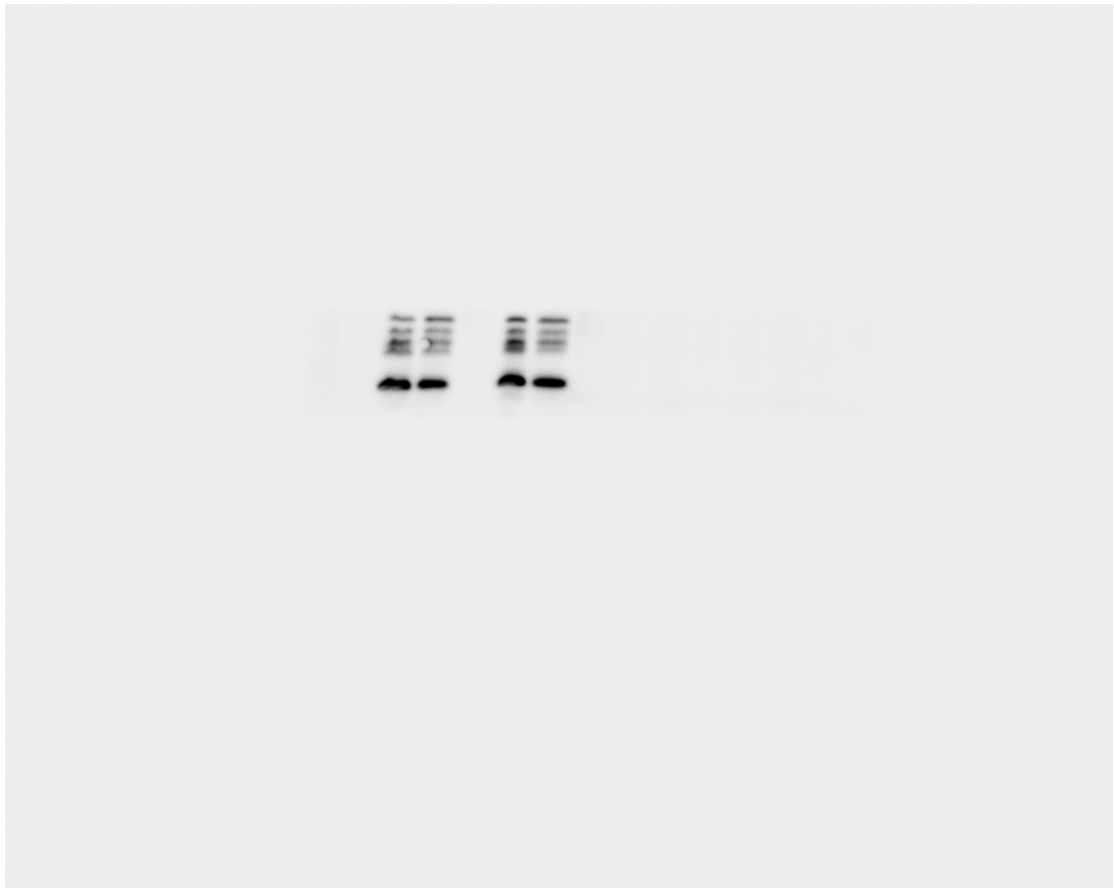

FKBP10

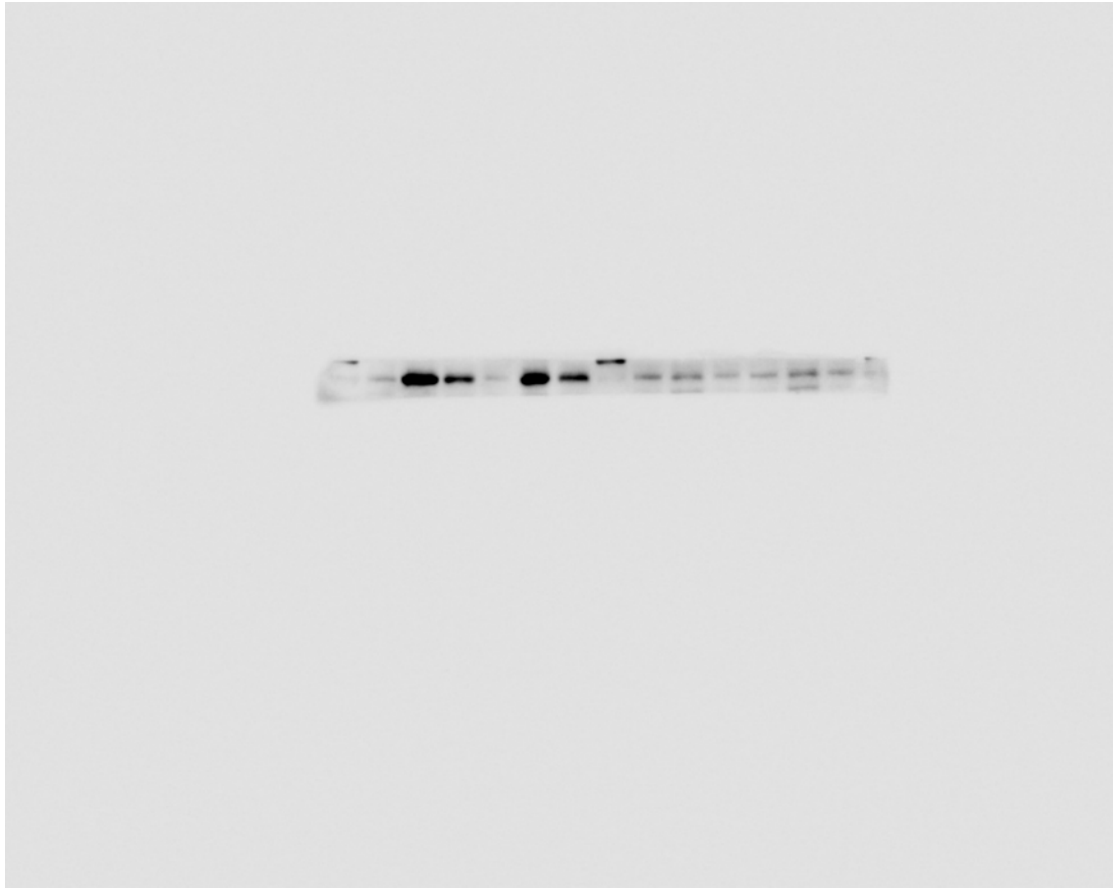

HIF2a

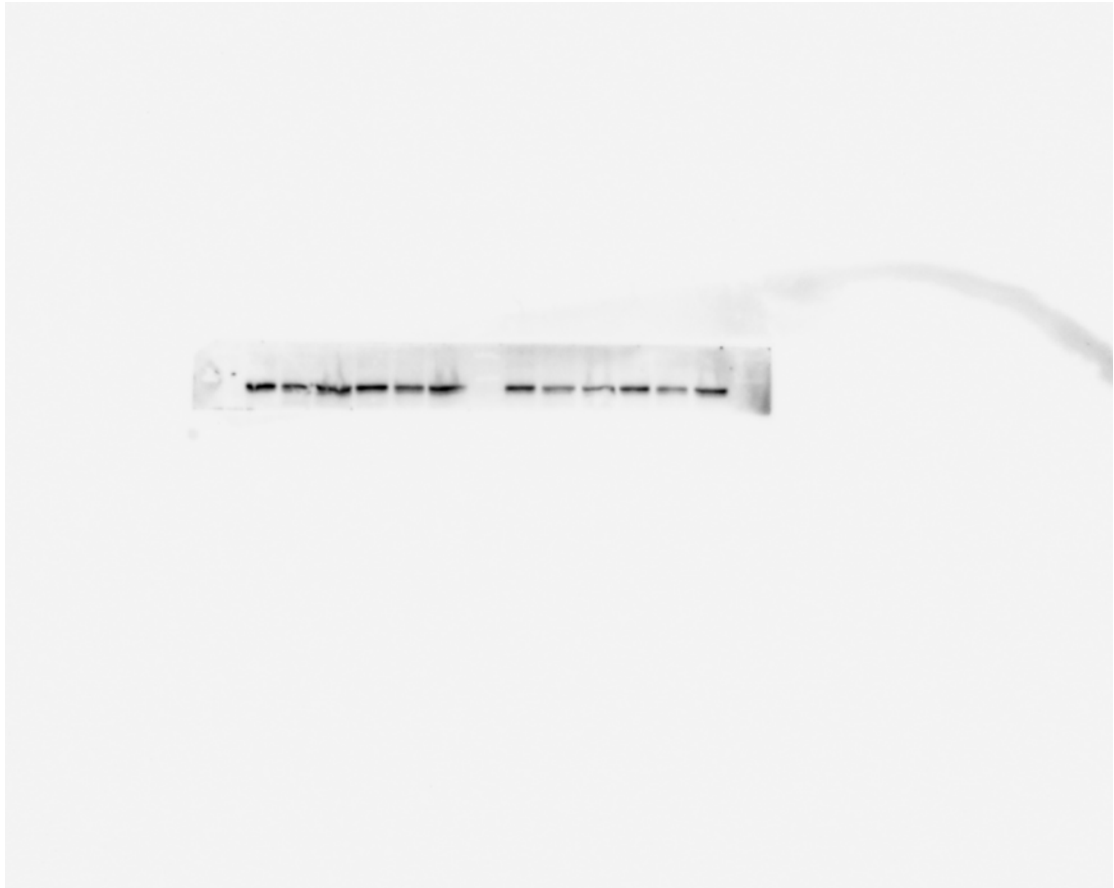

Fig. 7D  
Actin

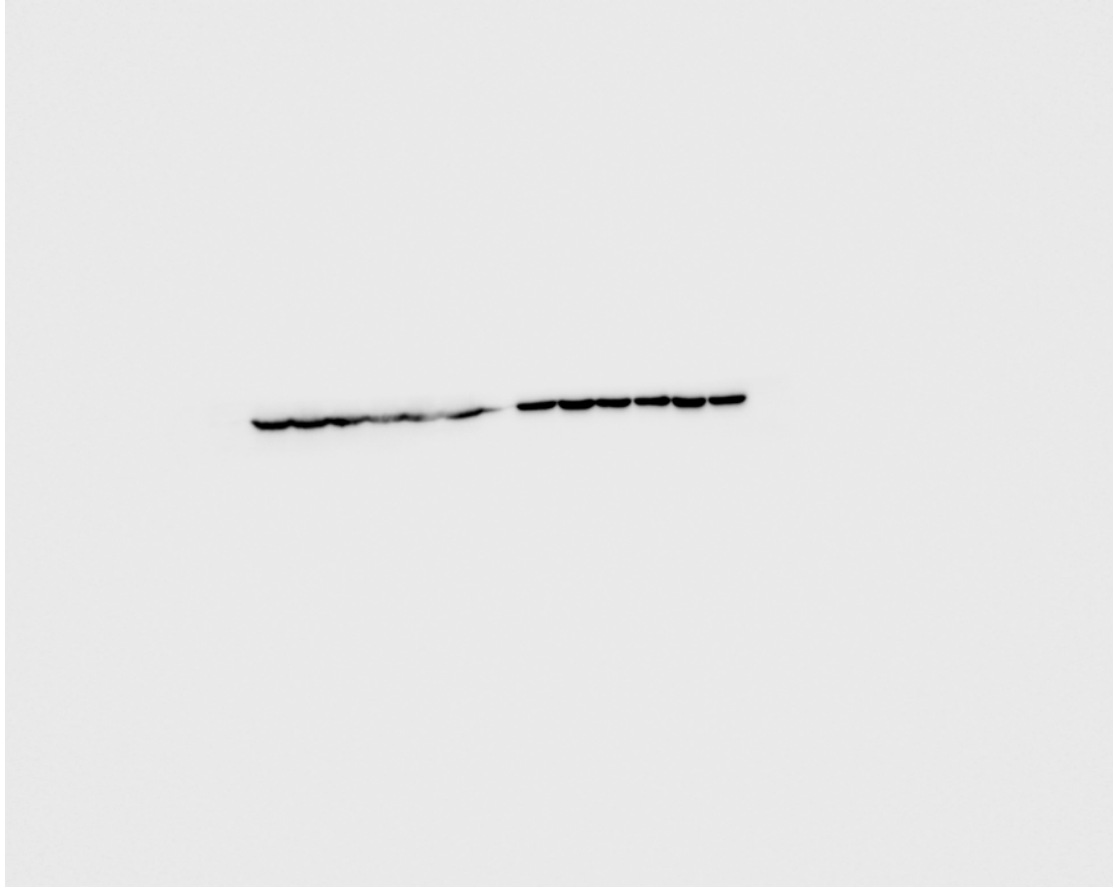

FKBP10  
HIF2a

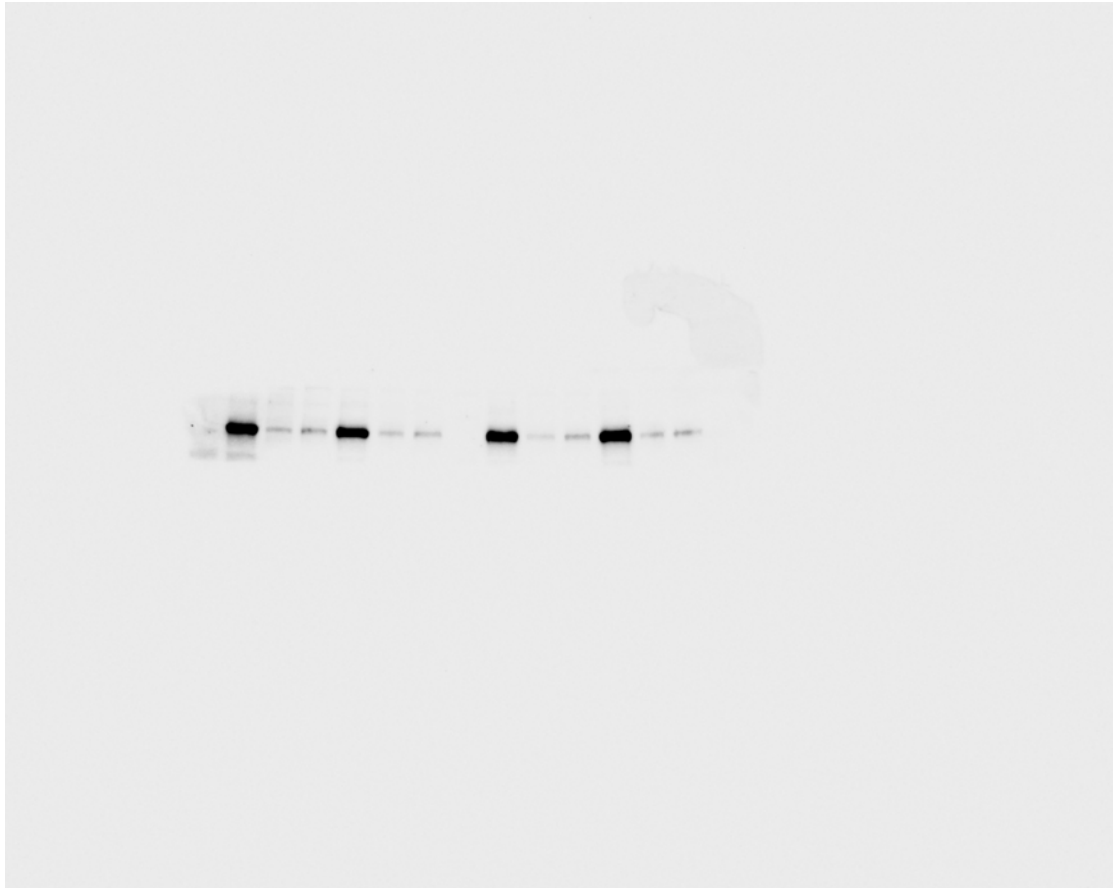

Fig. 7E  
Actin

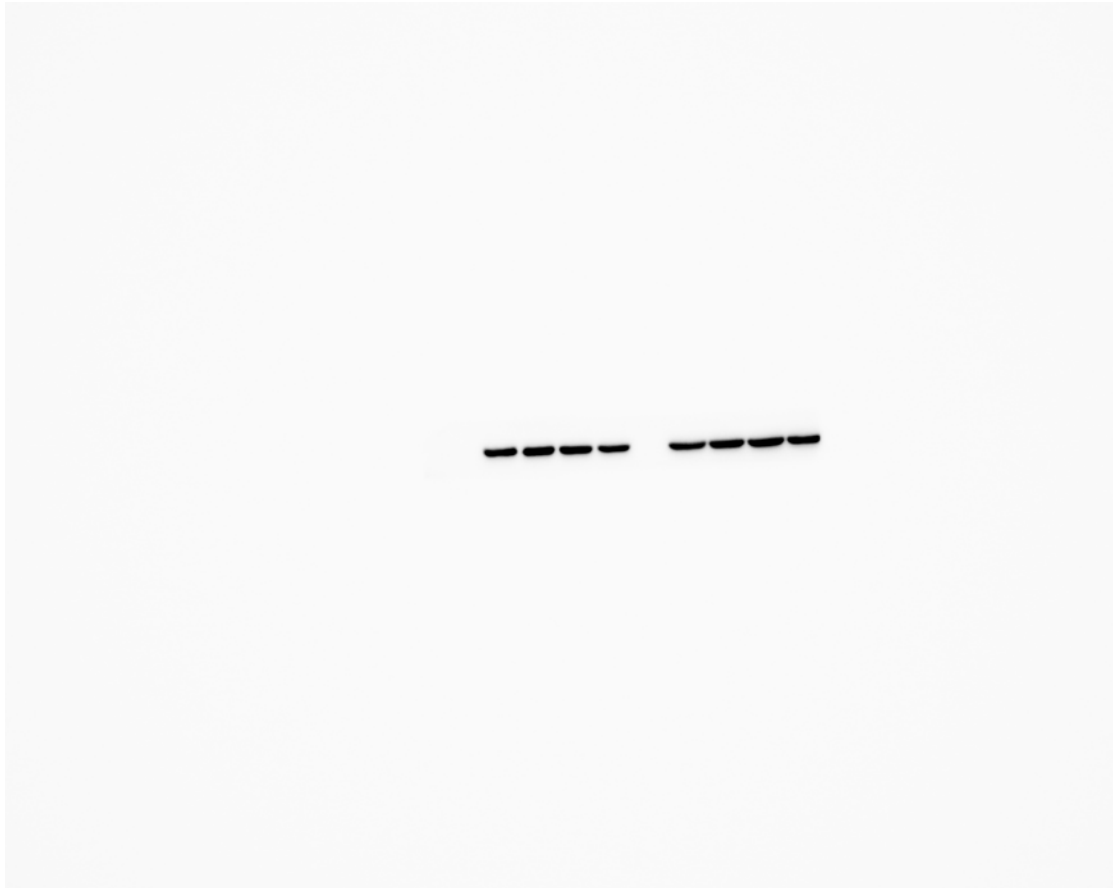

FKBP10

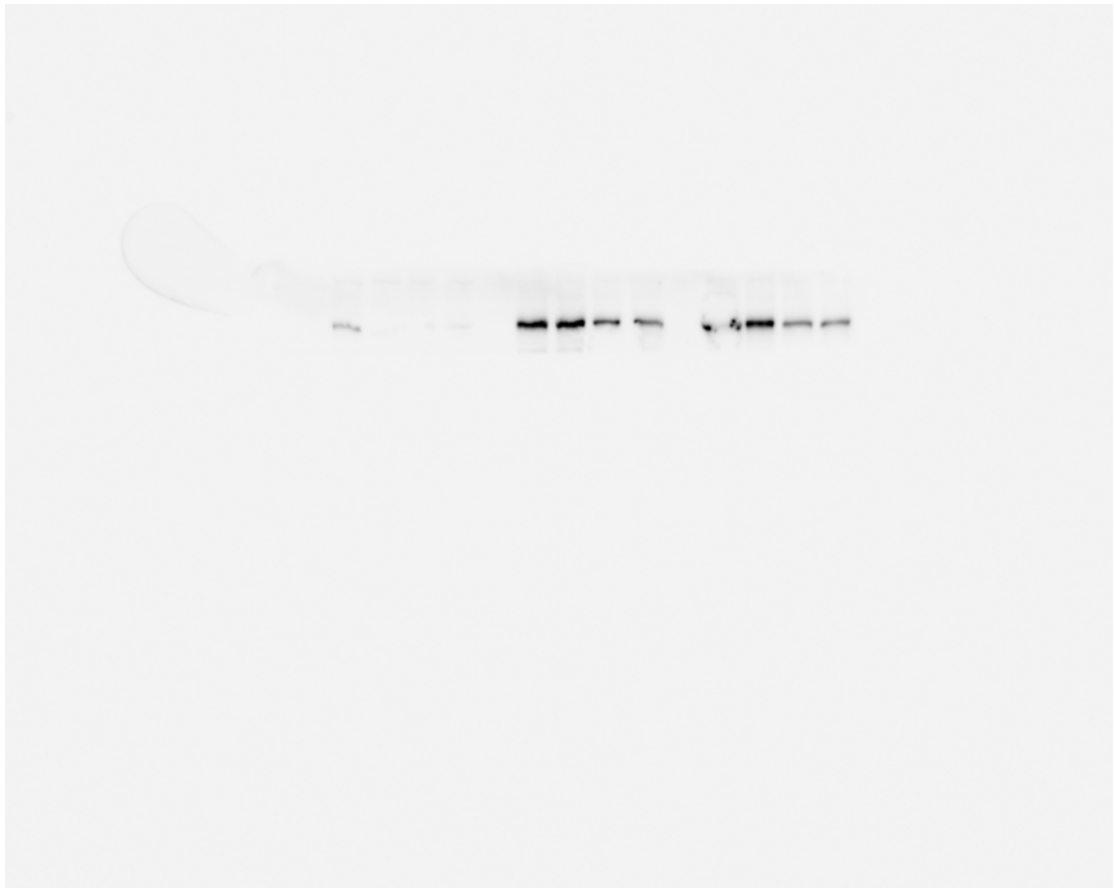



HIF1a

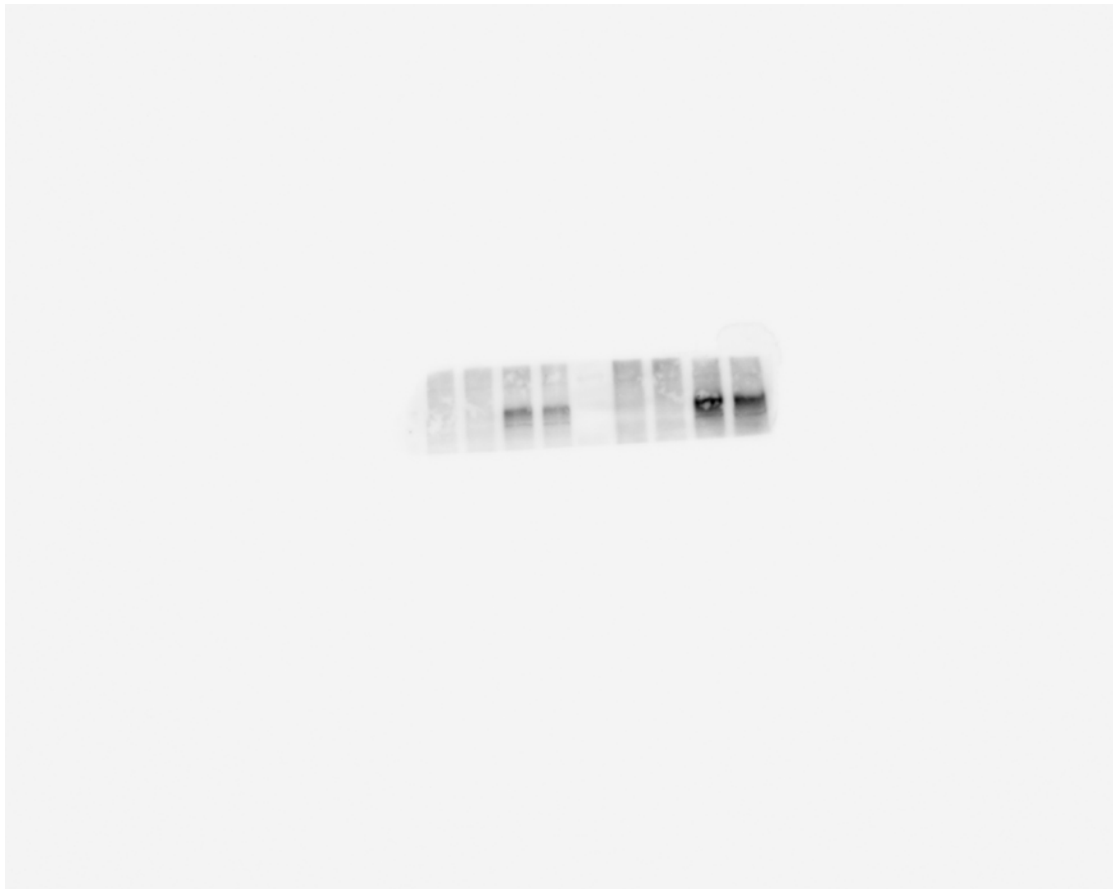

Fig. 7H  
Actin

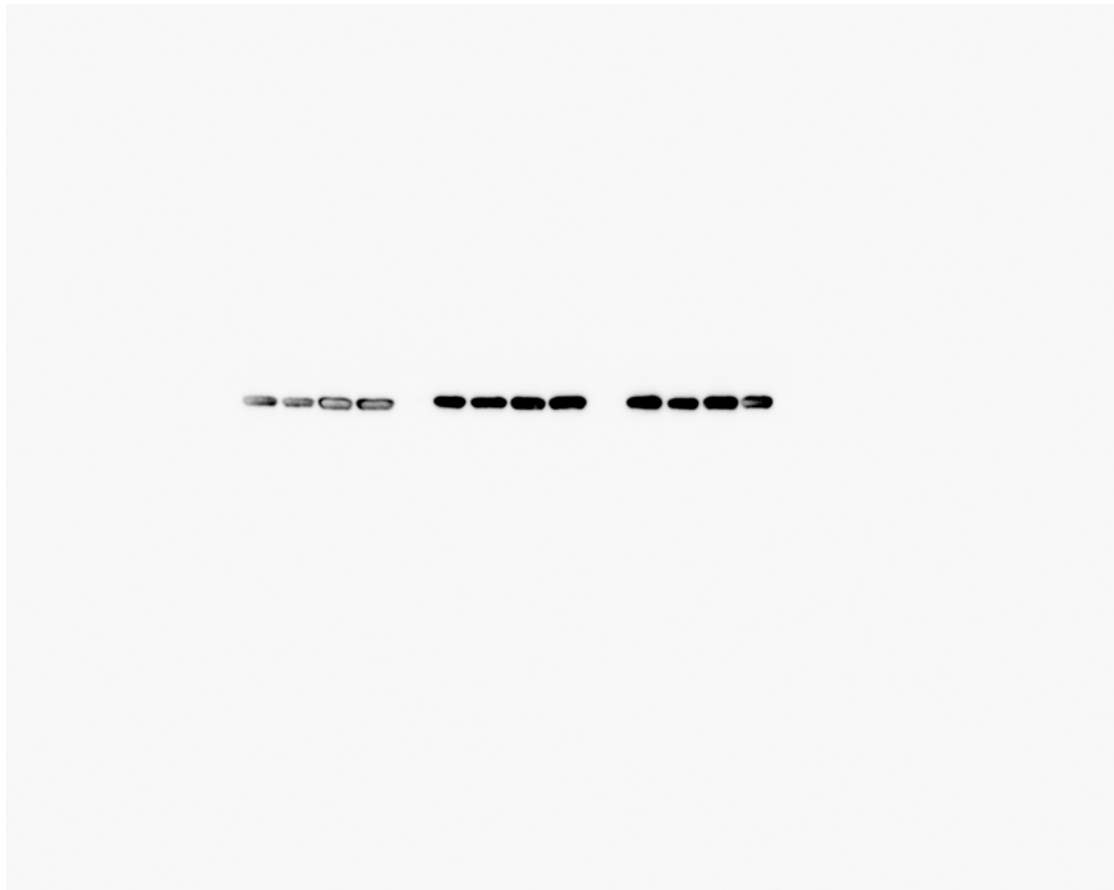

FKBP10

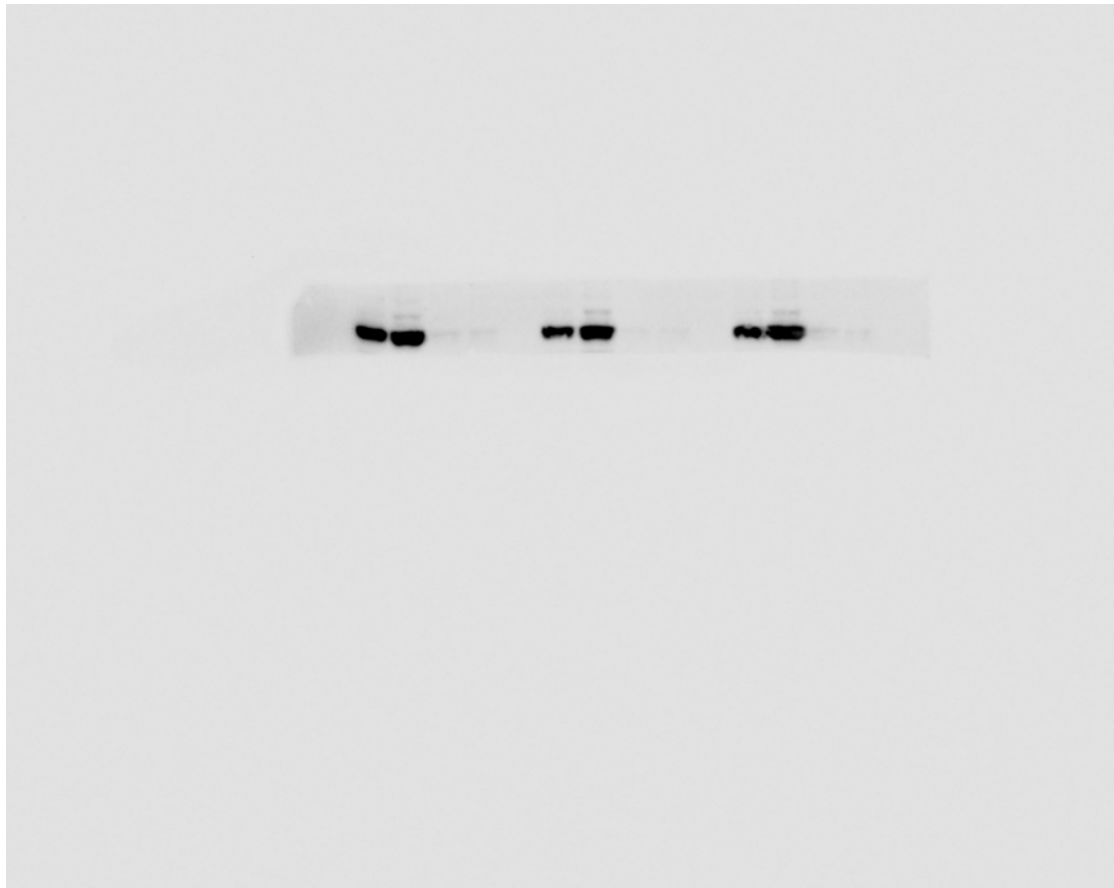

LDHA

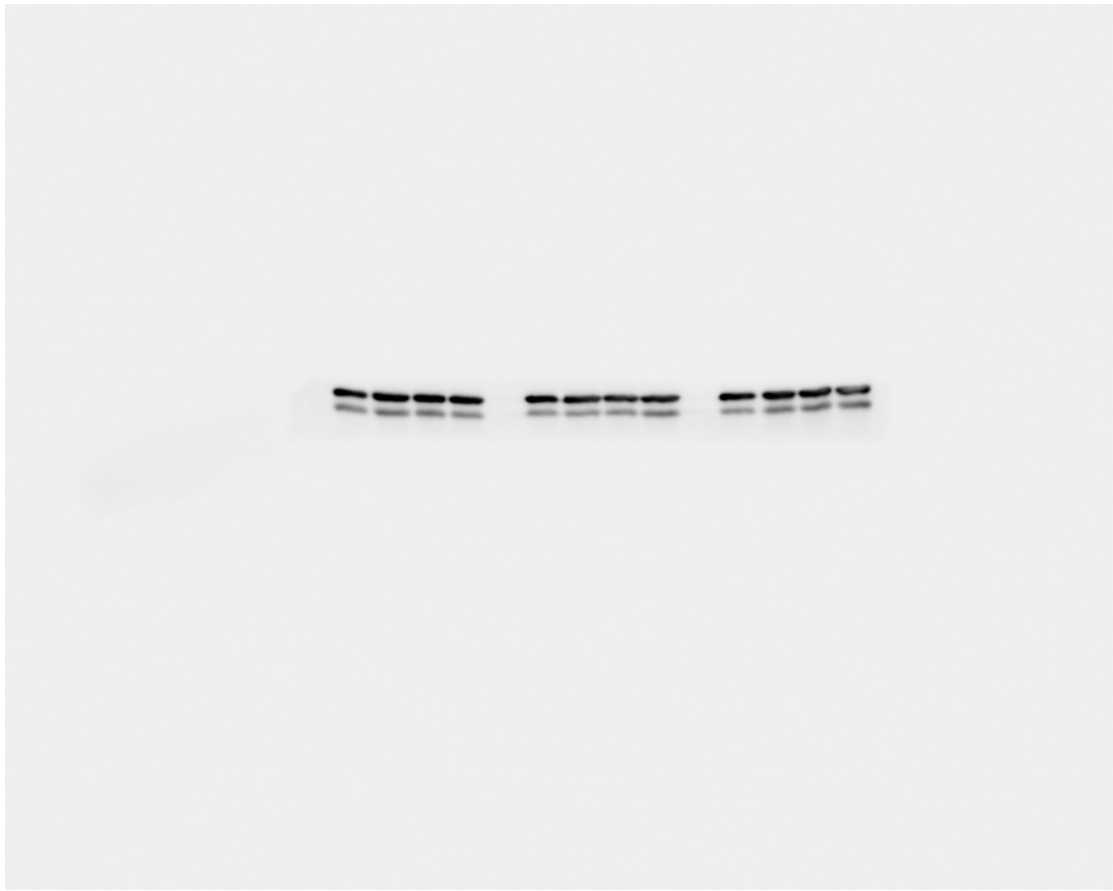

pLDHA

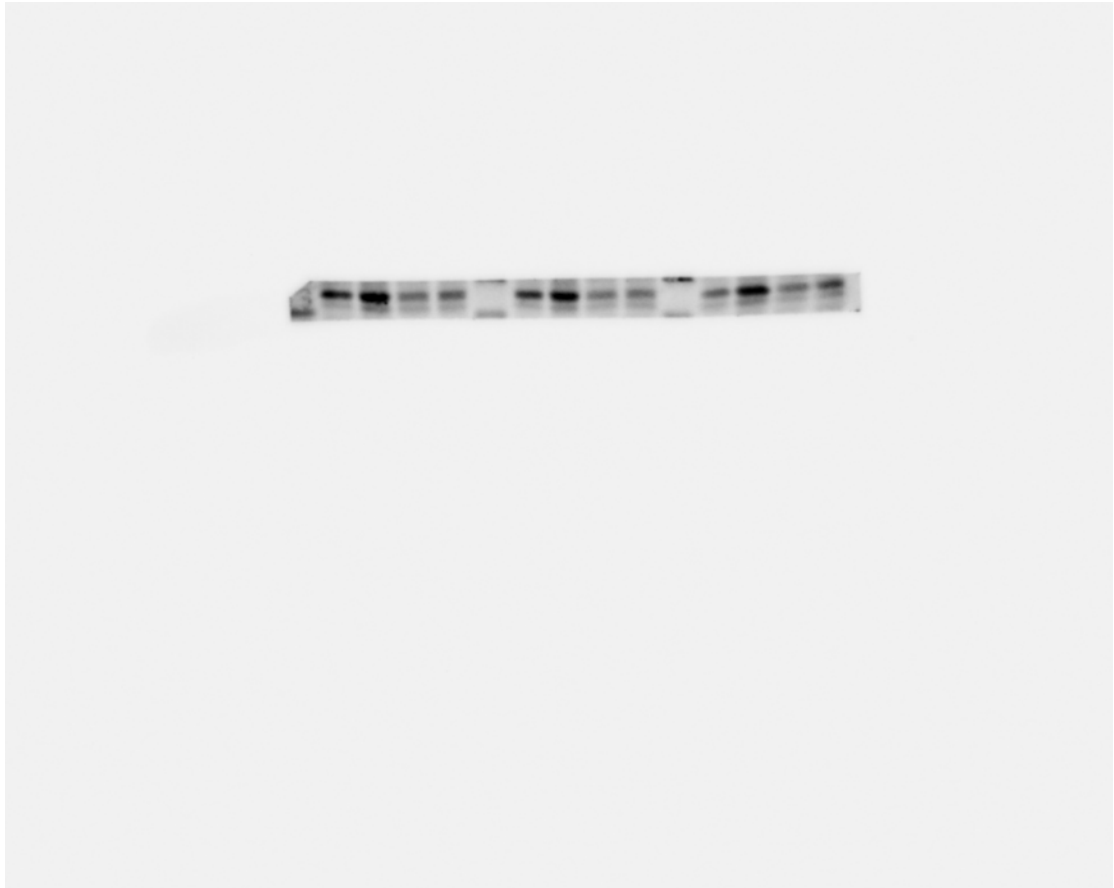

HIF2a

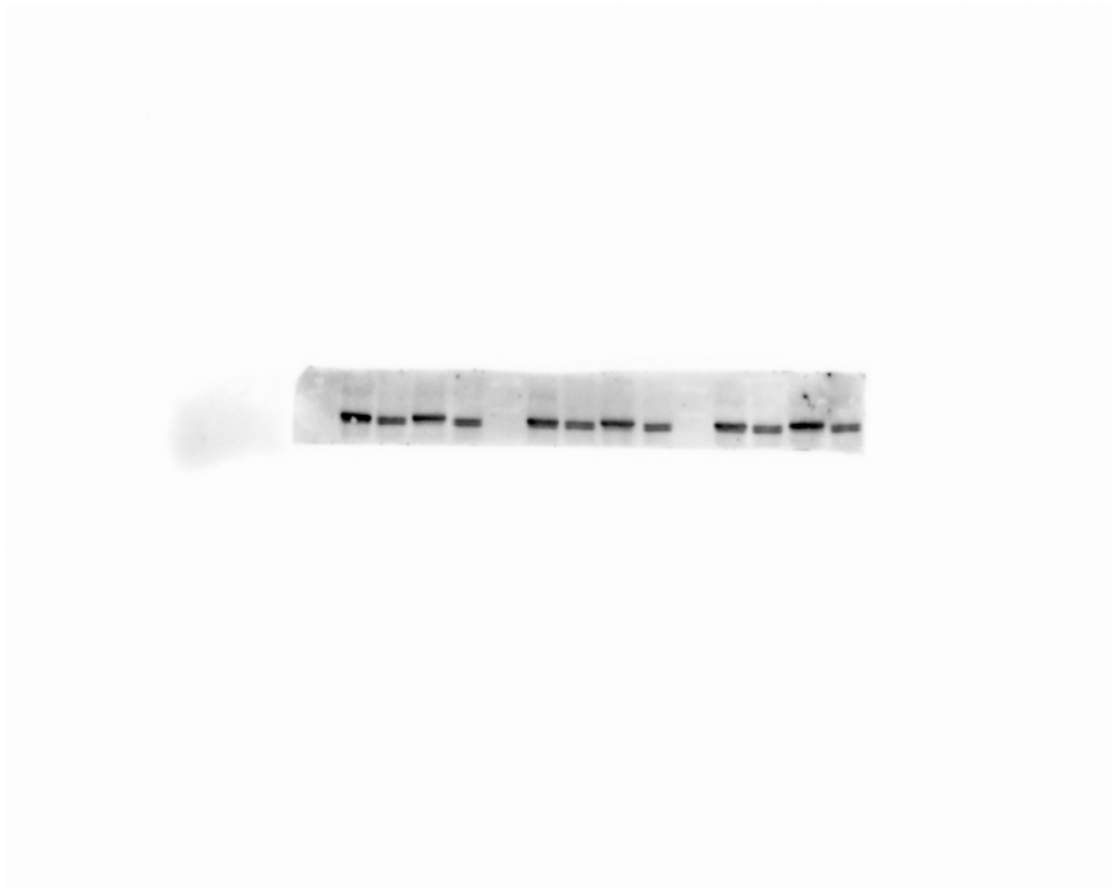

Fig. S1E  
Actin

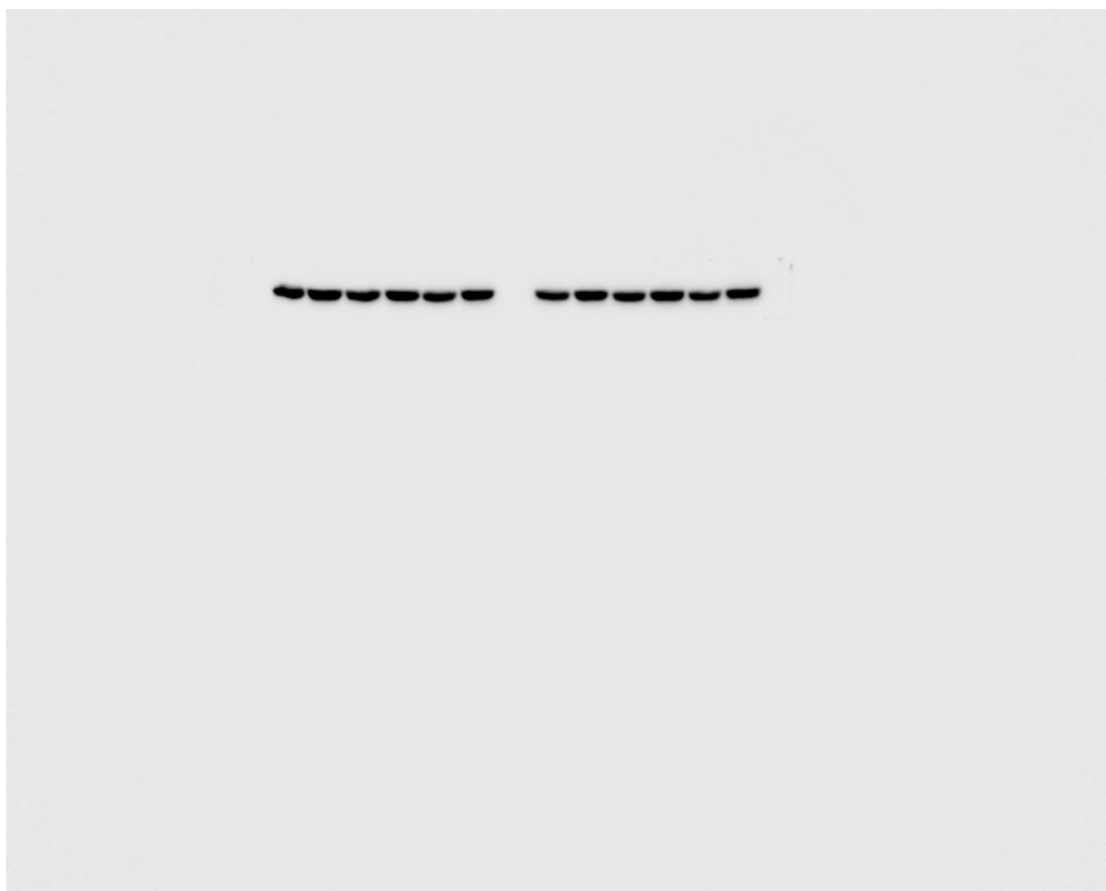

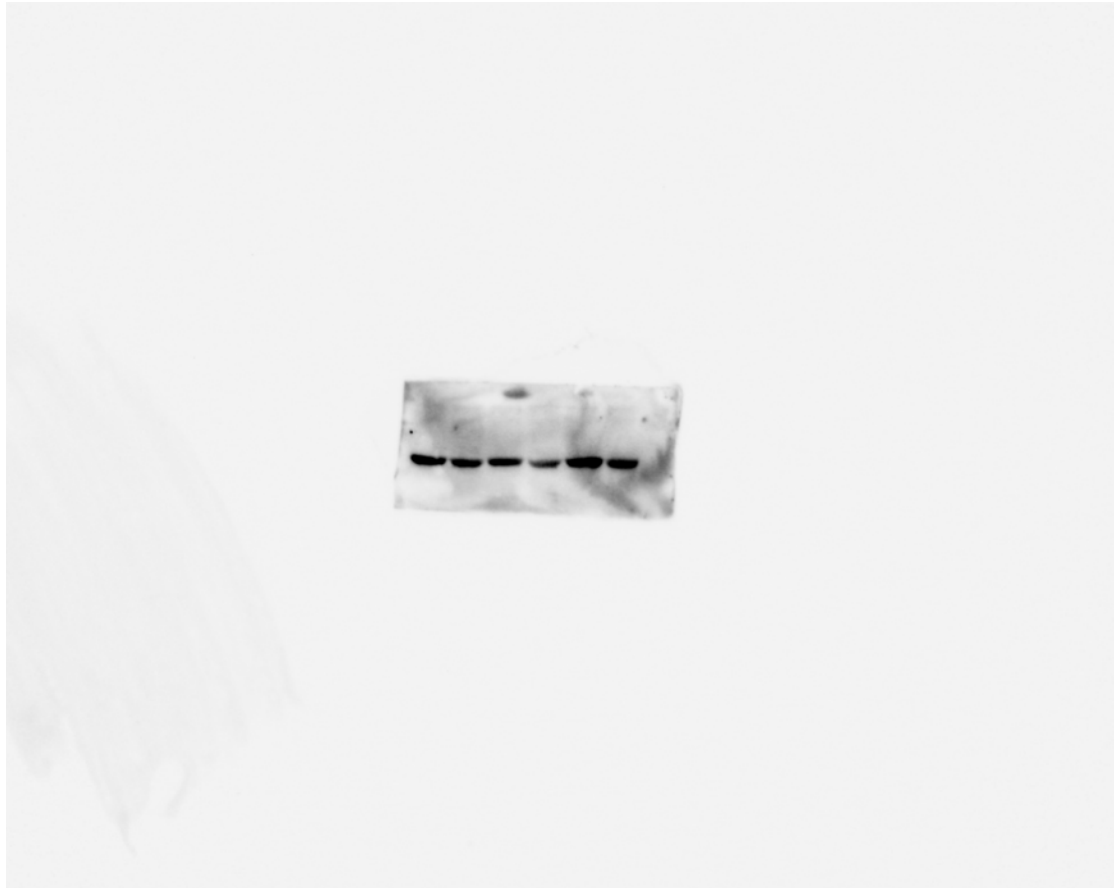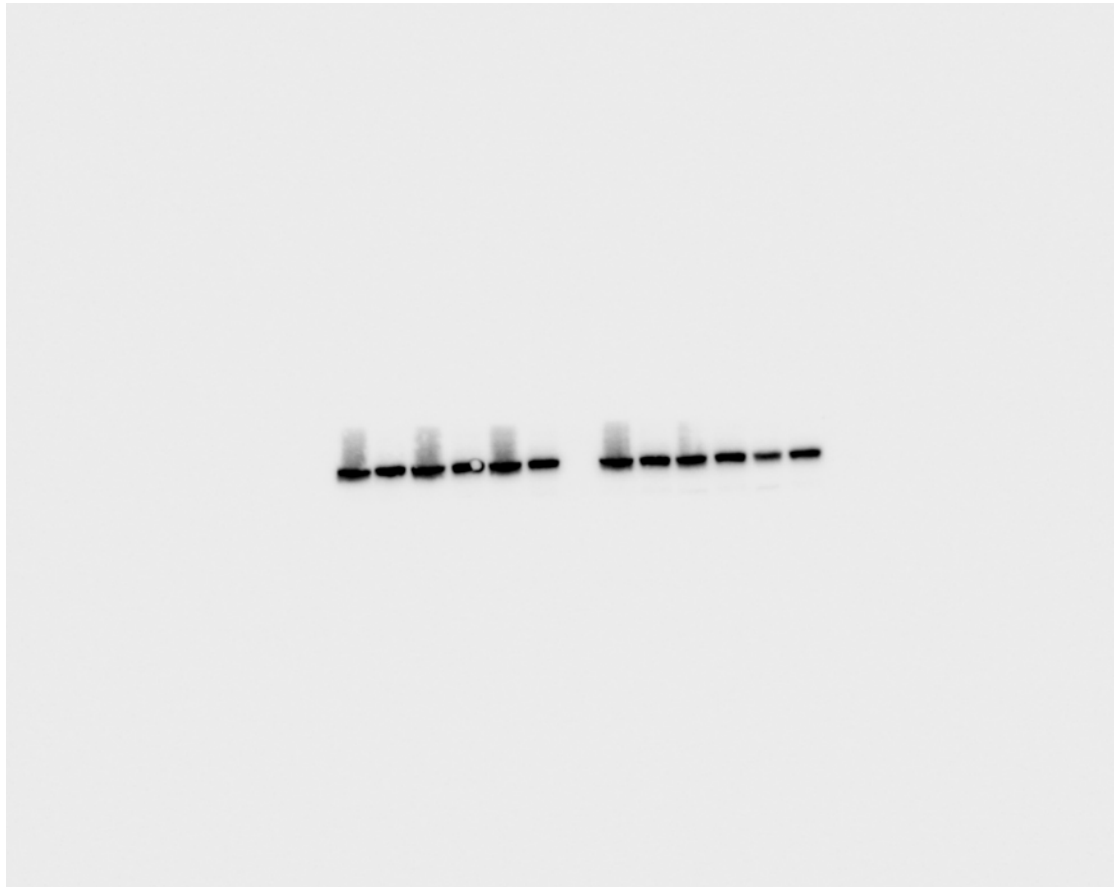

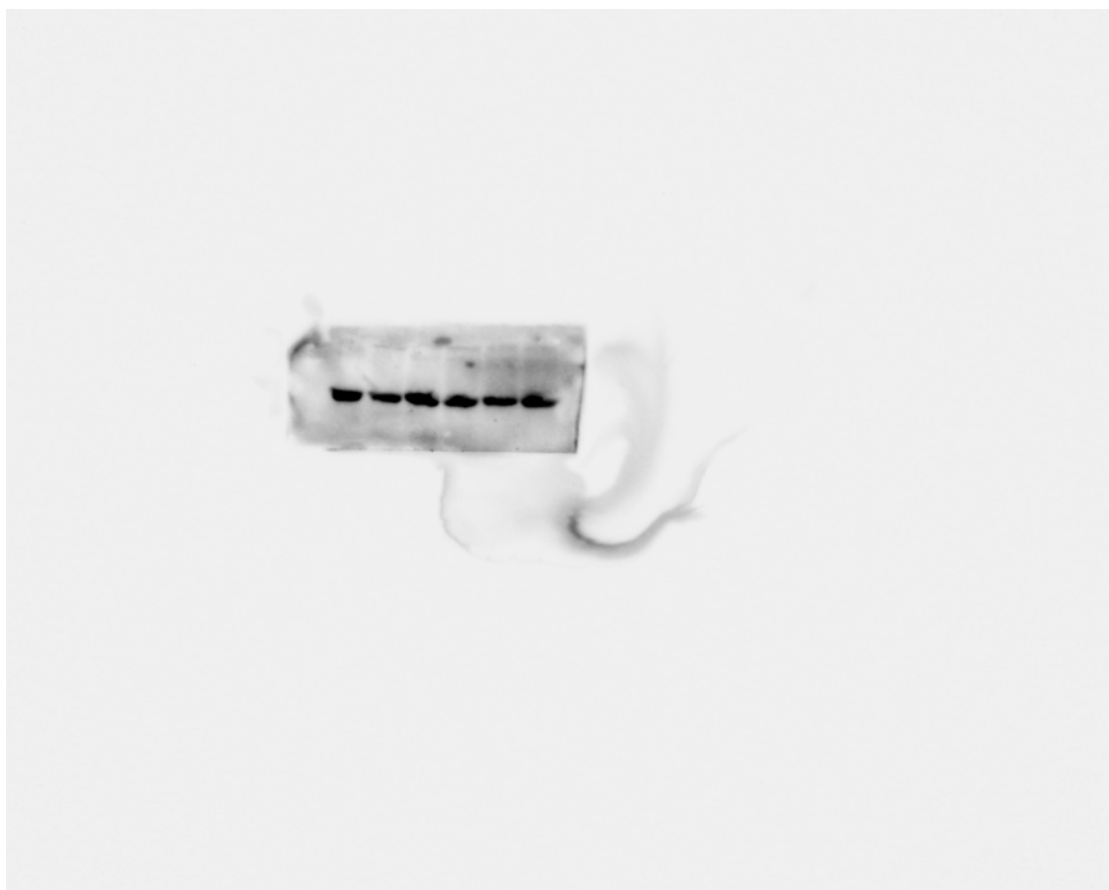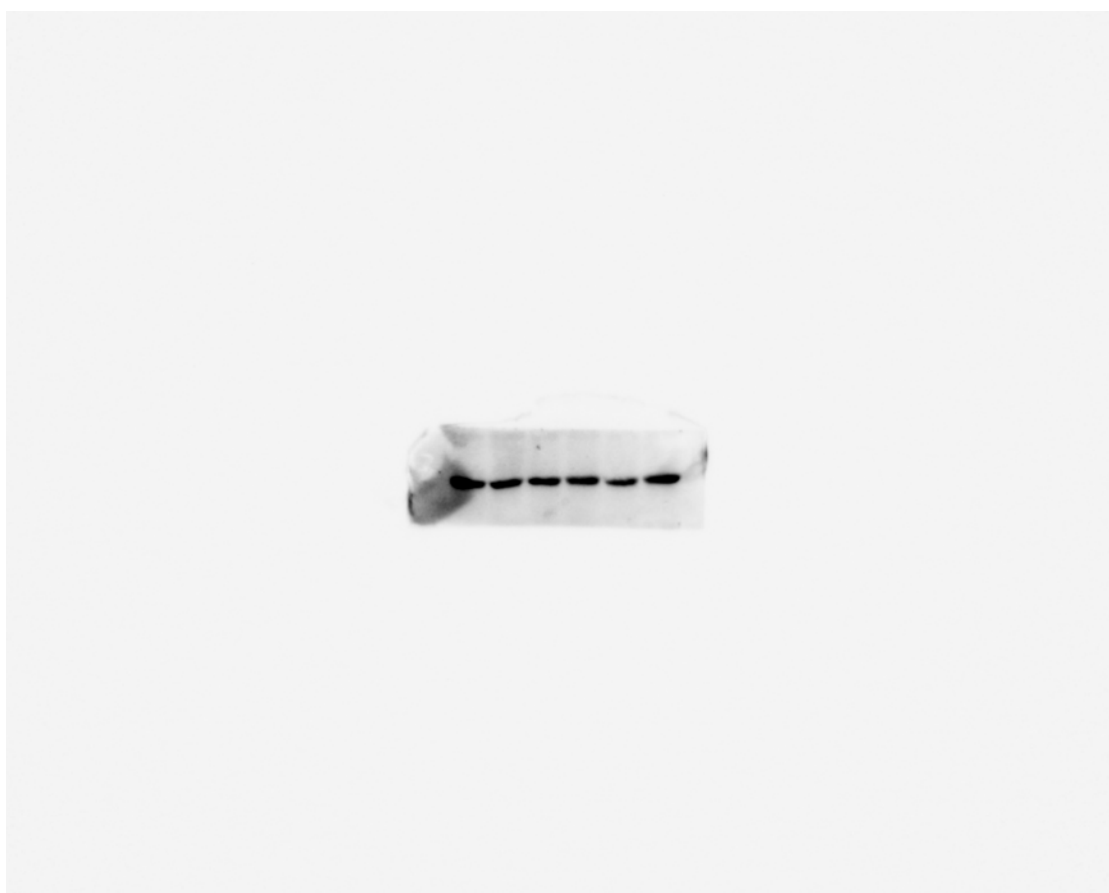

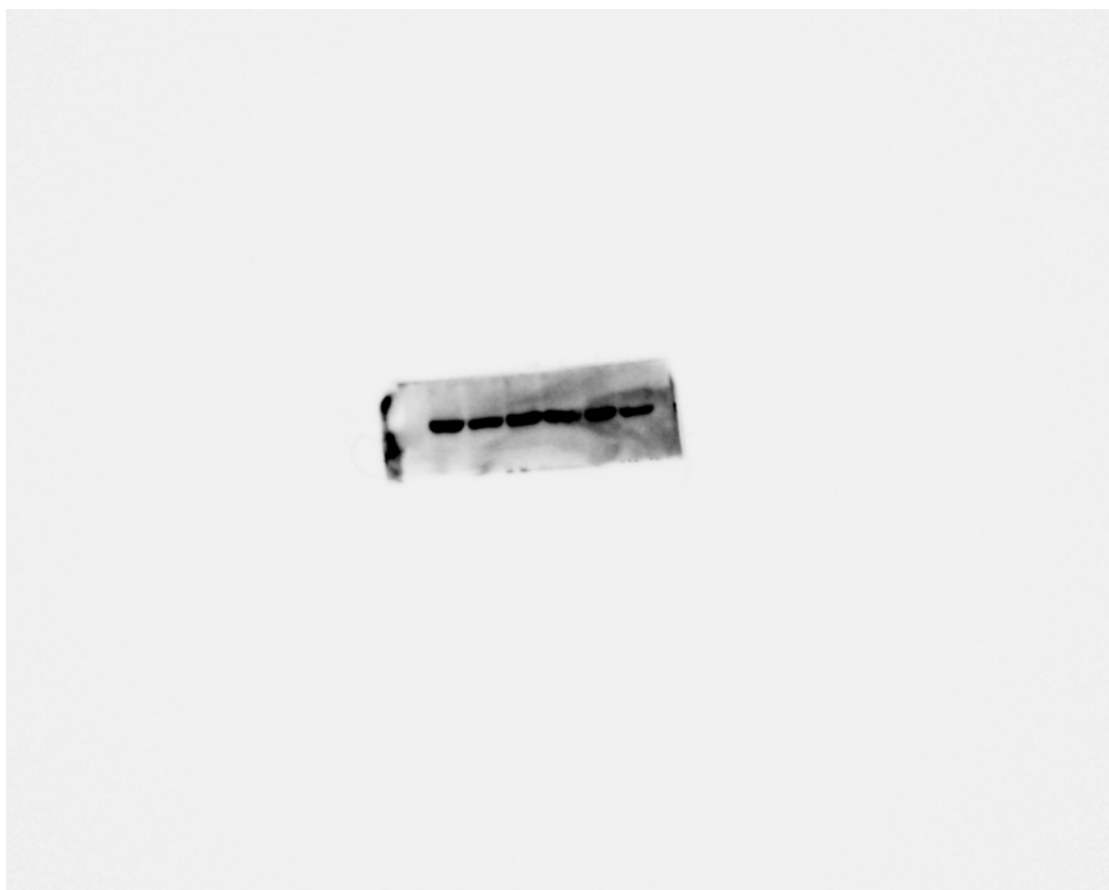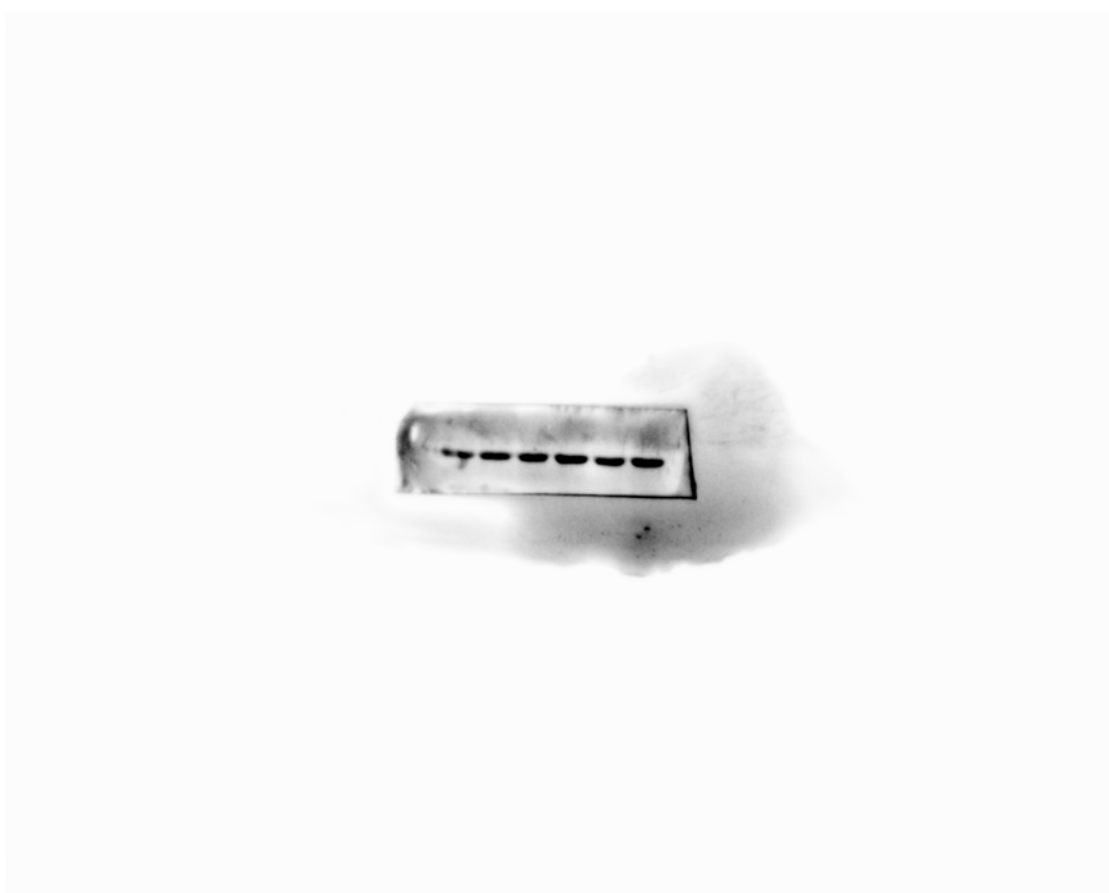



FKBP10

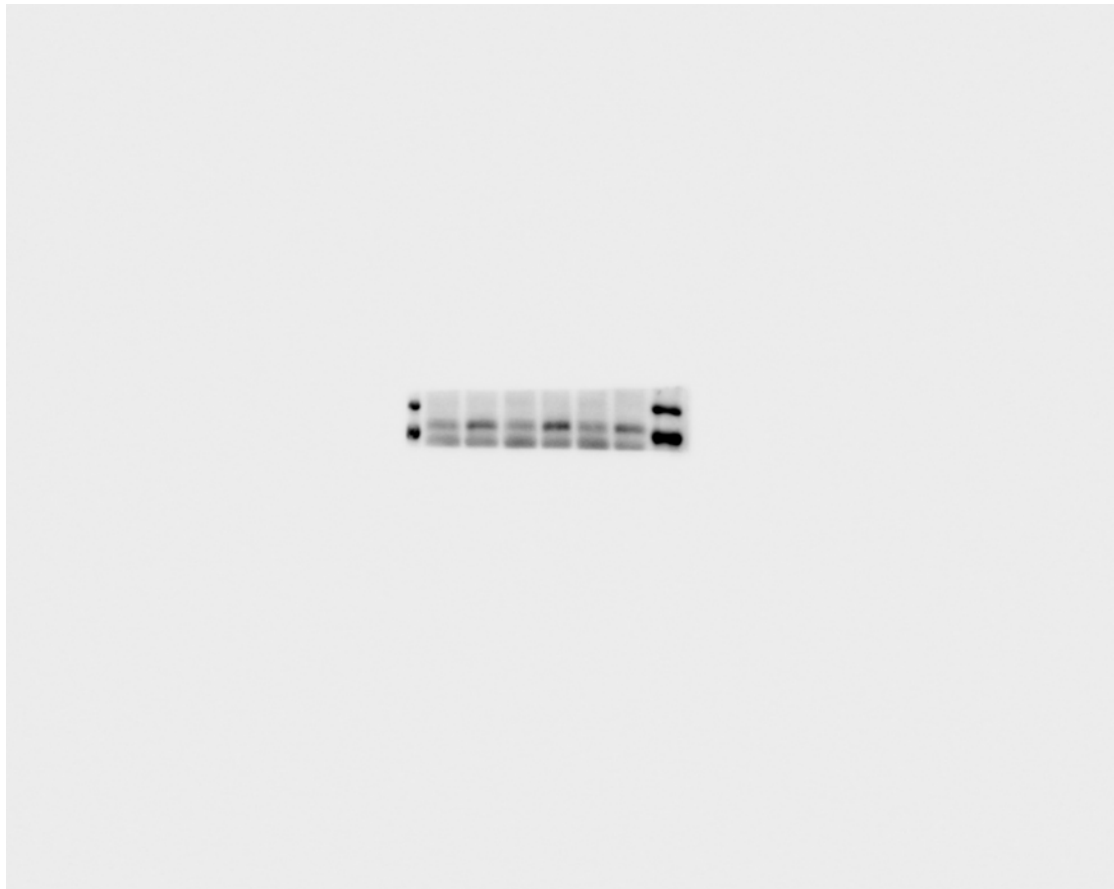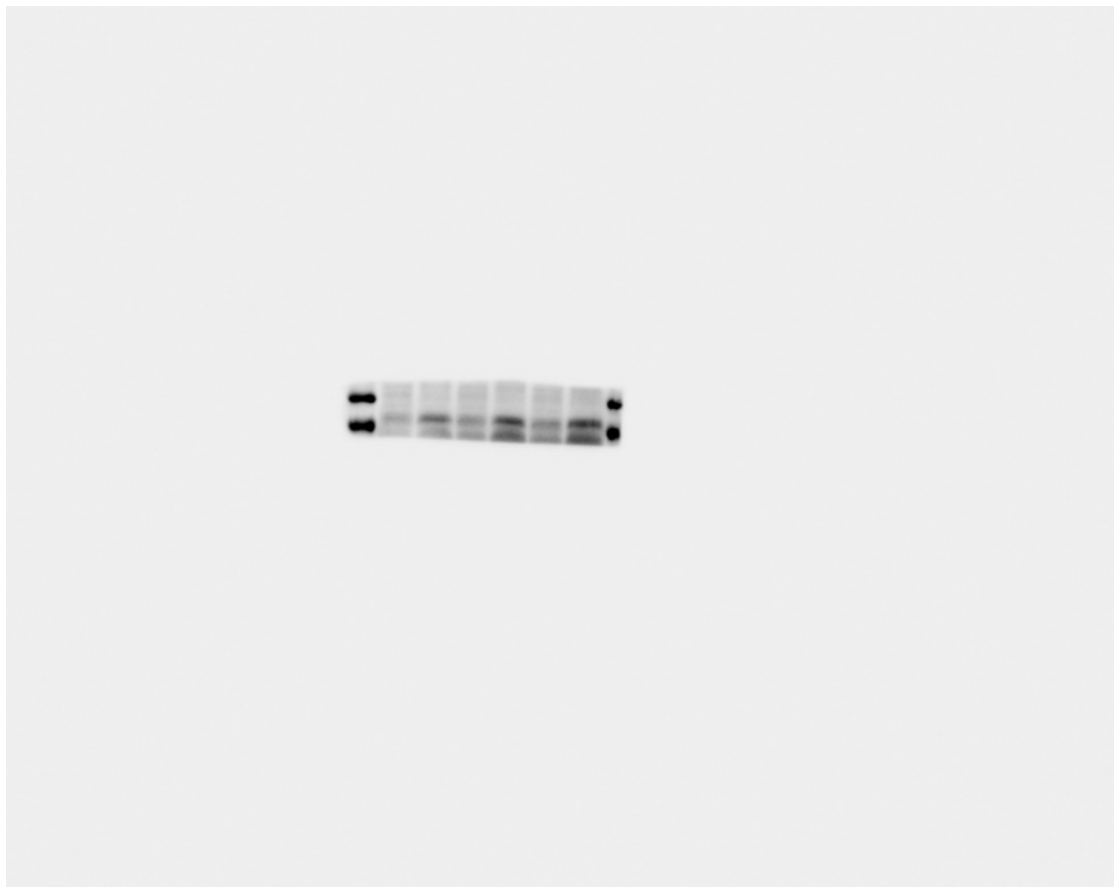

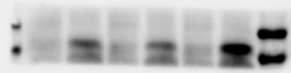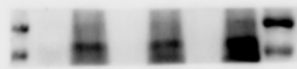

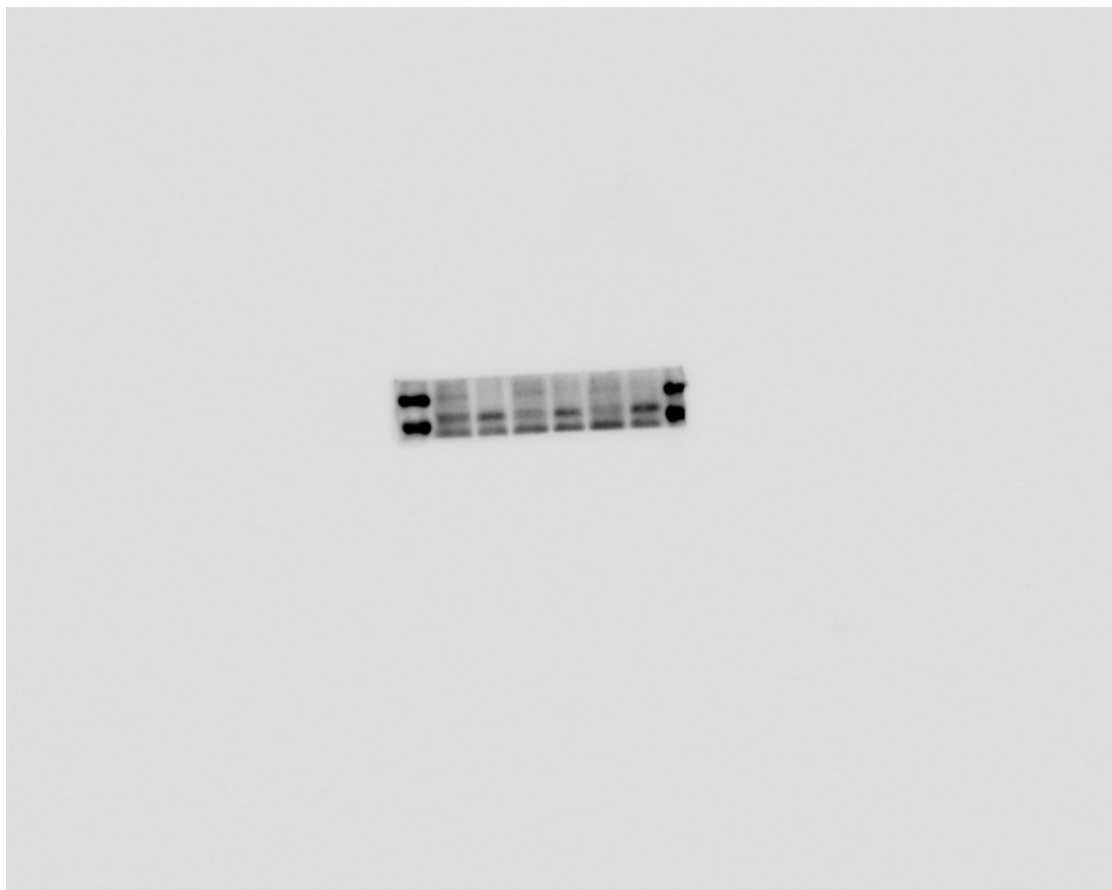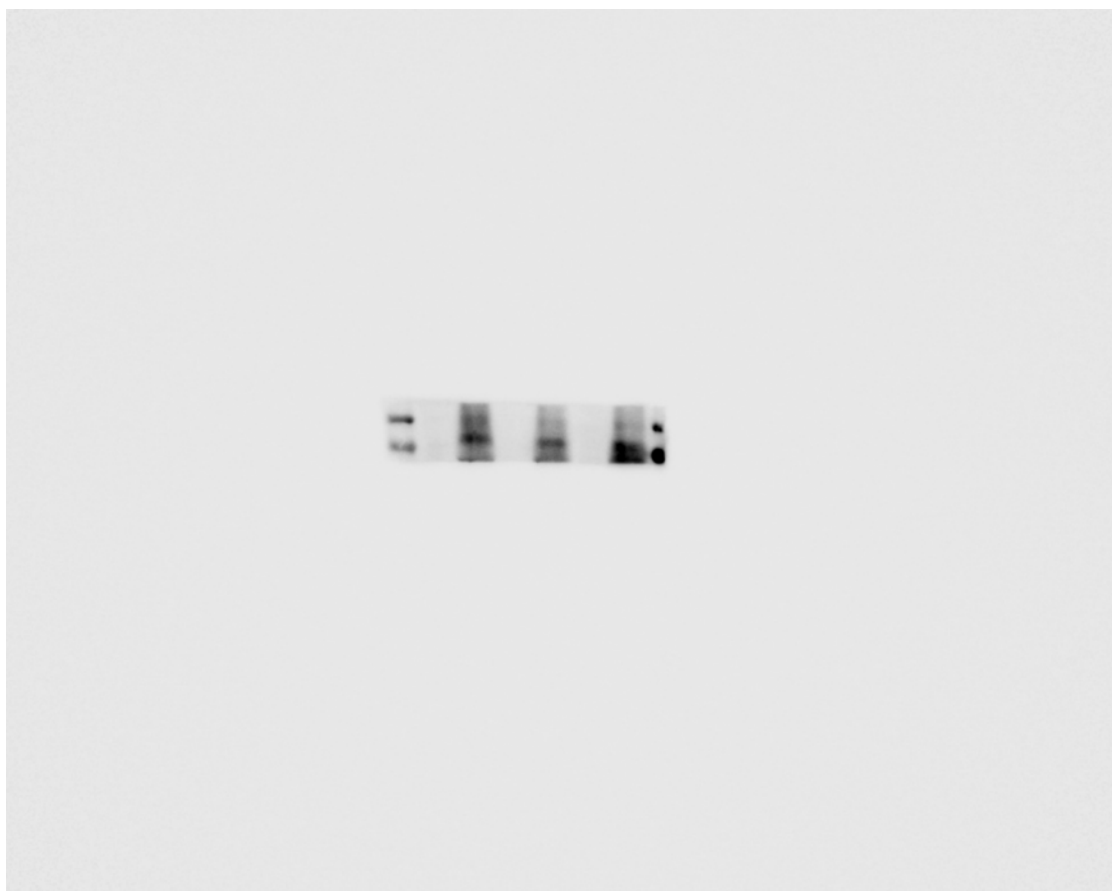

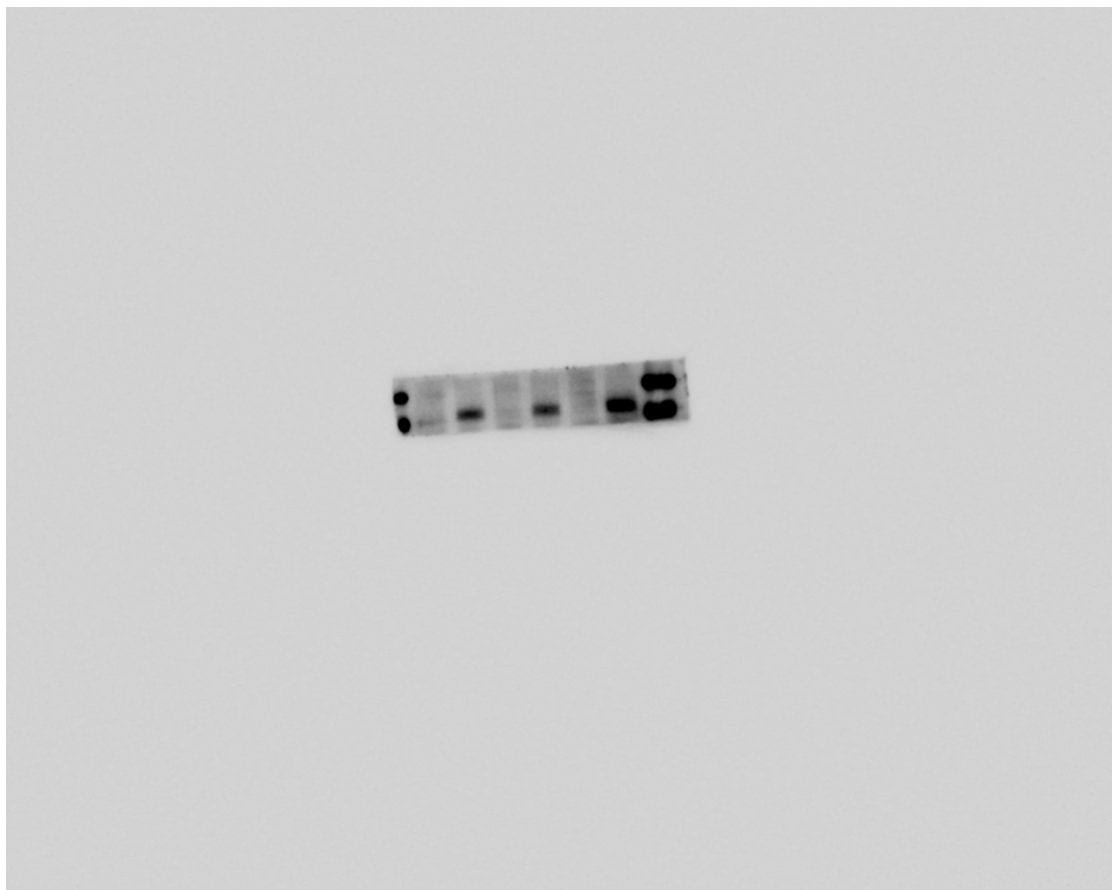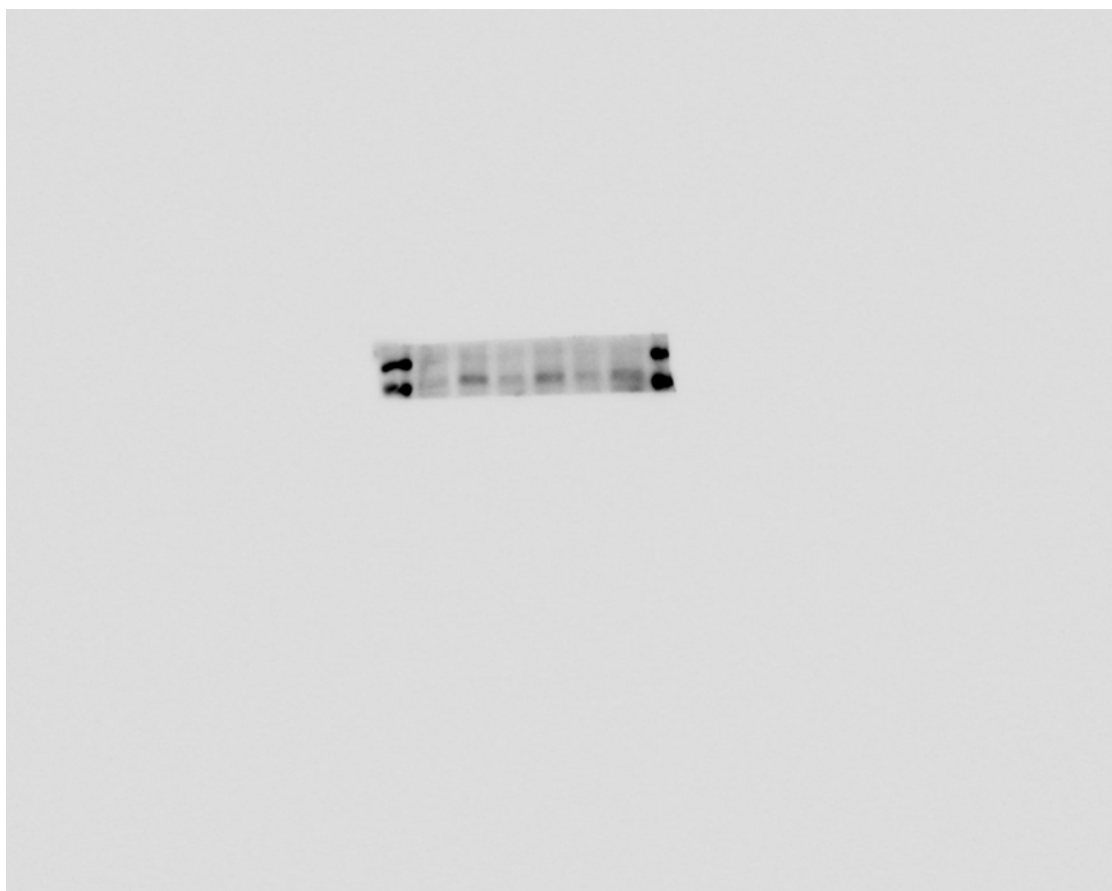

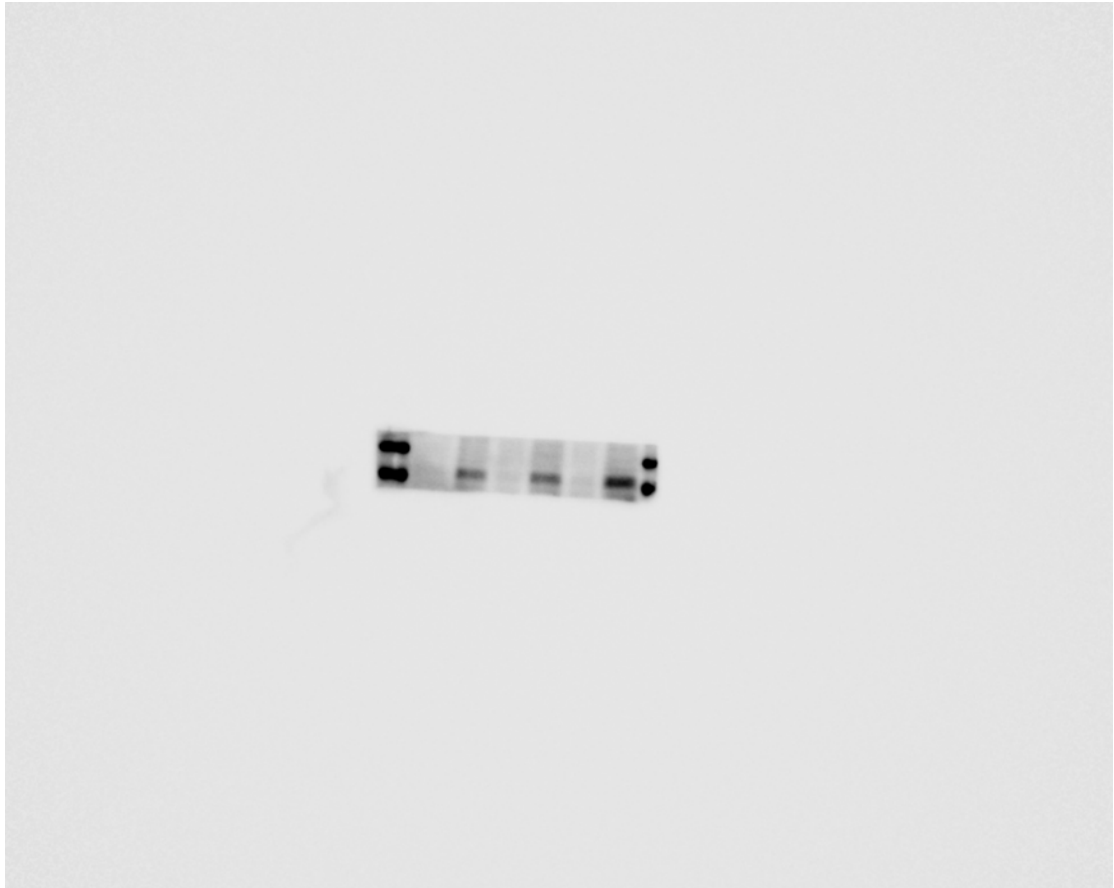

Fig. S1F  
Actin

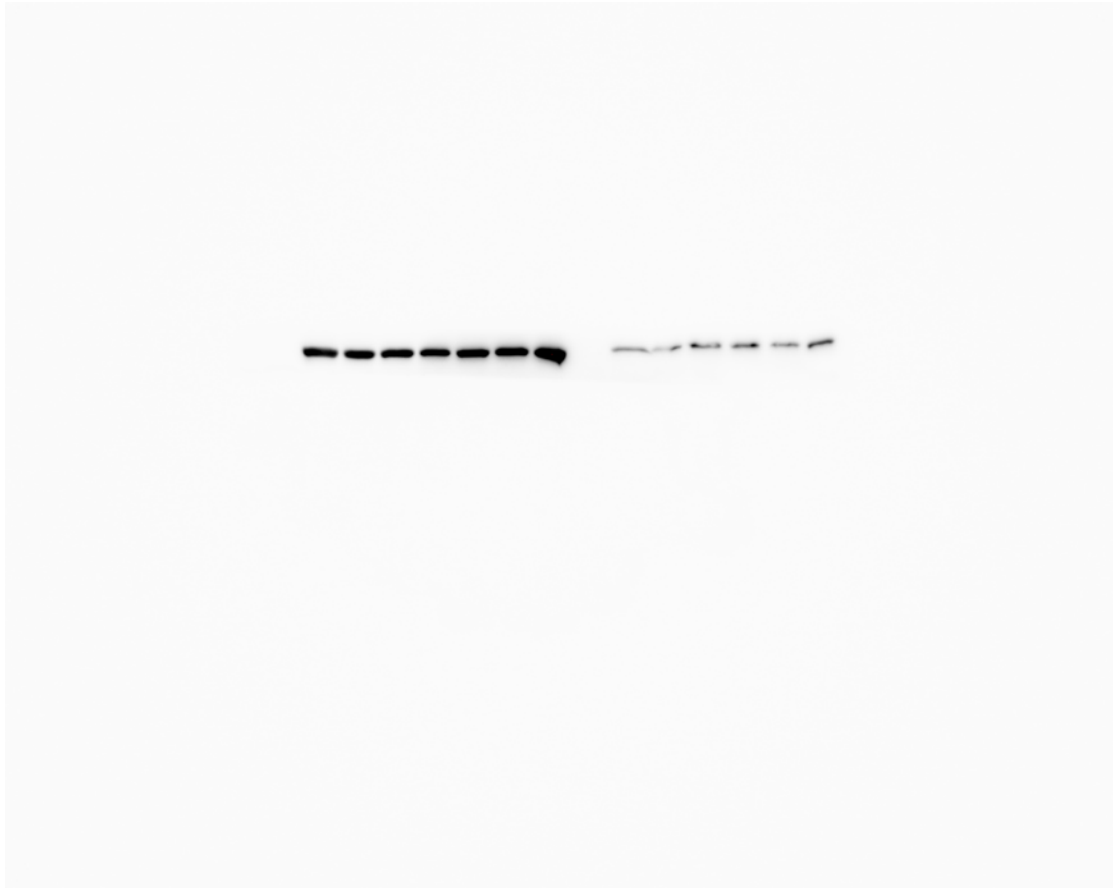

FKBP10

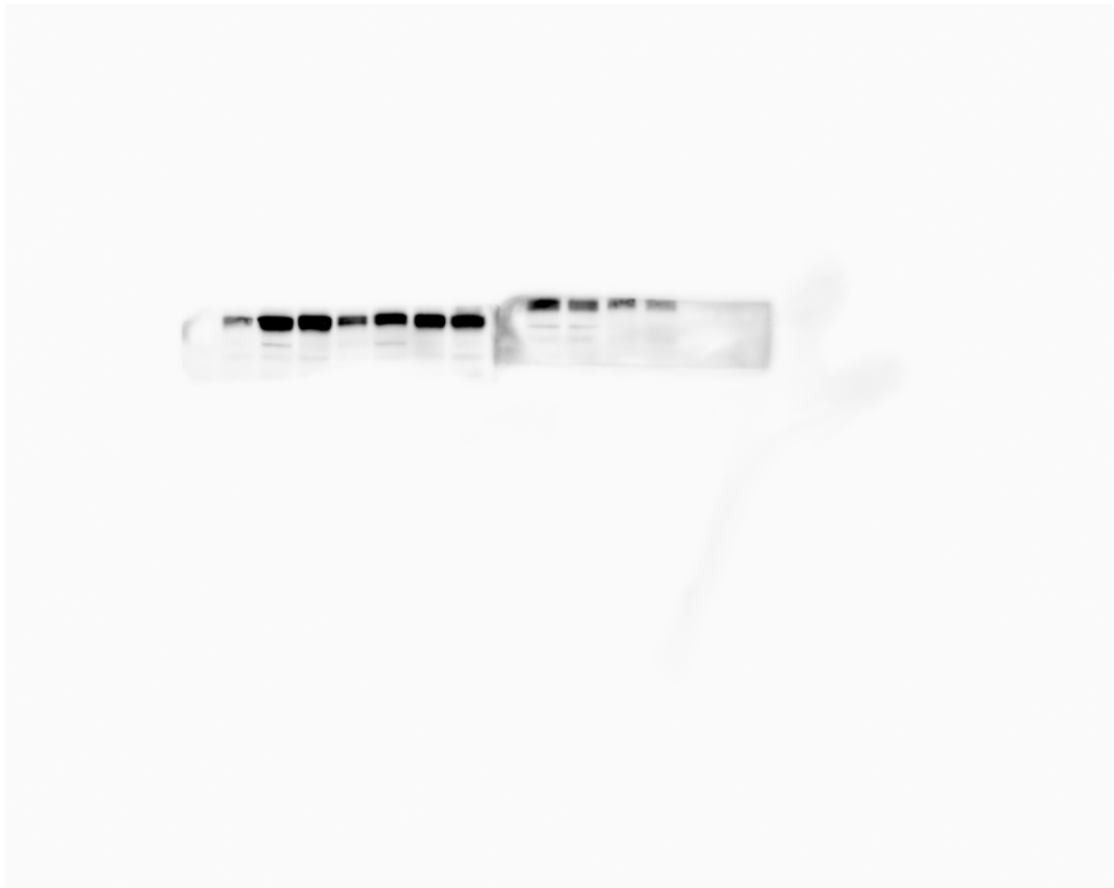

Fig. S2A  
Actin

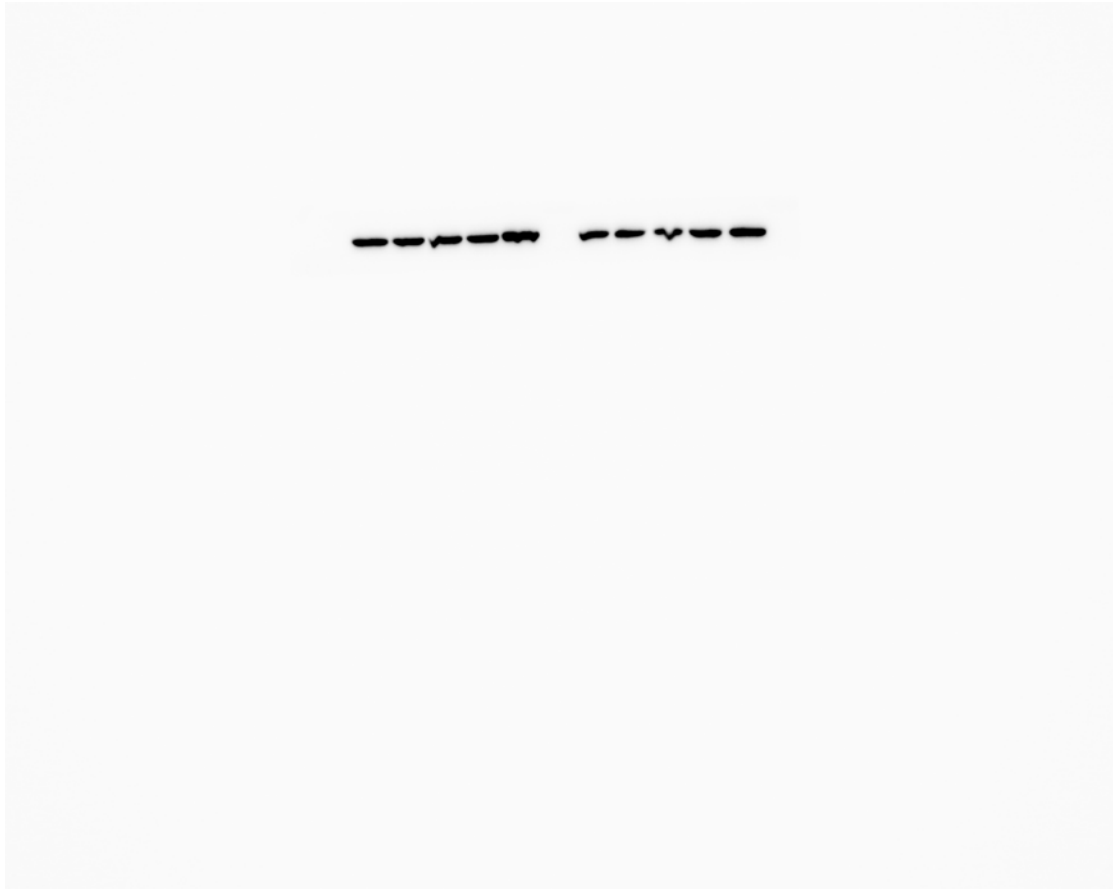

FKBP10

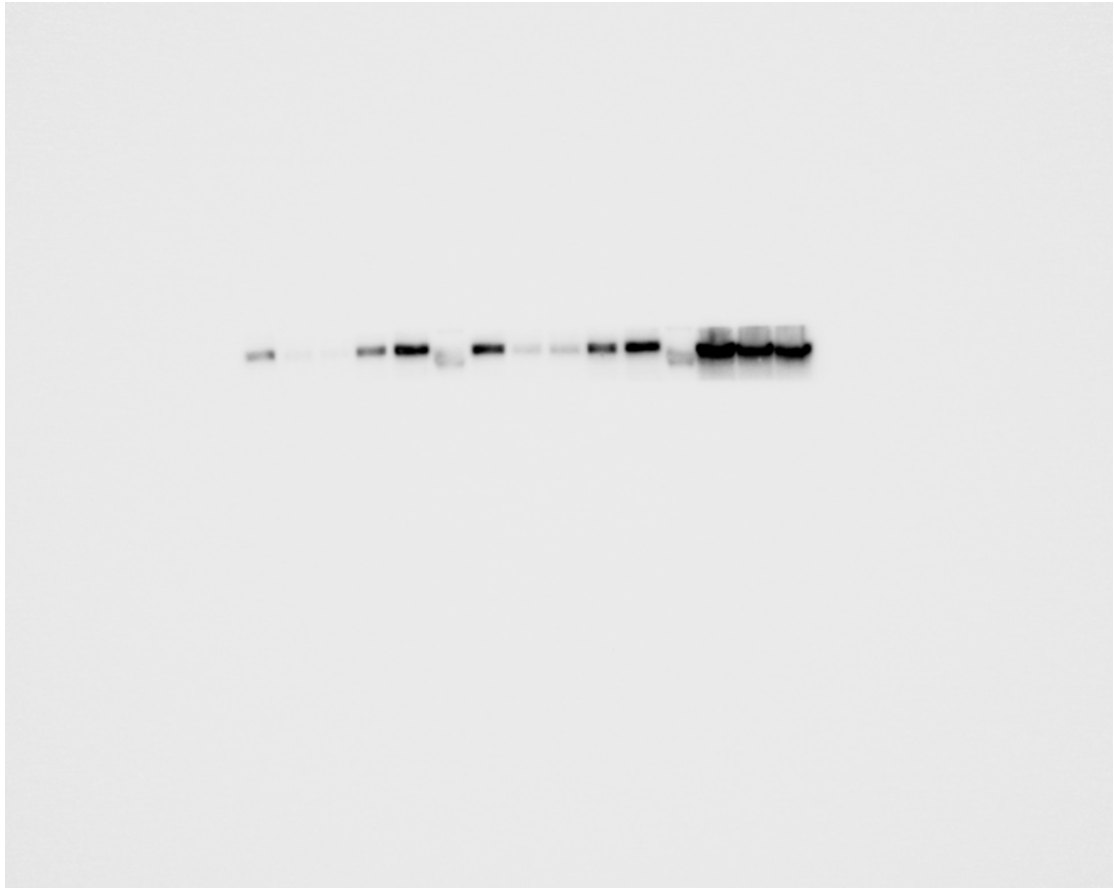

Fig. S2J  
Actin



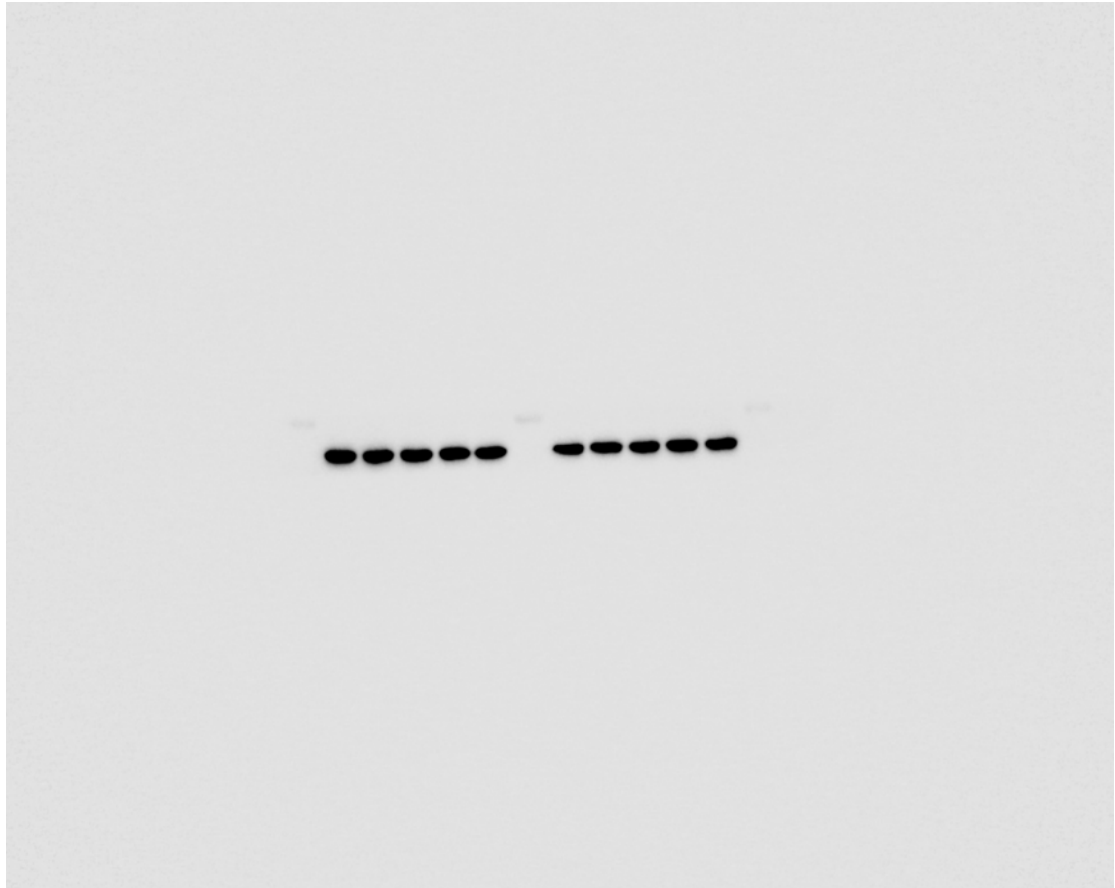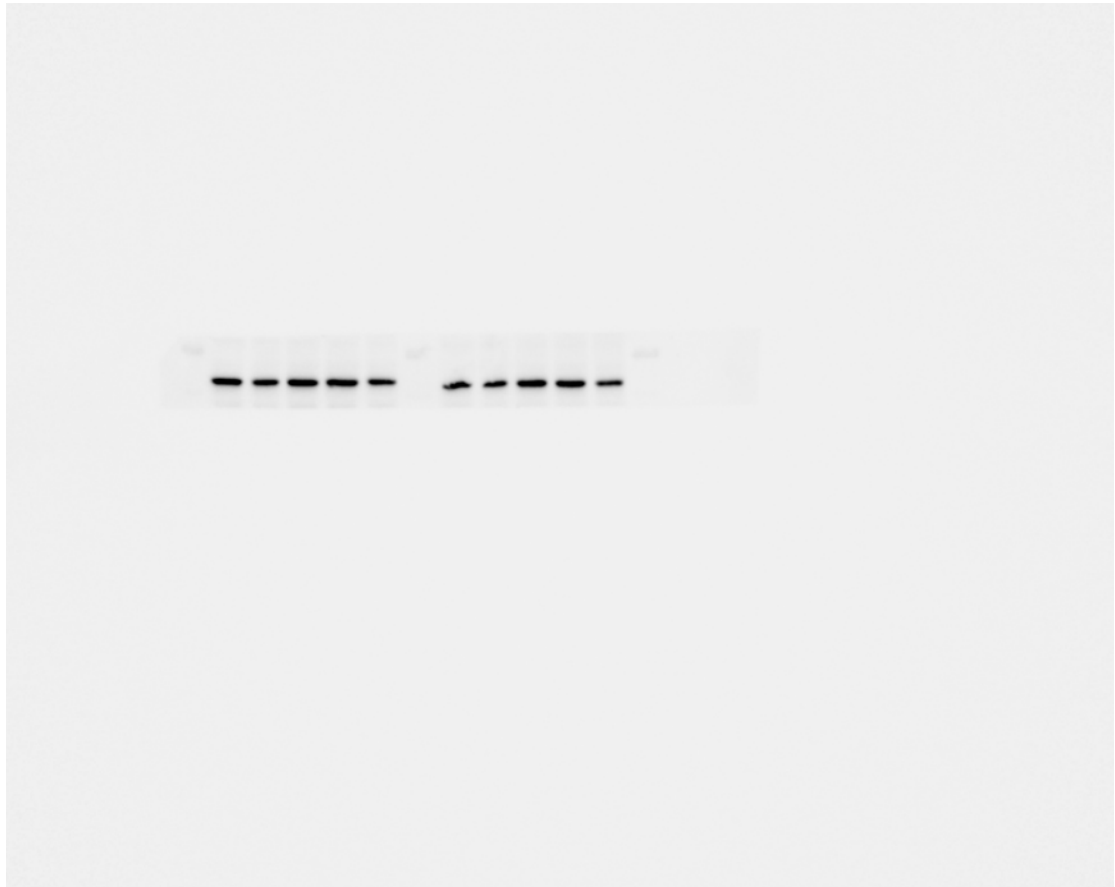

Vimentin

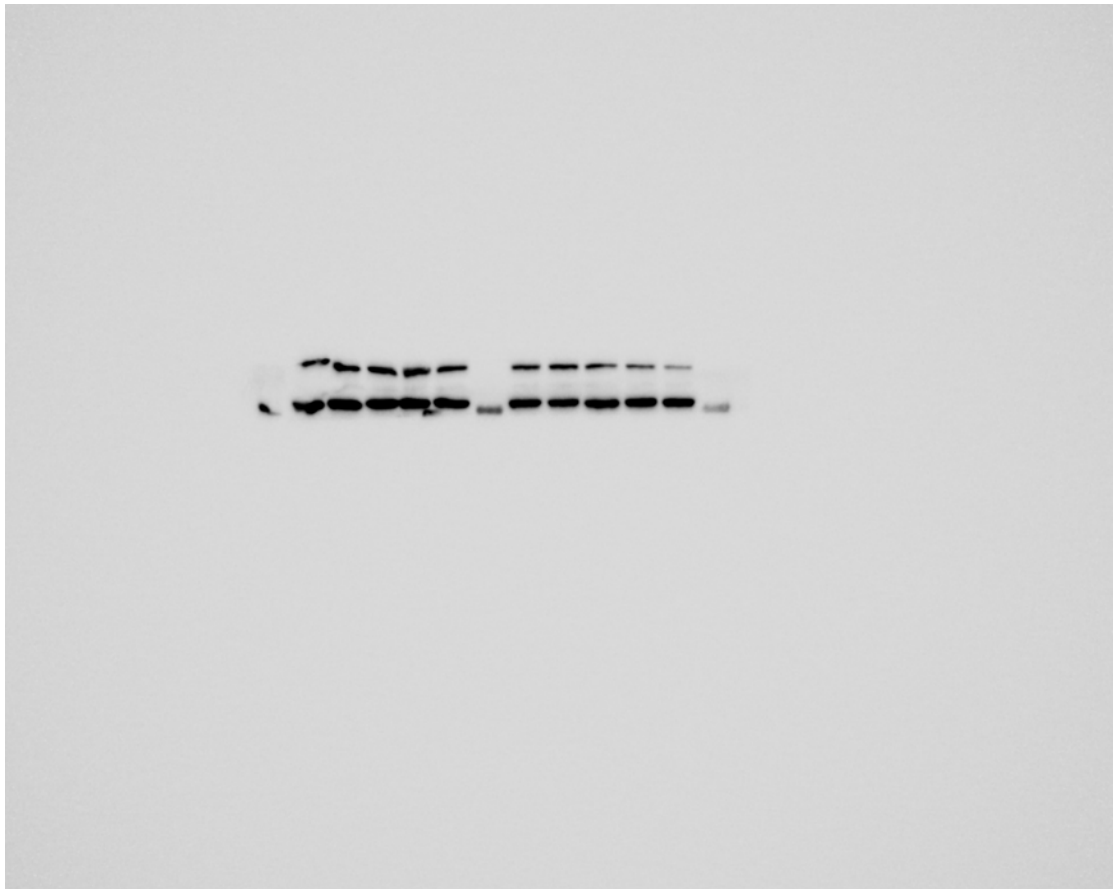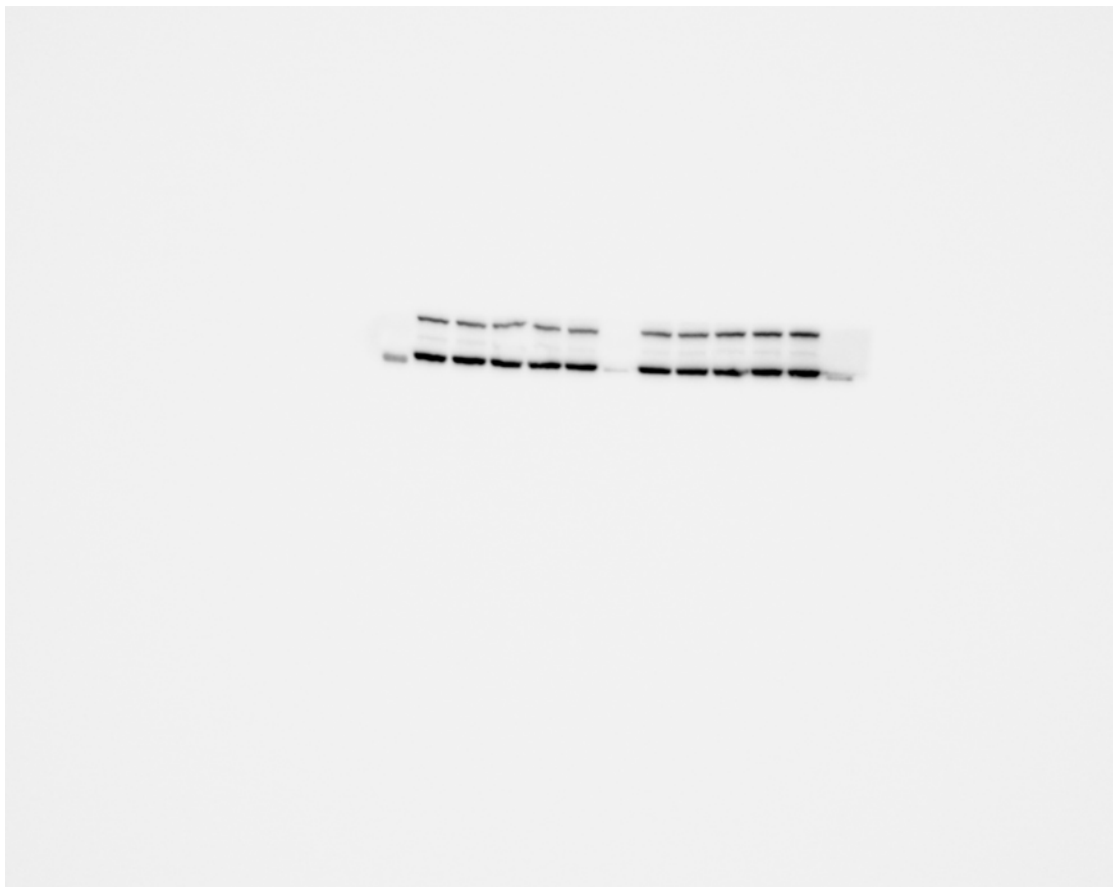

N-cad

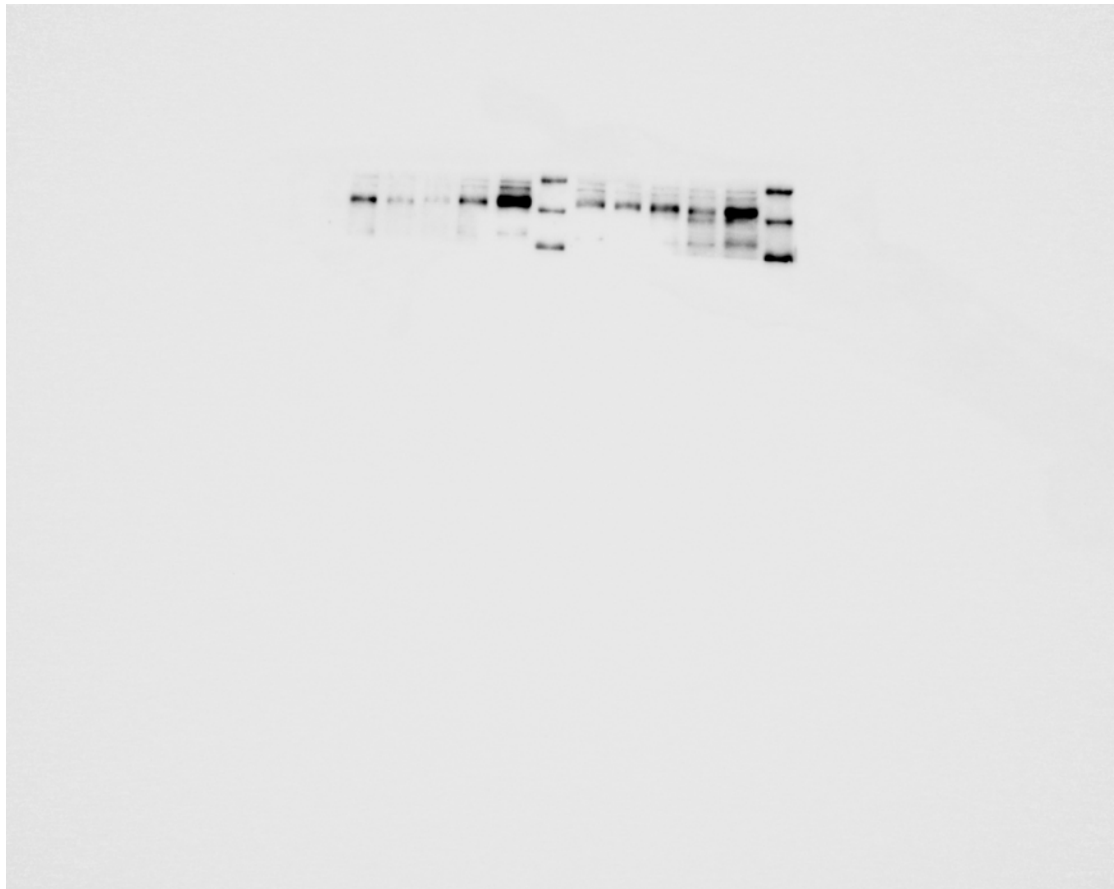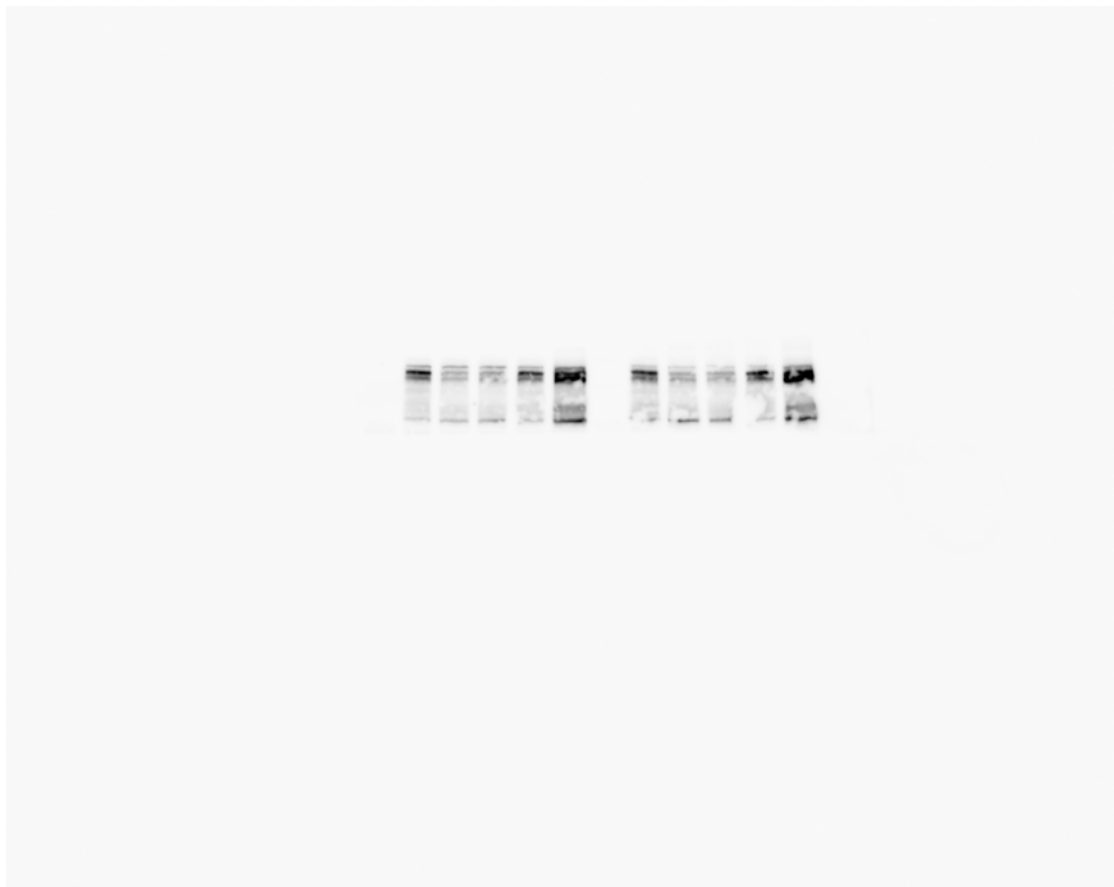

E-cad

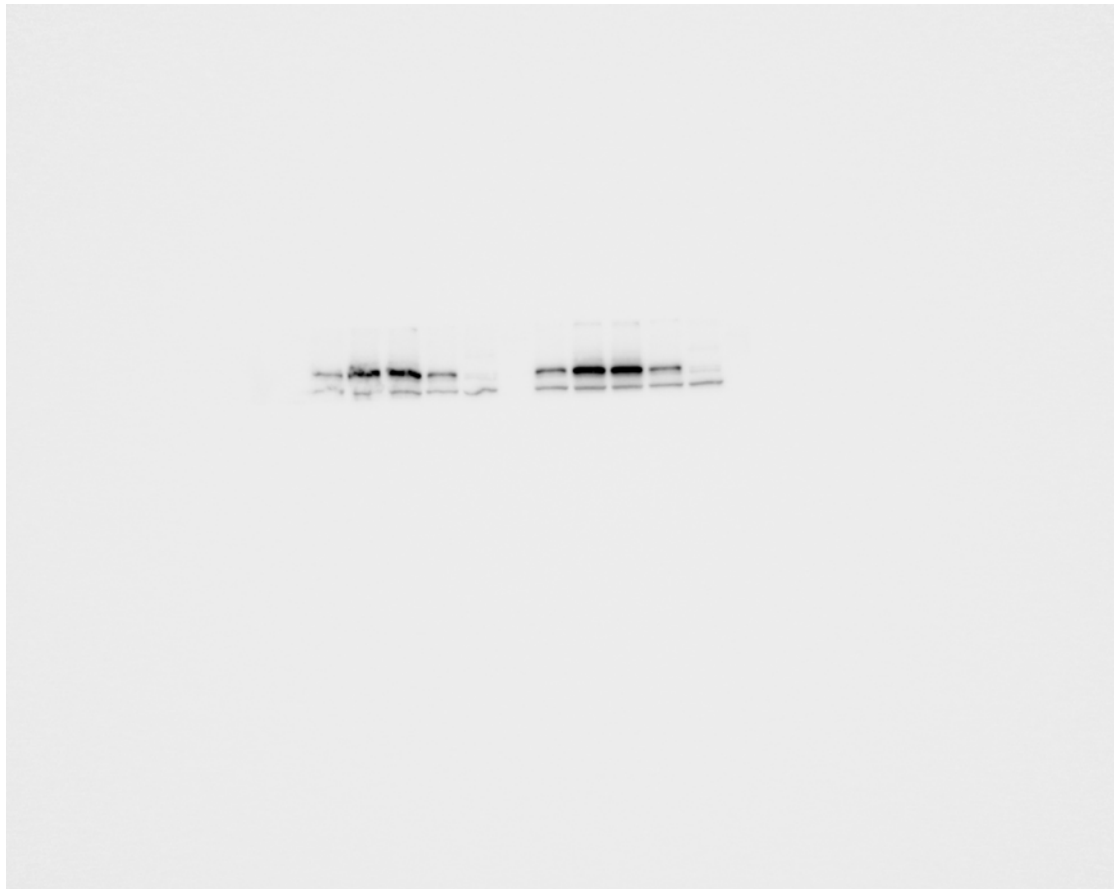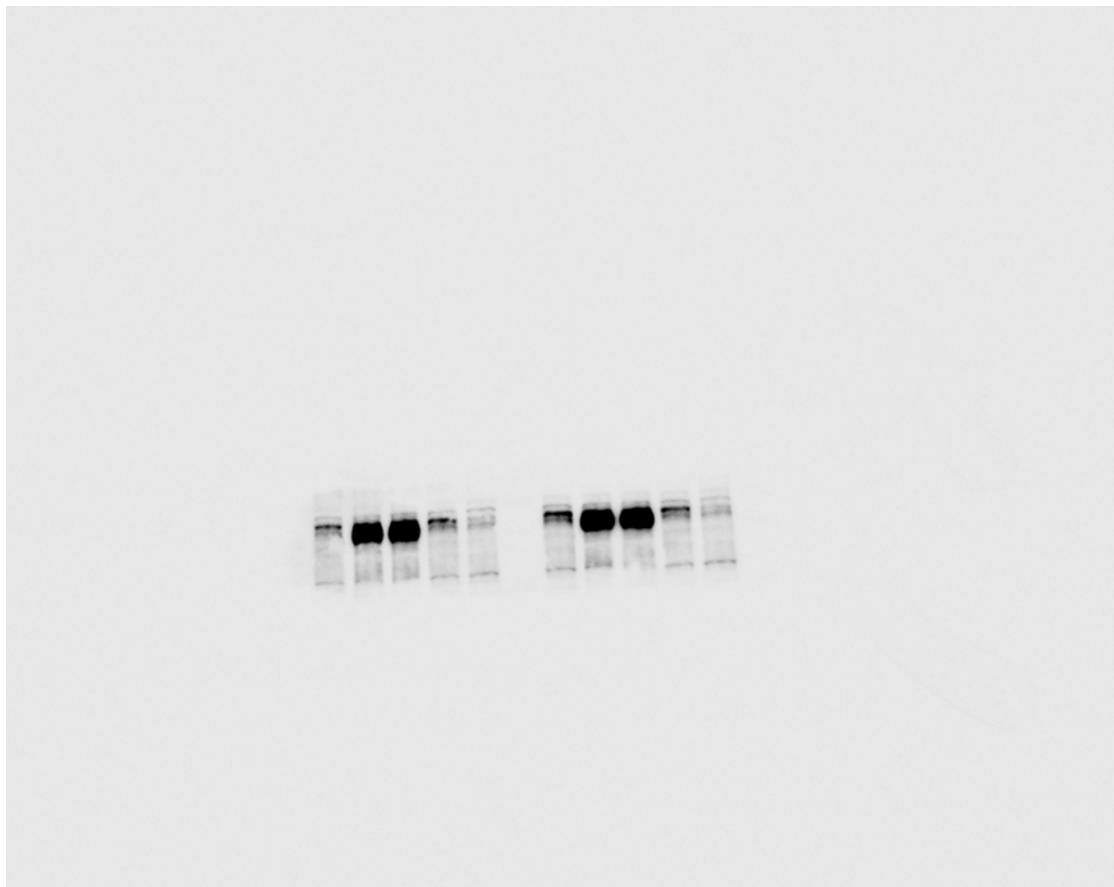

Fig. S4A  
Actin

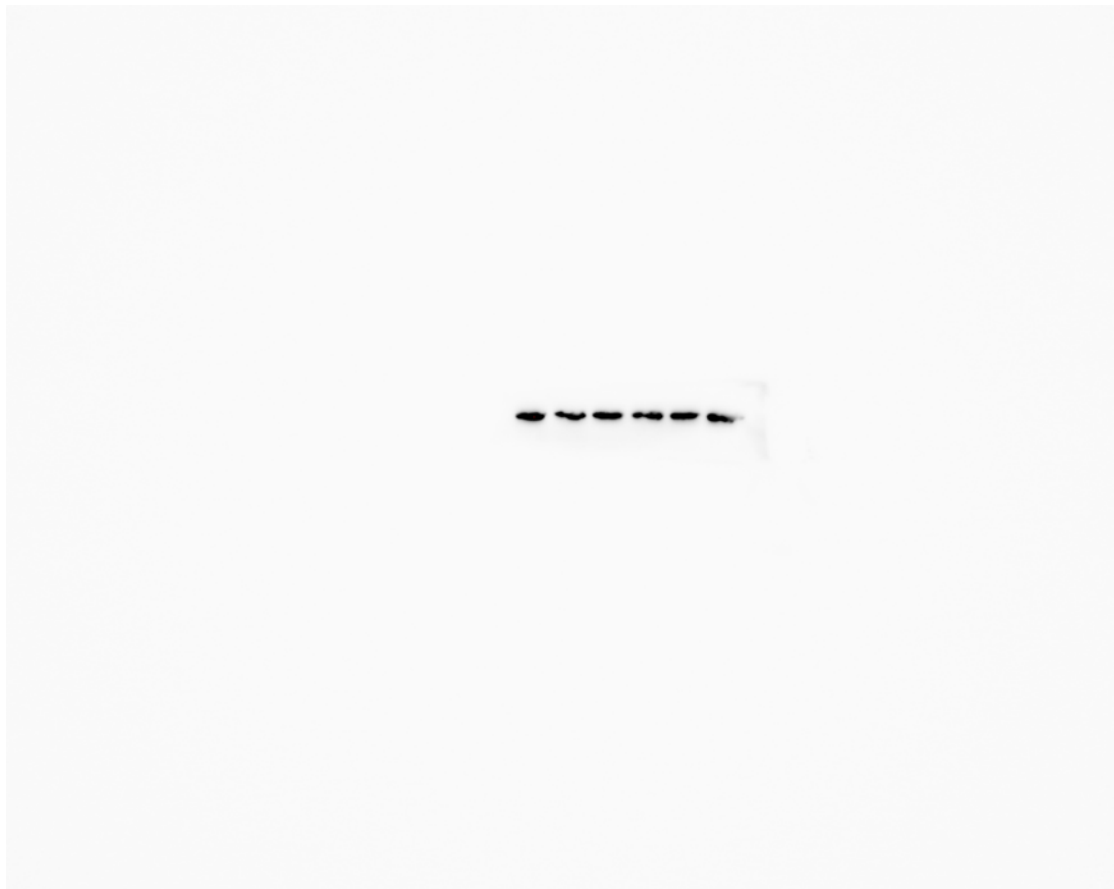

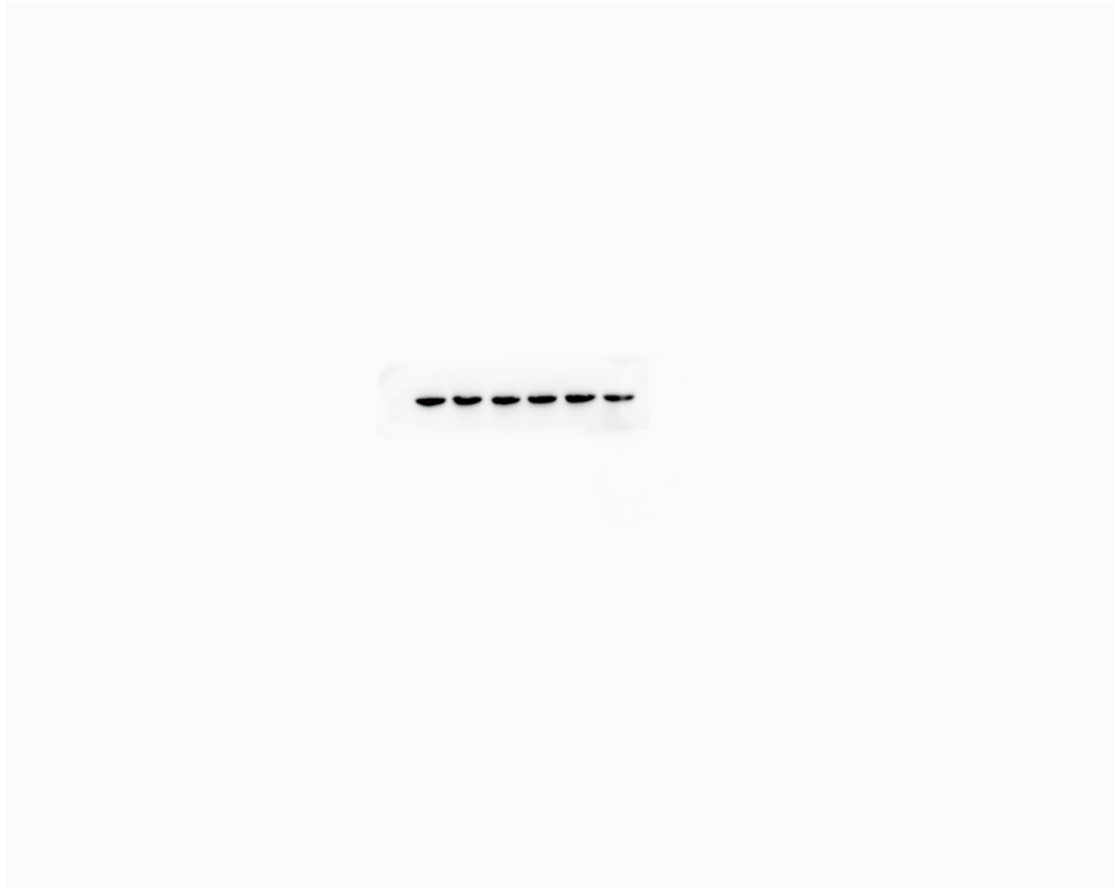

LDHA

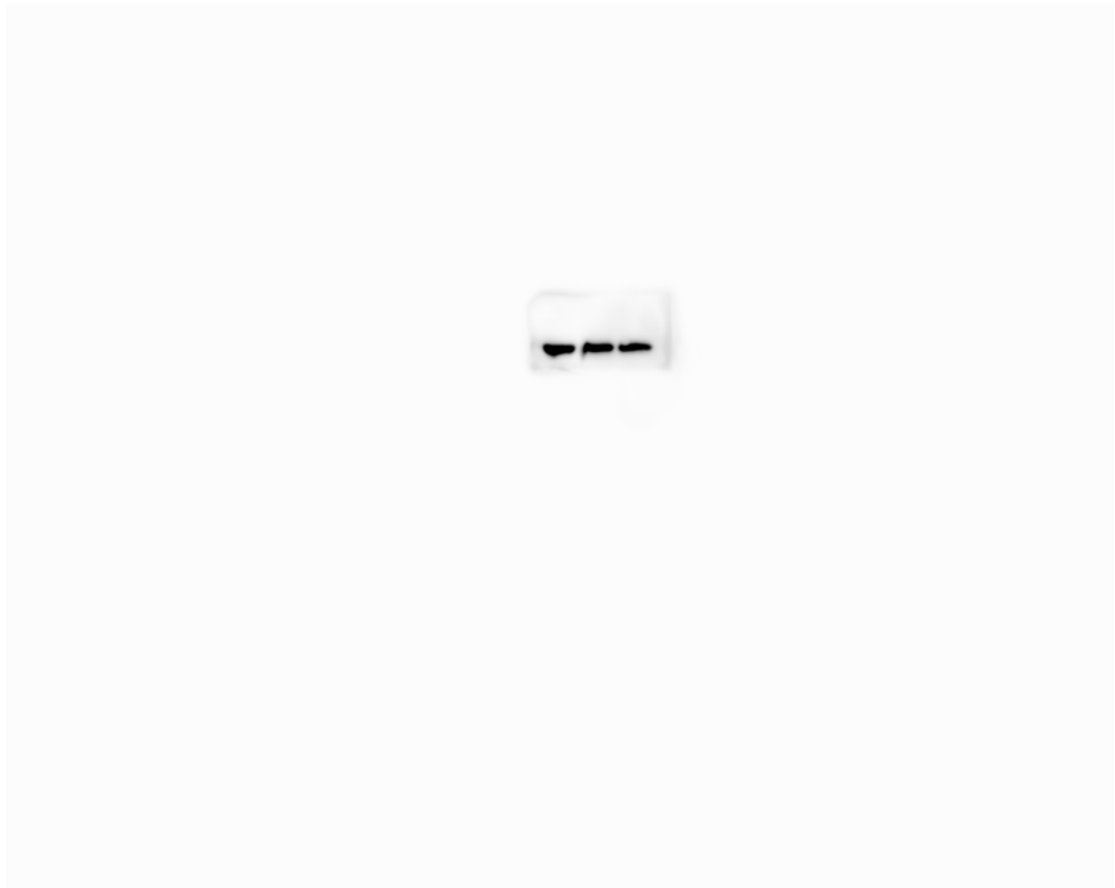

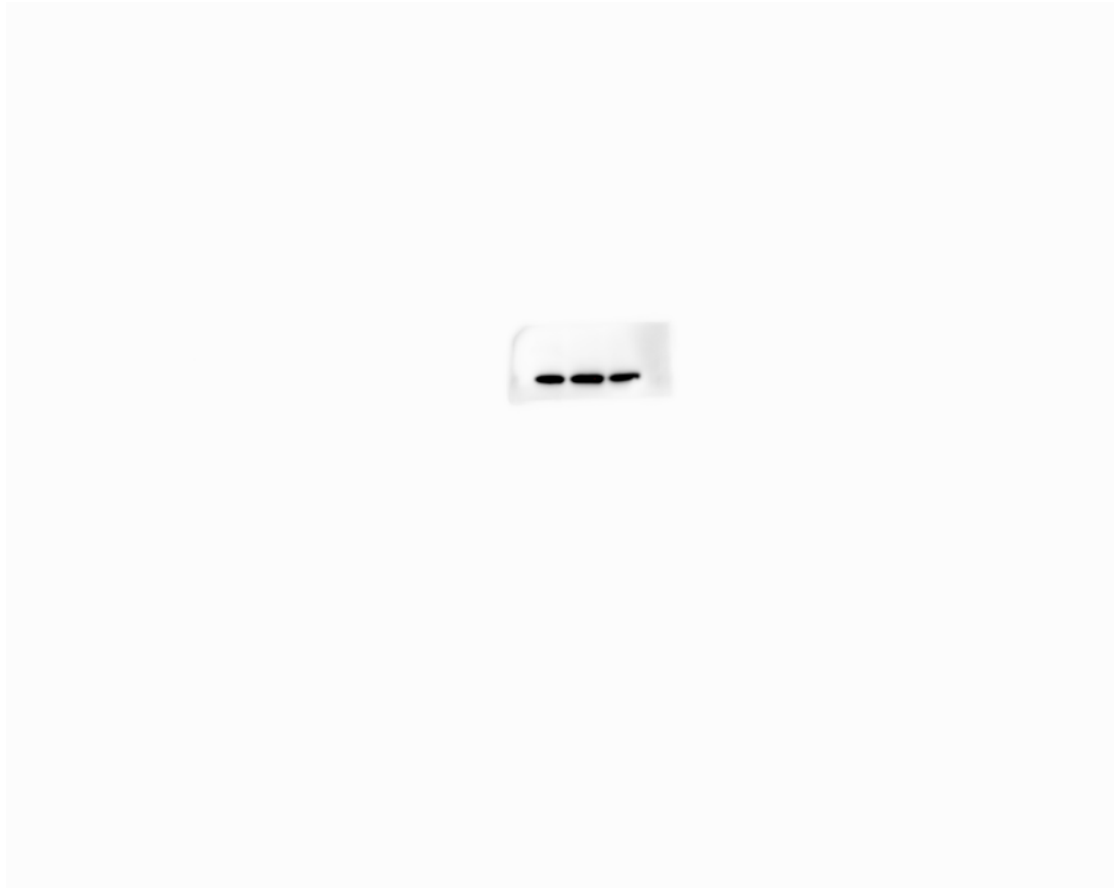

LDHB

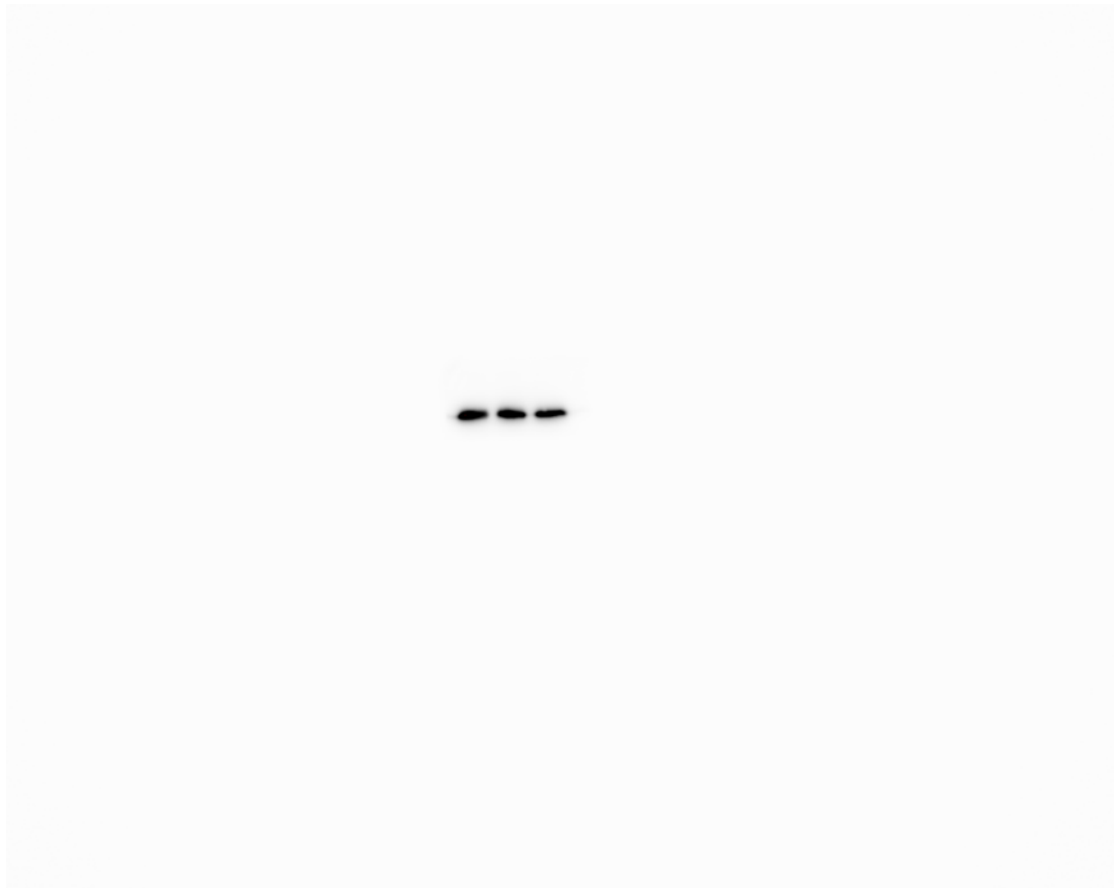

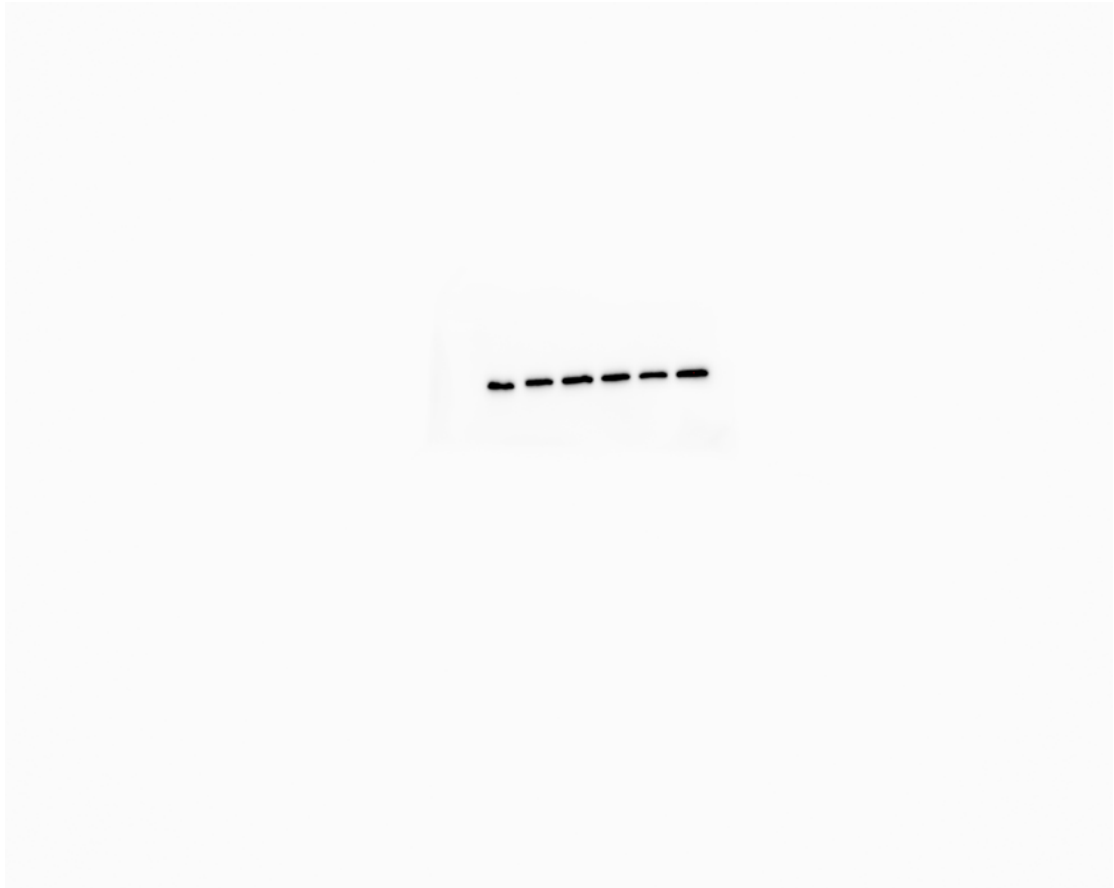

FKBP10

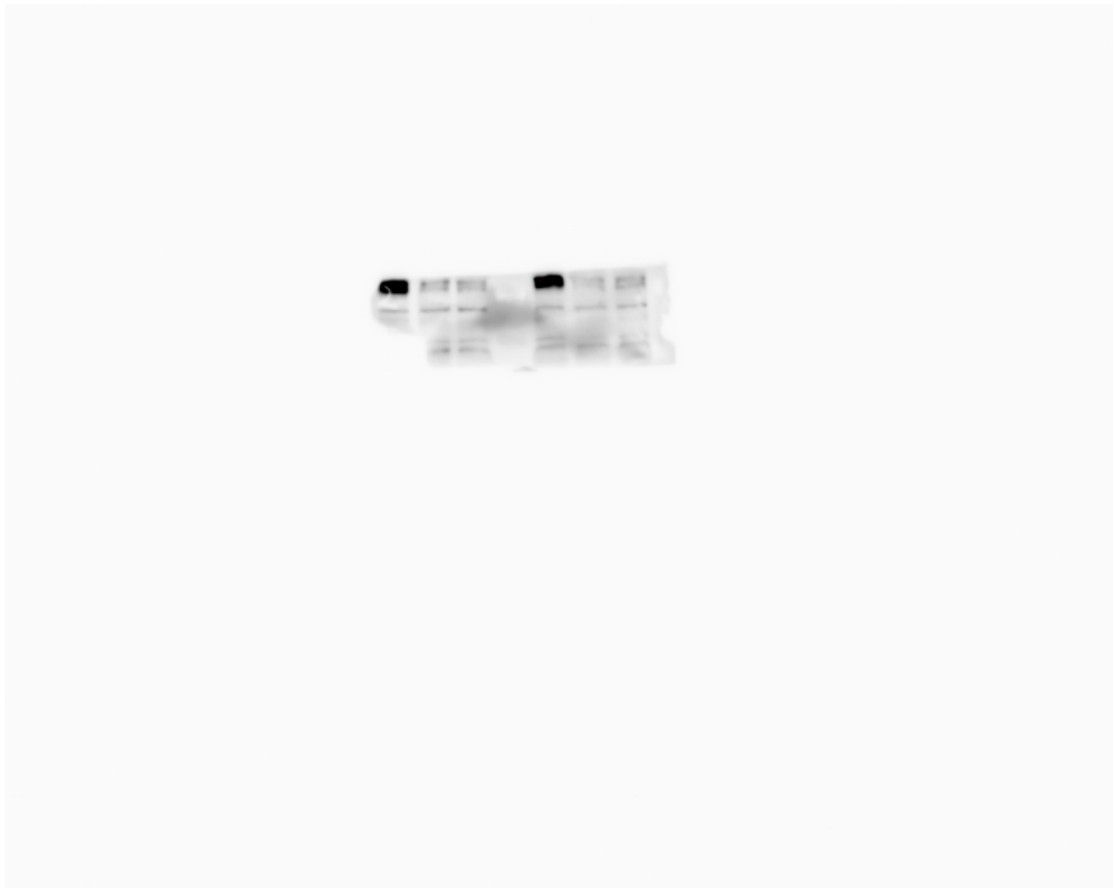



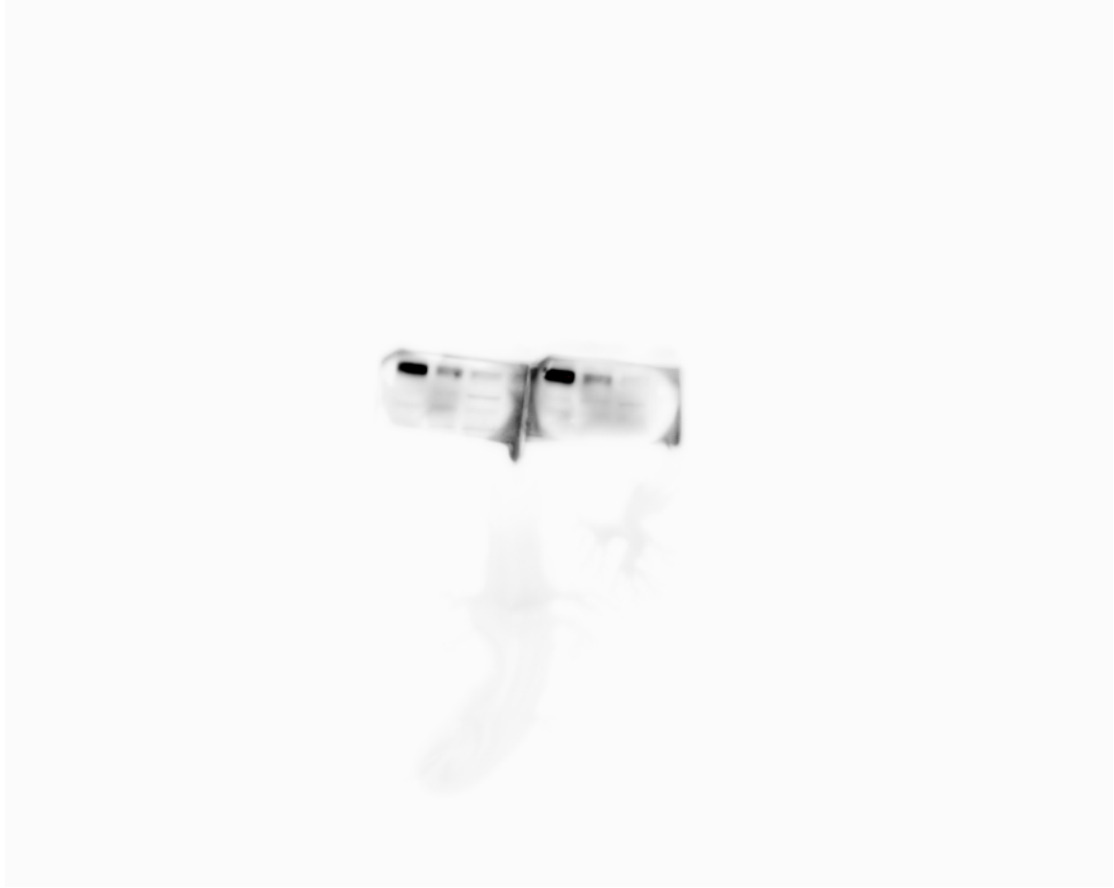

Fig. S5A

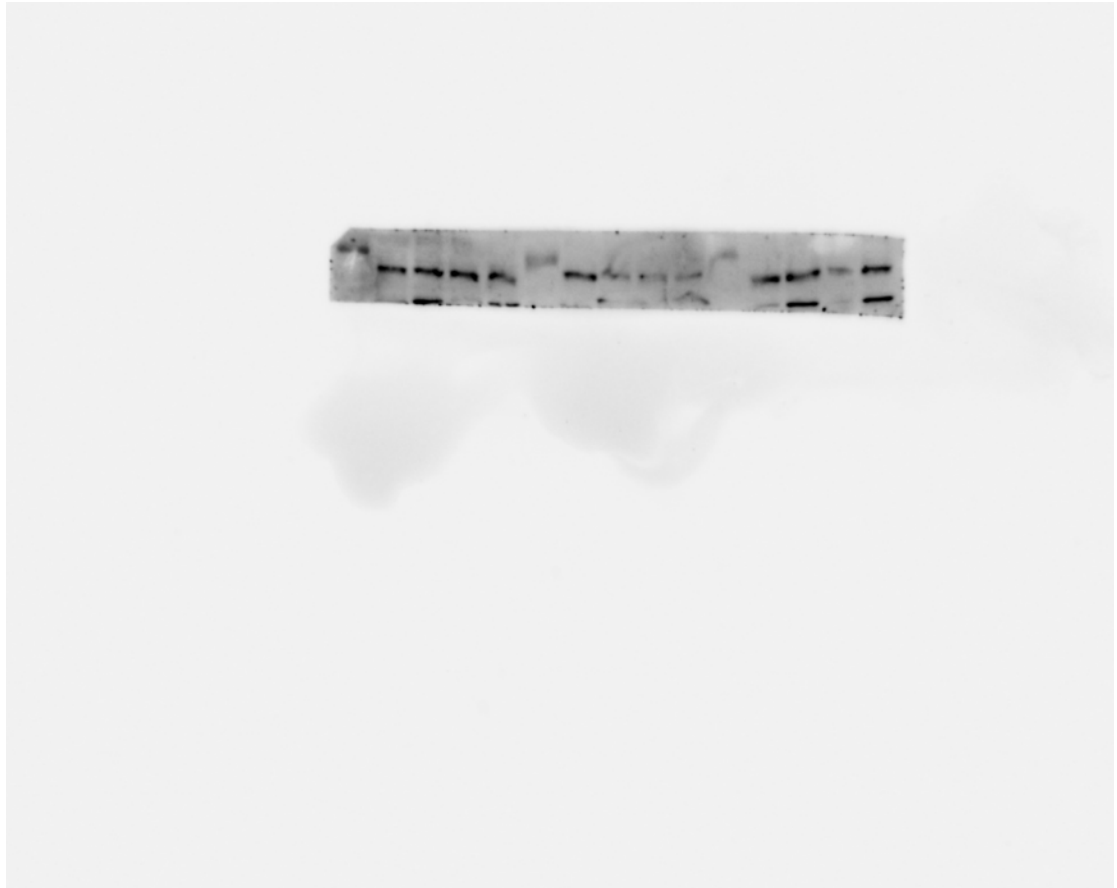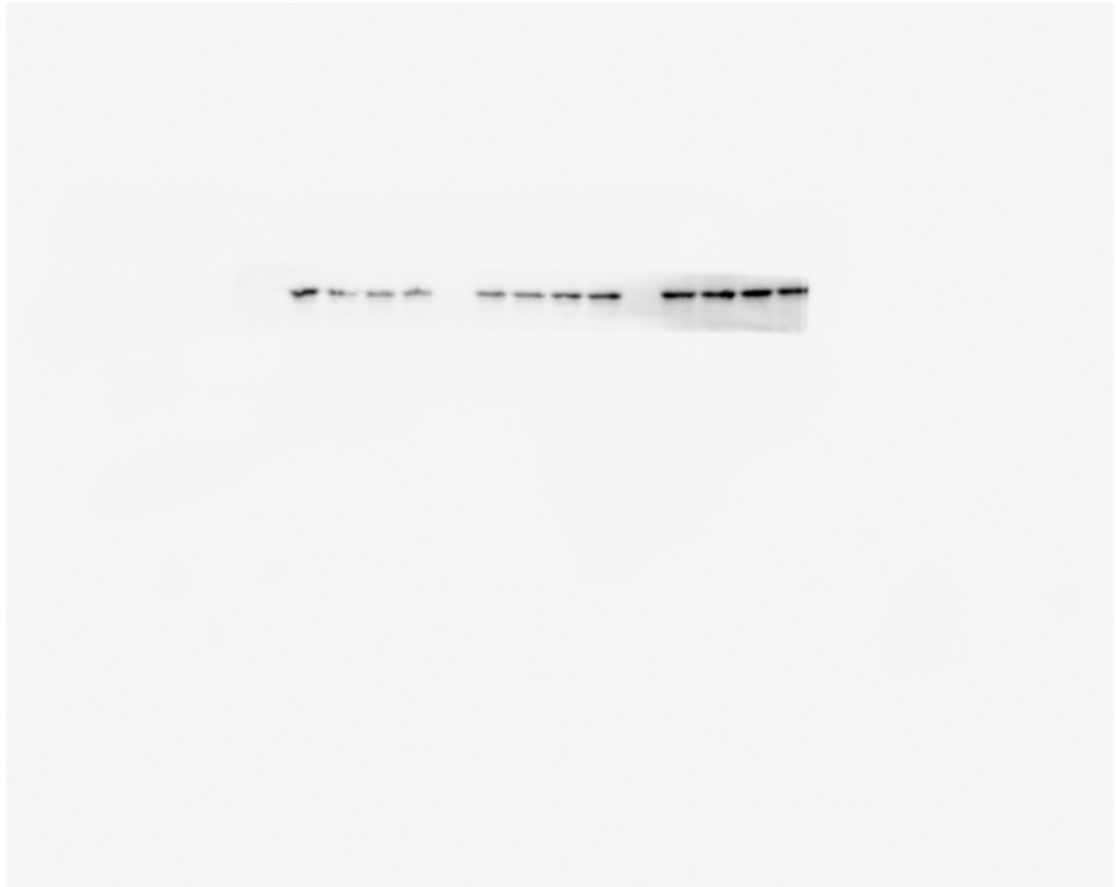

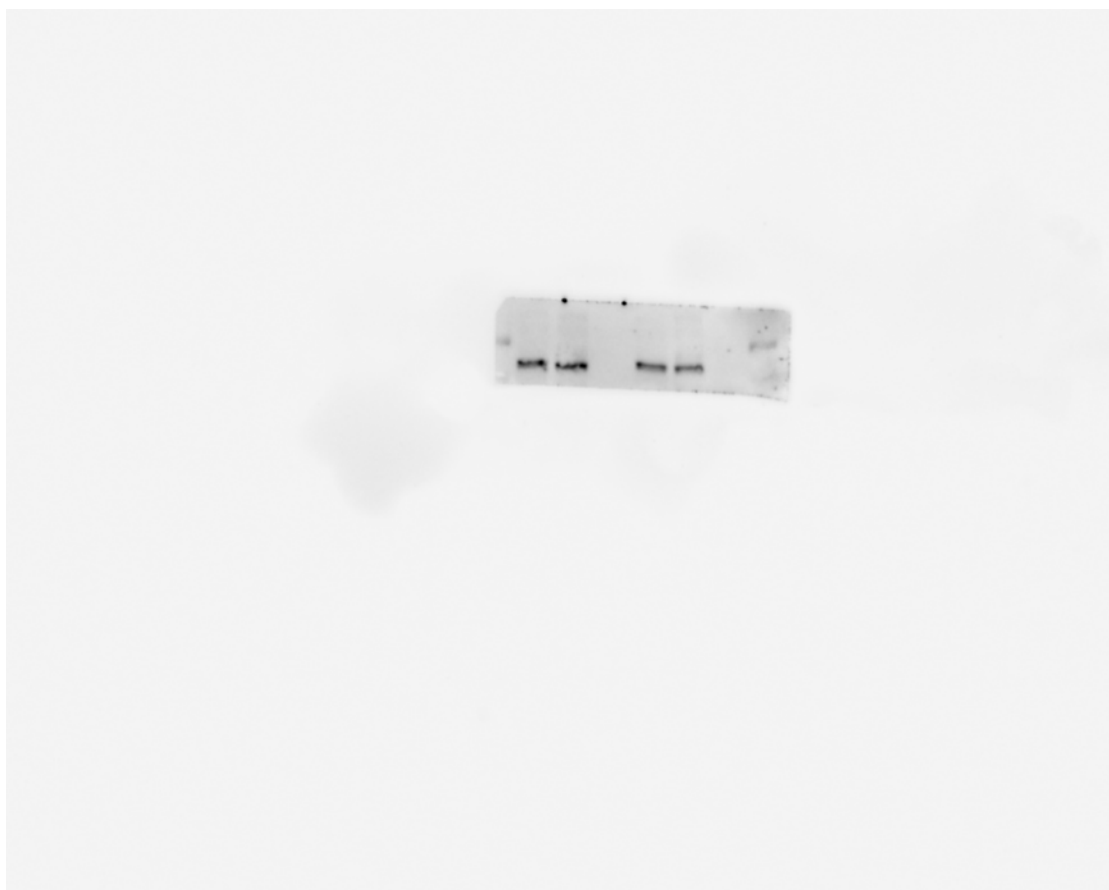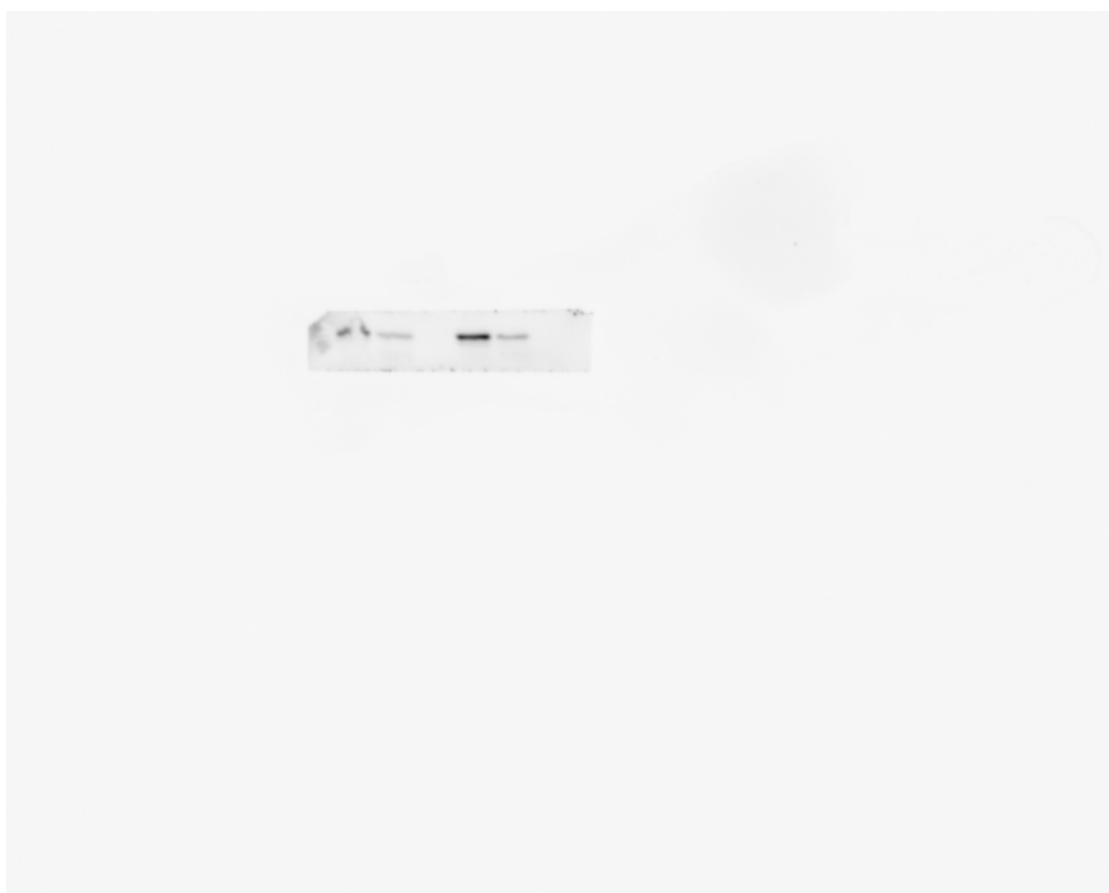

Fig. S6A  
Actin

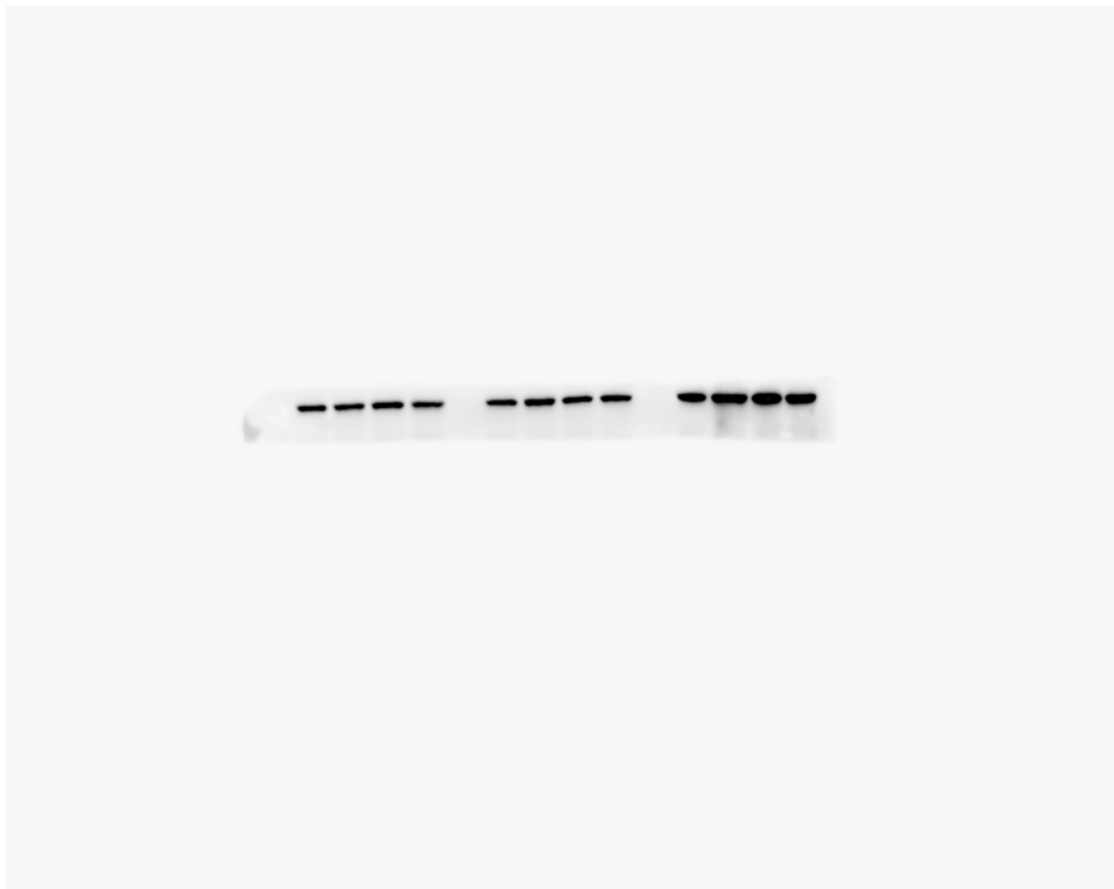

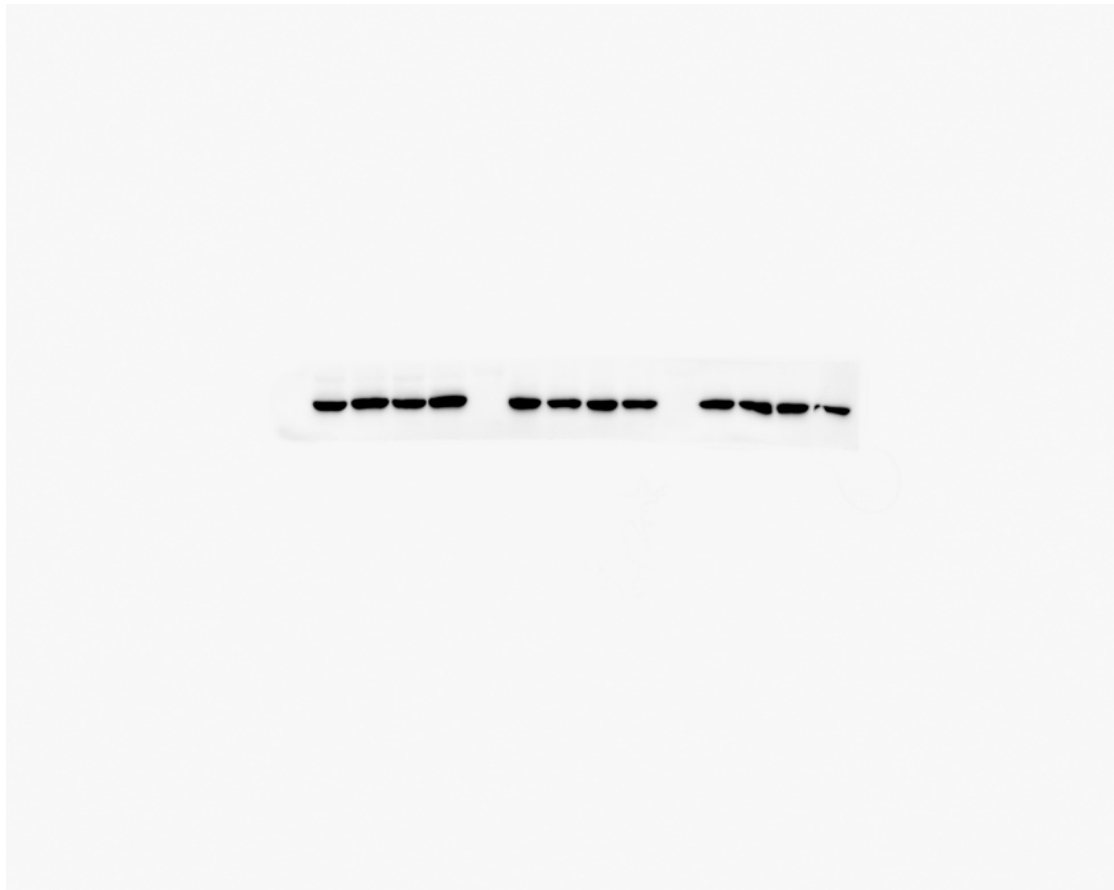

FKBP10

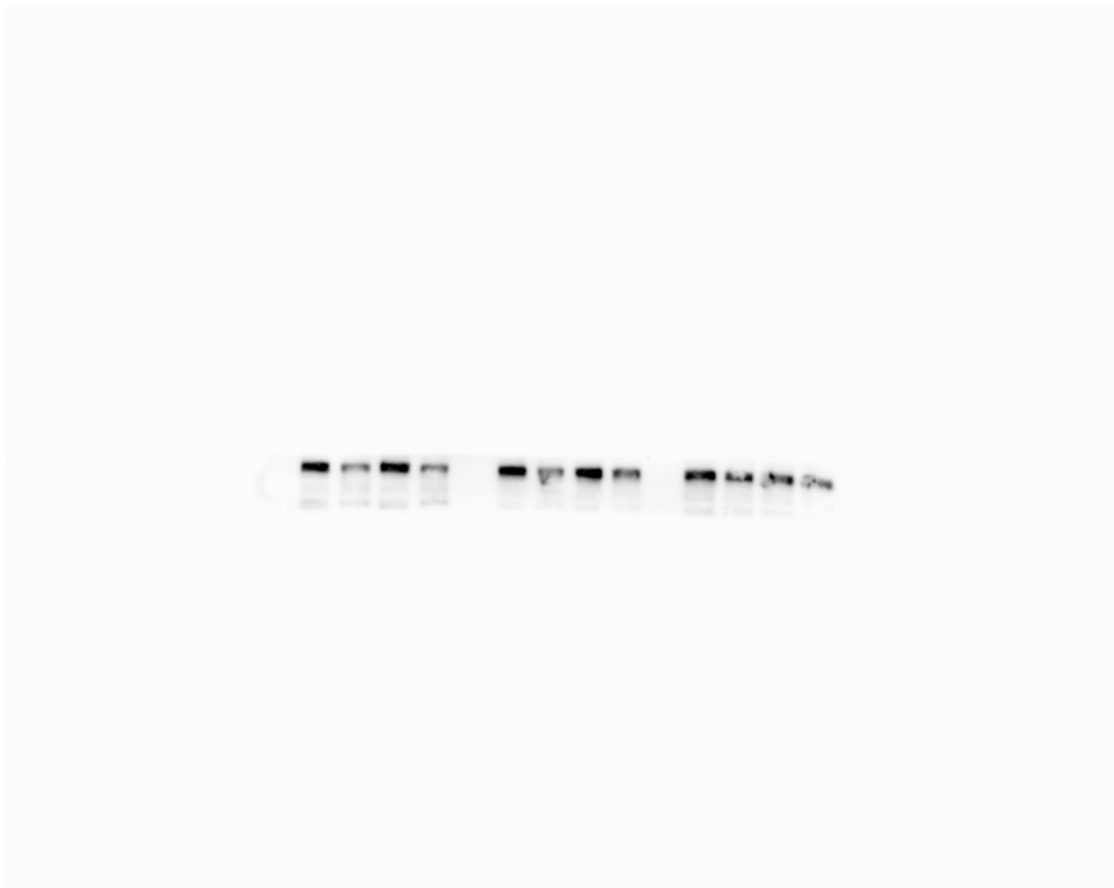

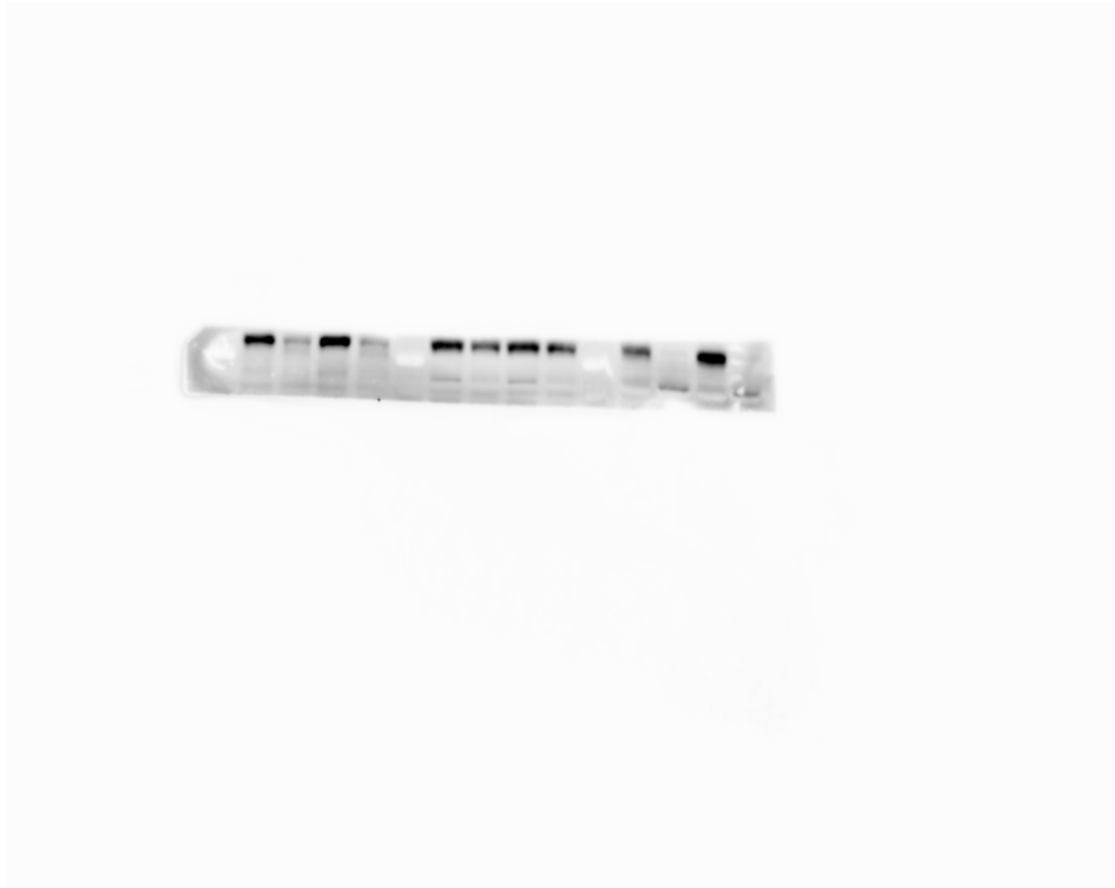

HIF1a



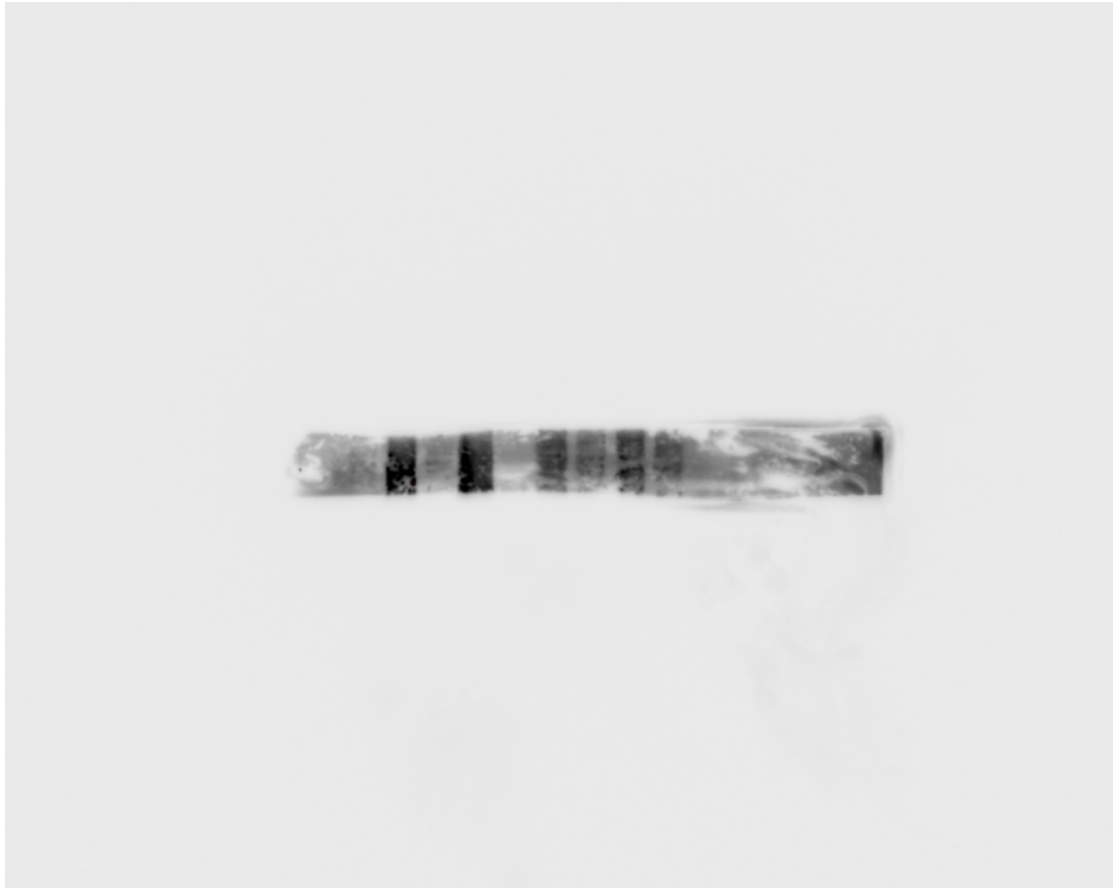

HIF2a

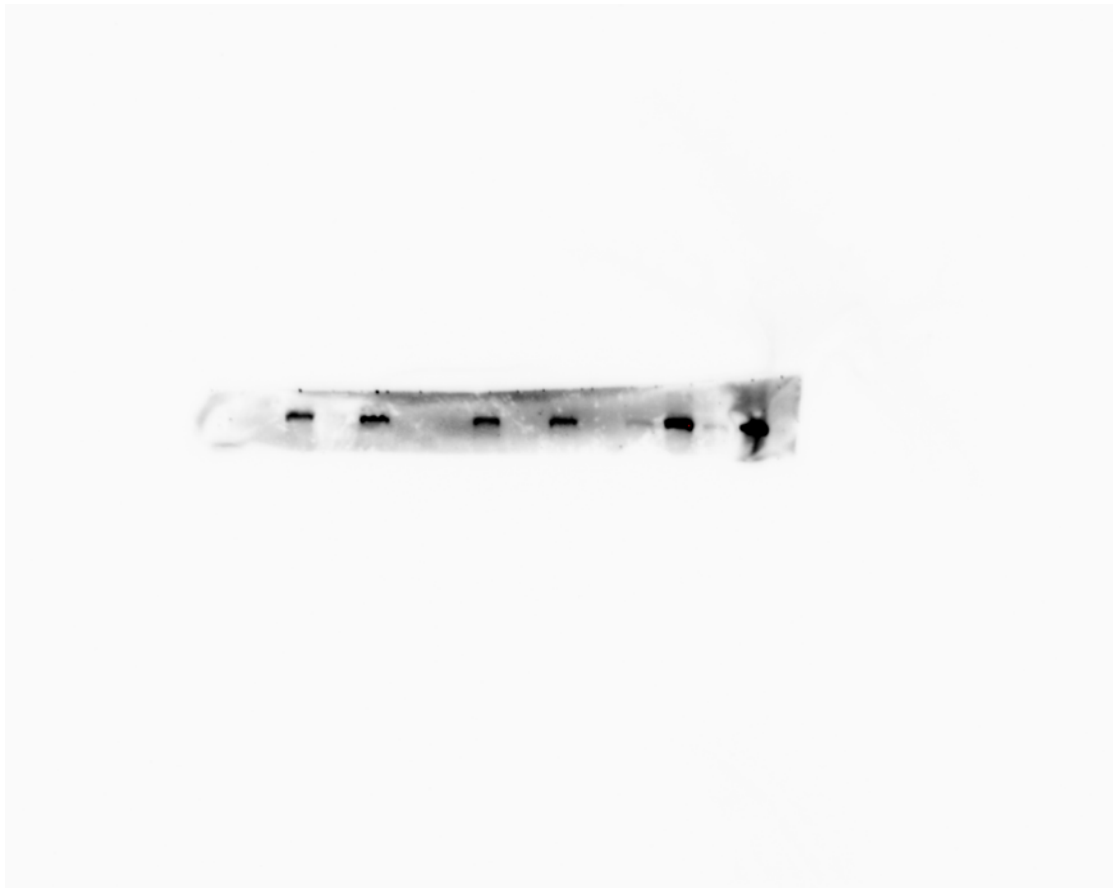

Fig. S7B  
Actin

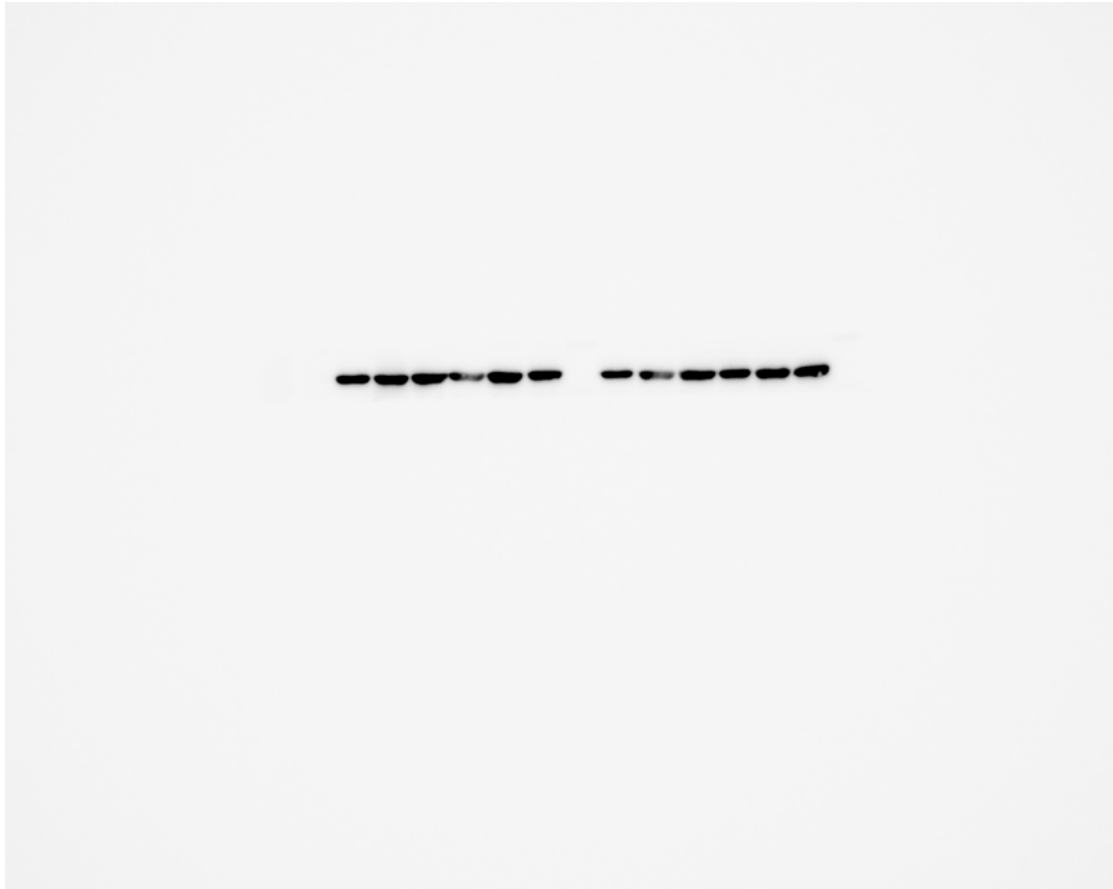

FKBP10



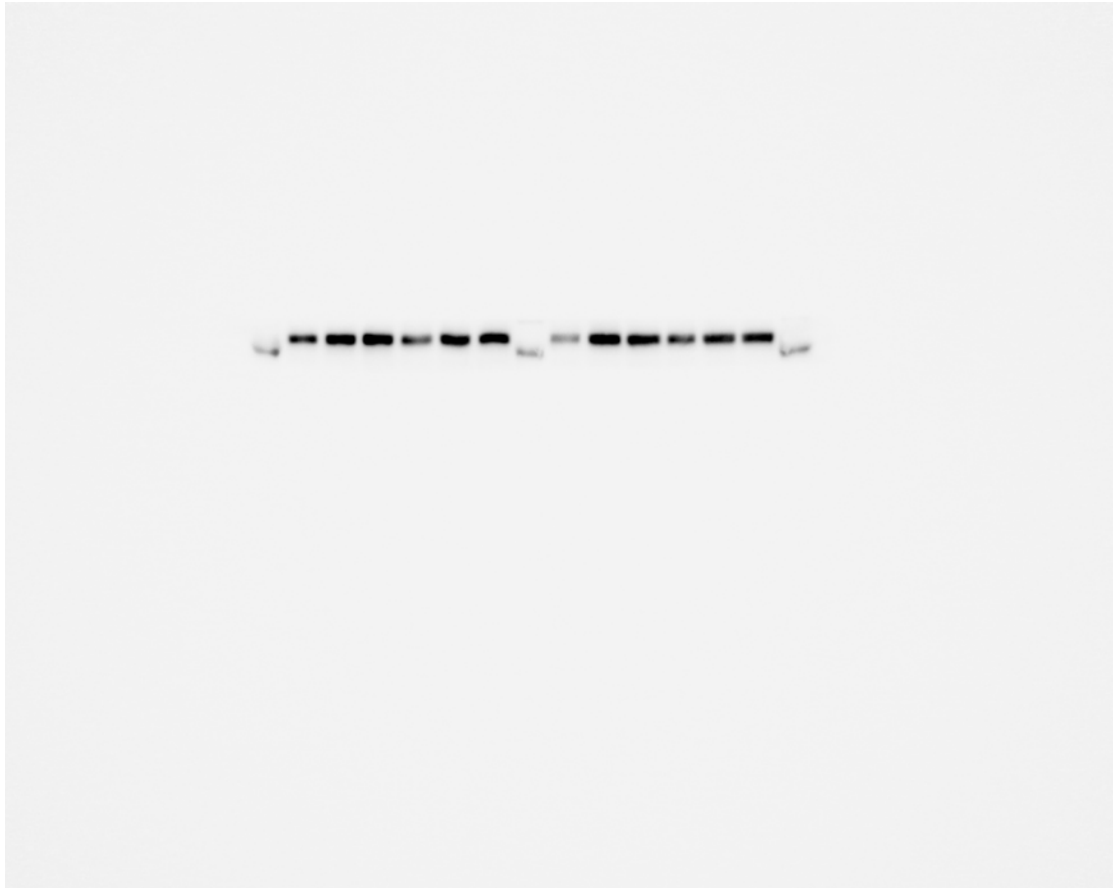

HIF1a

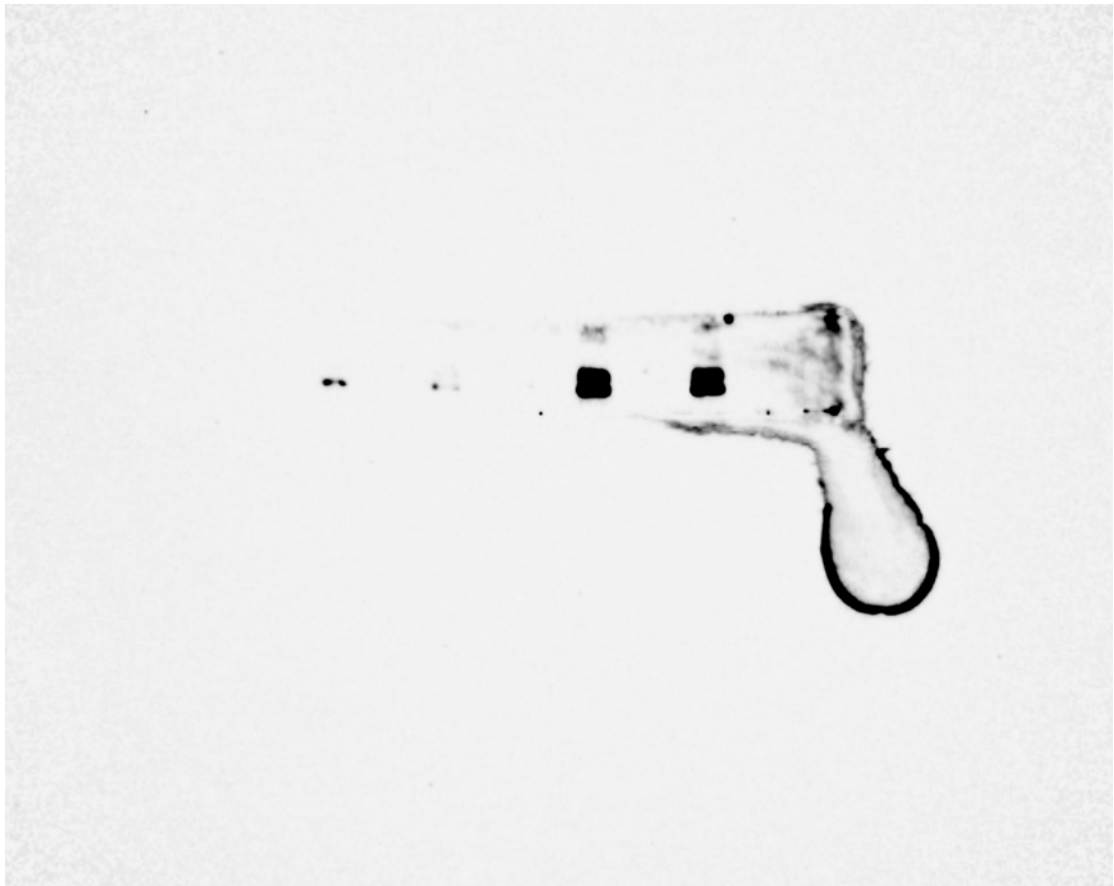

Fig. S7C  
Actin

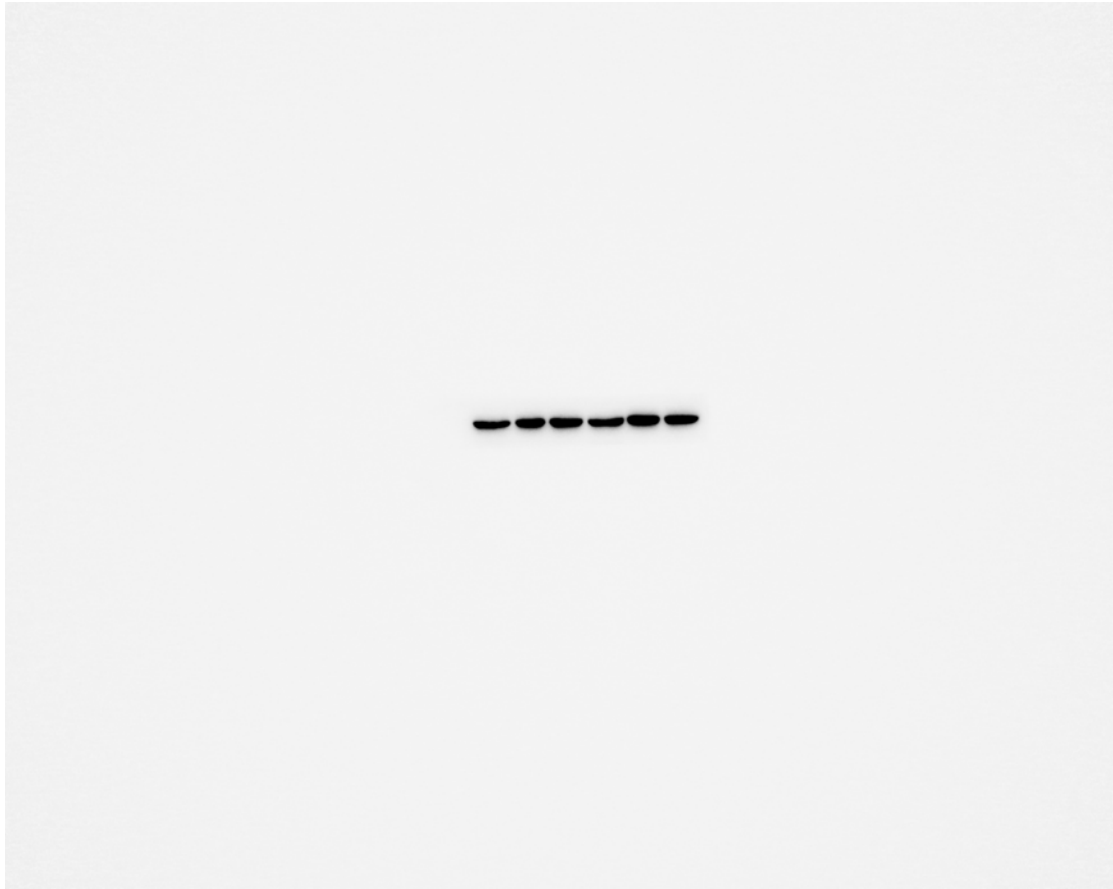

FKBP10

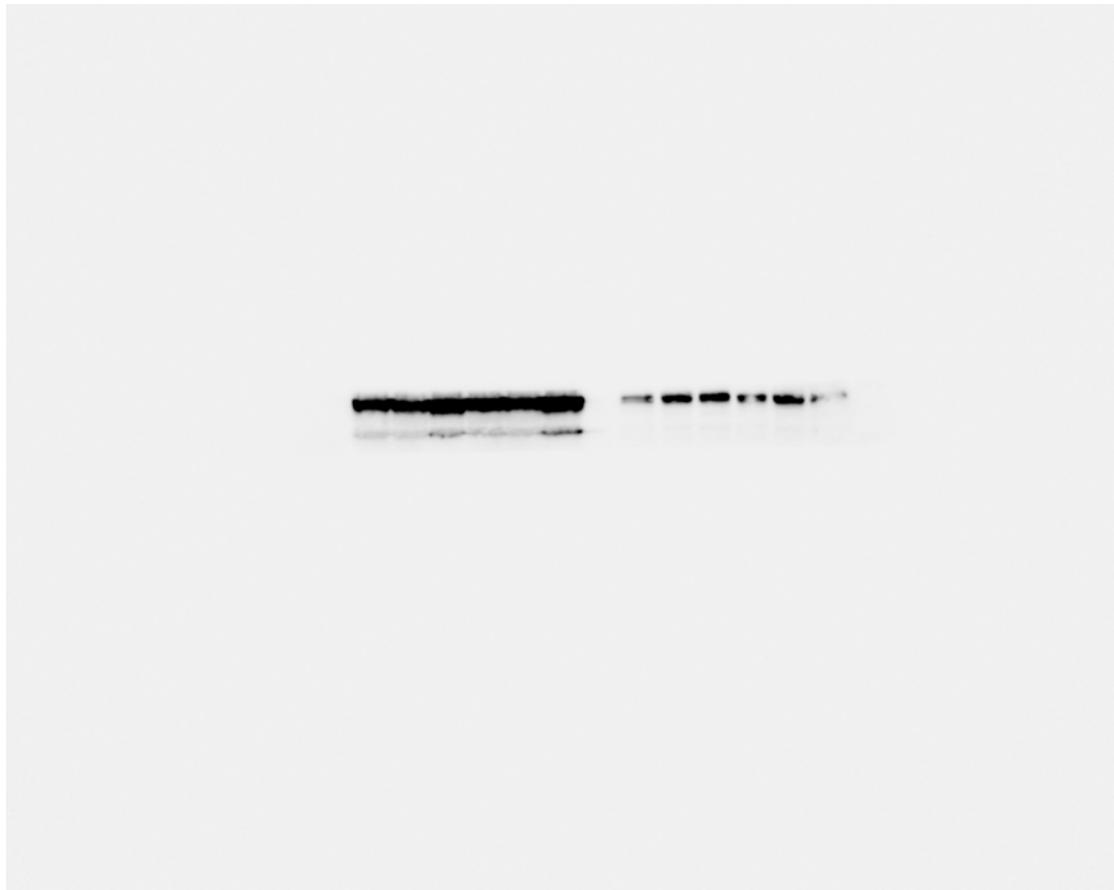

HIF1a

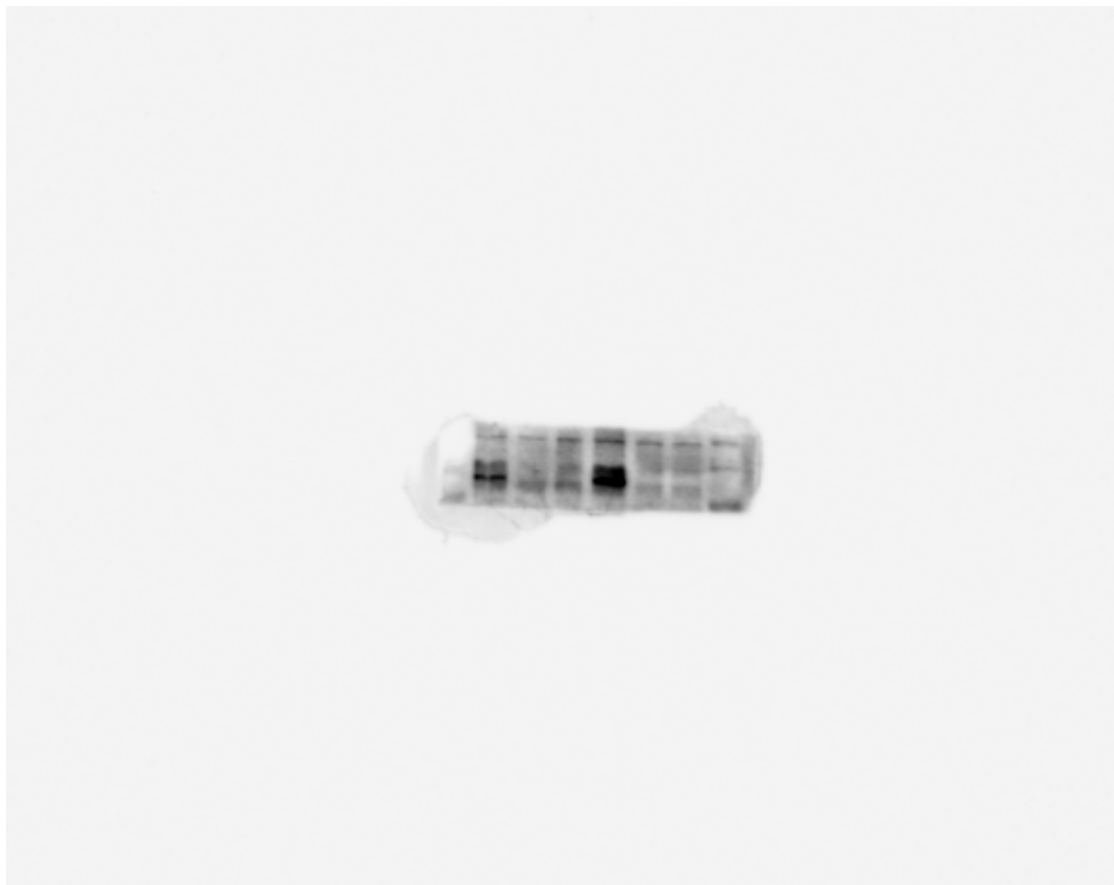

Fig. S7D  
Actin

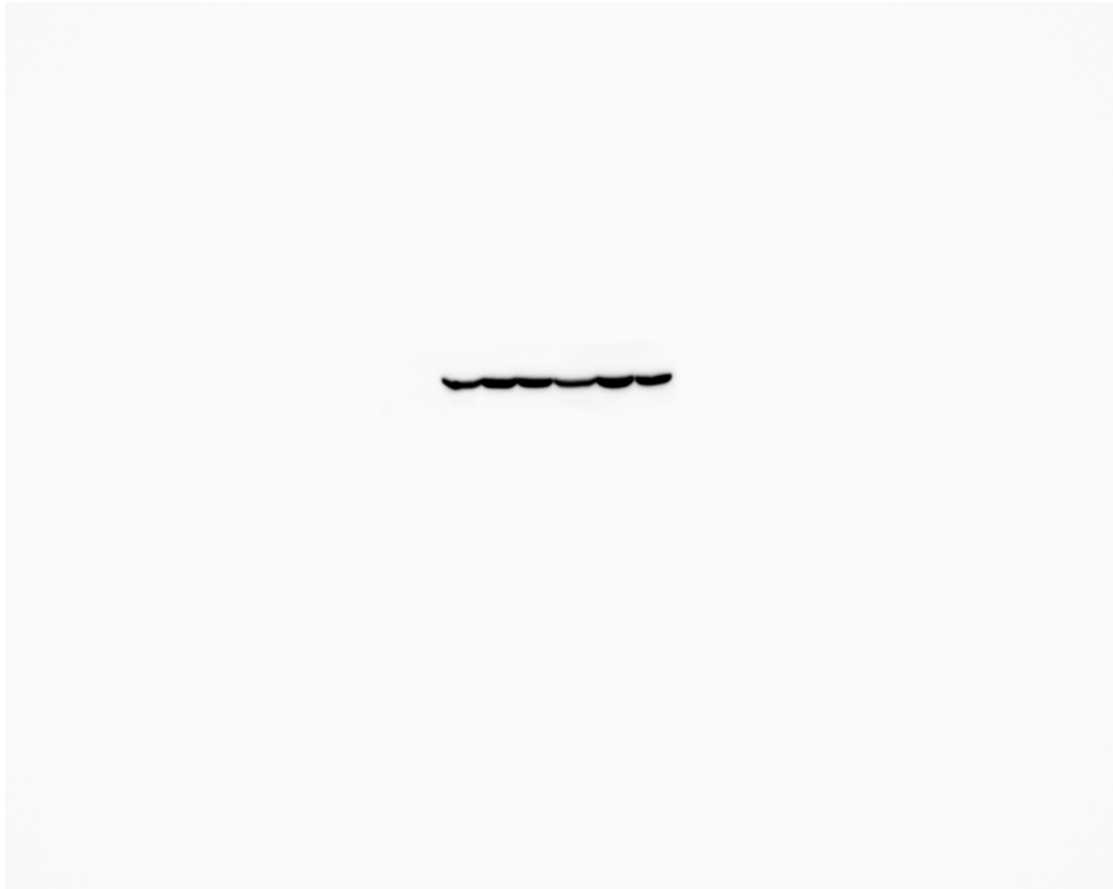

FKBP10  
HIF2a

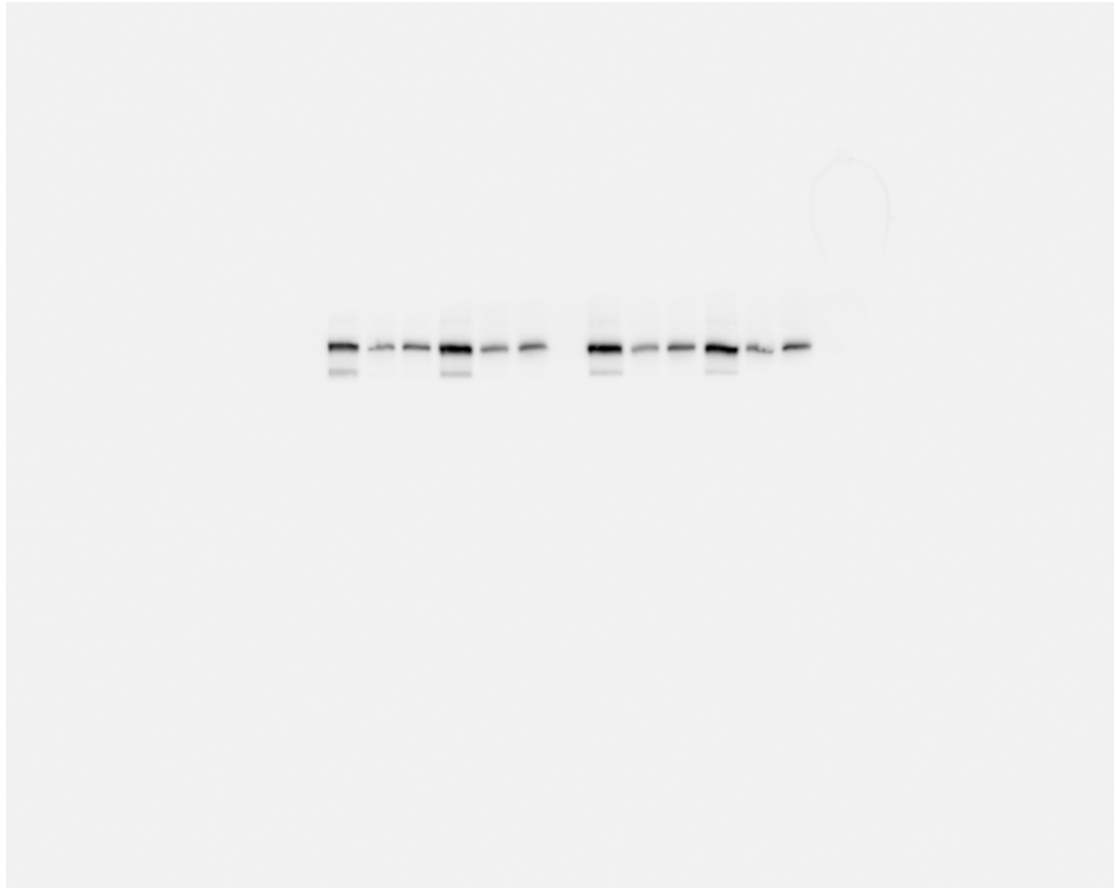

Fig. S7E  
Actin

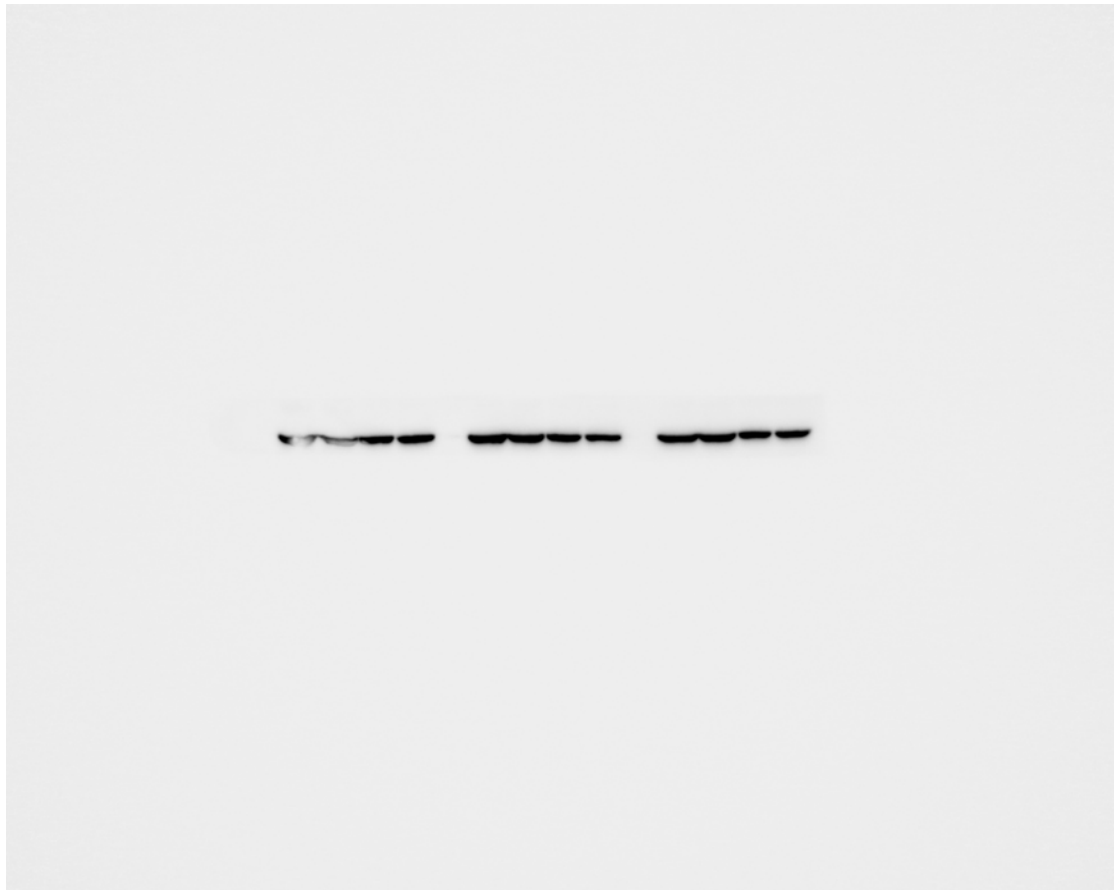

FKBP10

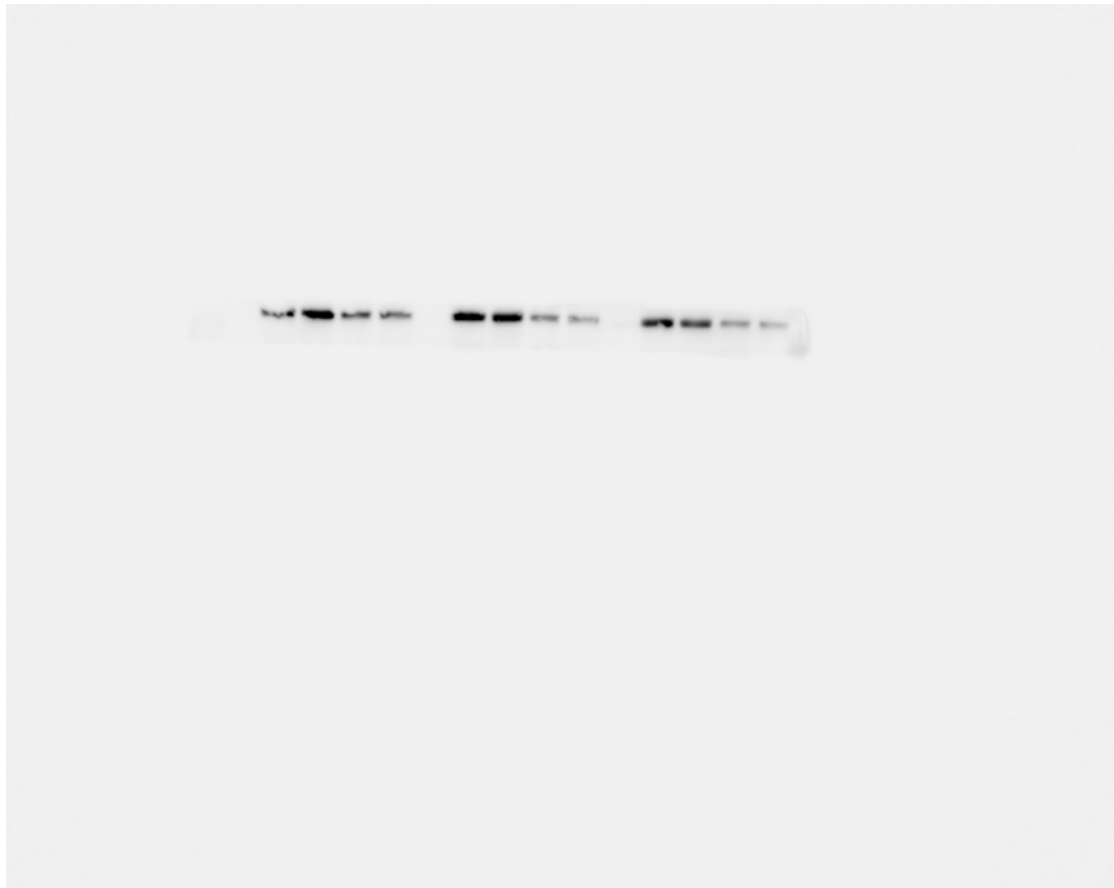

HIF1a

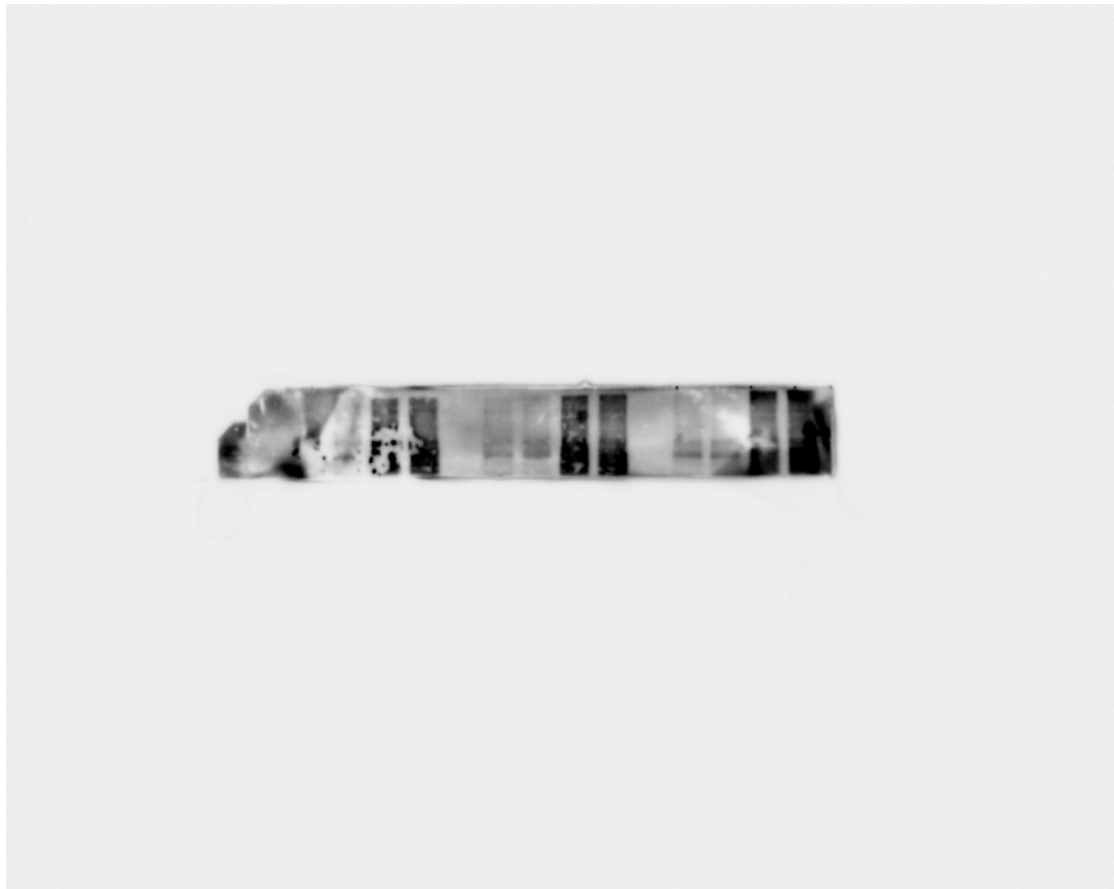

Supplement: 41419_2024_6450_MOESM3_ESM.pdf [file 41419_2024_6450_MOESM3_ESM.pdf]
