# Supplementary material for: FKBP10 promotes clear cell renal cell carcinoma progression and regulates sensitivity to the HIF2α blockade by facilitating LDHA phosphorylation
Source: PubMed Central journal article supplement (PMC10794466; doi:10.1038/s41419-024-06450-x), 2024-01-17
Supplement: 41419_2024_6450_MOESM2_ESM.pdf [file 41419_2024_6450_MOESM2_ESM.pdf]

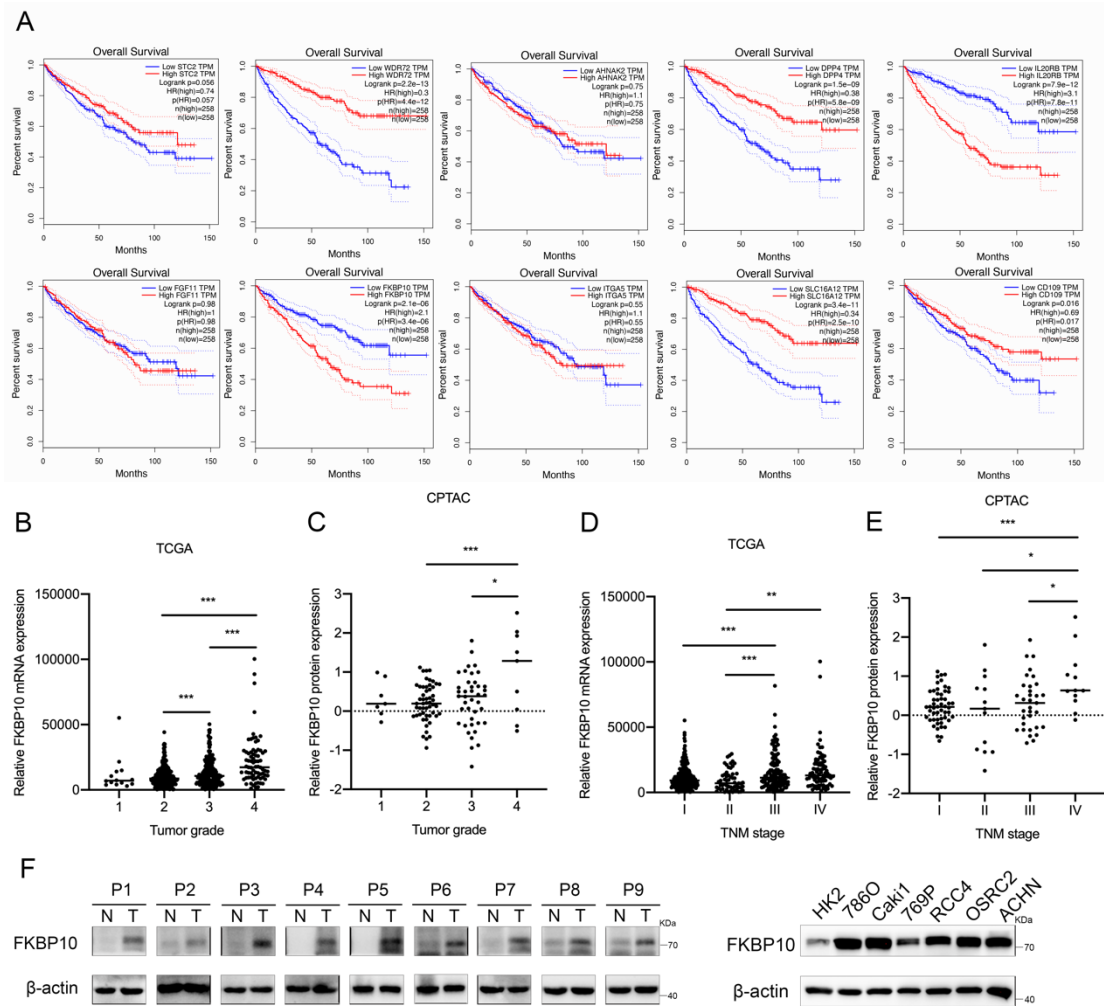

**Supplementary Fig. 1** (A) Survival analyses (<http://gepia.cancer-pku.cn>). (B-C) Analyses of FKBP10 expression in four different pathological grades of ccRCC based on the TCGA-KIRC or CPTAC-KIRC datasets. (D-E) Analyses of FKBP10 expression in four different clinical stages of ccRCC based on the TCGA-KIRC or CPTAC-KIRC datasets. (F) Expression of FKBP10 in 9 paired ccRCC samples and in human renal tubular epithelial cell line HK2 and various ccRCC cell lines. Statistical analyses were performed with a two-tailed unpaired Student's t test (NS,  $P > 0.05$ , \*  $P < 0.05$ , \*\*  $P < 0.01$ , \*\*\*  $P < 0.001$ ).

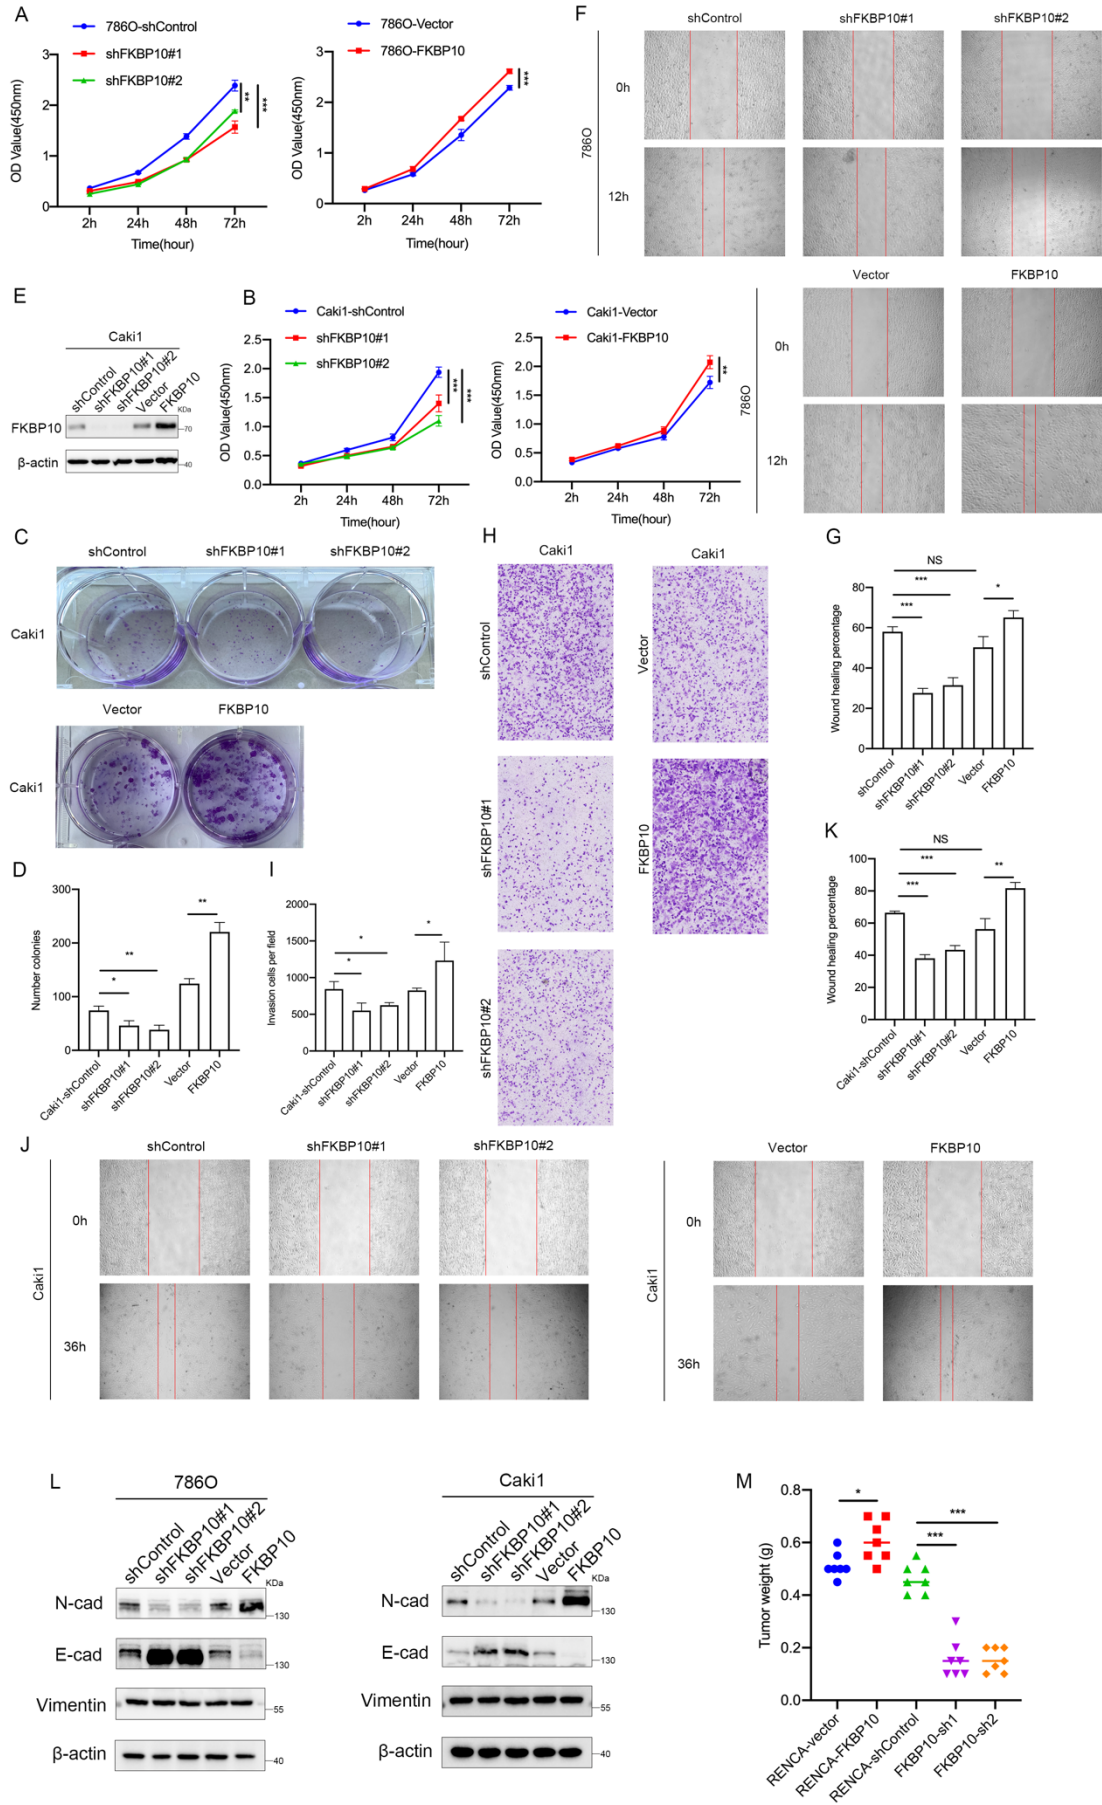

**Supplementary Fig. 2 (A-D)** Cell proliferation as determined by CCK-8 and colony formation assays. (E) The overexpression or knockdown of FKBP10 in Caki1 cells were measured by Western blot. (F-K) Cell migration and invasion as determined by wound healing and Transwell assays. Red lines denote the margins of the wound. Scale bar: 100 $\mu$ m. The results are presented as mean  $\pm$  SD of three independent experiments. (L) Western blot analyses of indicated proteins in 786O or Caki1 cells with FKBP10 overexpressed or knockdown. (M) Statistical analysis of tumor weights. Statistical analyses were performed with a two-tailed unpaired Student's t test (NS,  $P > 0.05$ , \*  $P < 0.05$ , \*\* $P < 0.01$ , \*\*\* $P < 0.001$ ).

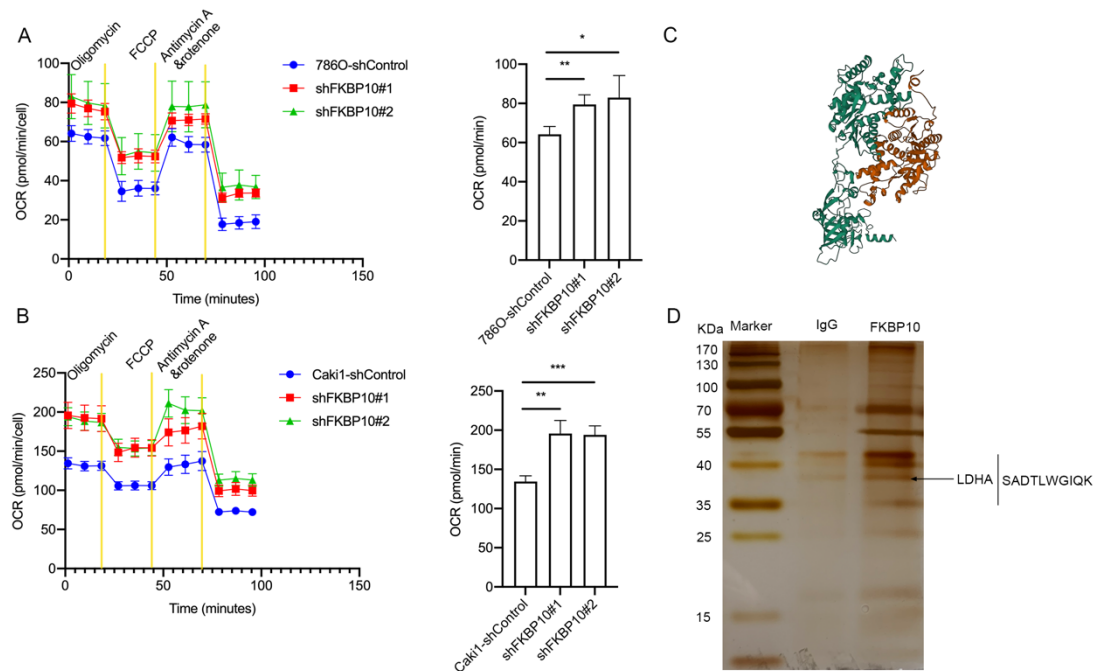

**Supplementary Fig. 3 (A-B)** Oxygen consumption rate (OCR) of 786O and Caki1 cells with FKBP10 knockdown. (C) Modeling of FKBP10 binding with LDHA. FKBP10 is colored green, and LDHA is colored red. (D) Proteins immunoprecipitated by FKBP10 or mouse IgG antibody were separated by SDS-PAGE and silver-stained. Arrowed band, which specifically bound with FKBP10, was cut out and identified by LS-MS/MS analysis. Statistical analyses were performed with a two-tailed unpaired Student's t test (\*  $P < 0.05$ , \*\* $P < 0.01$ , \*\*\* $P < 0.001$ ).

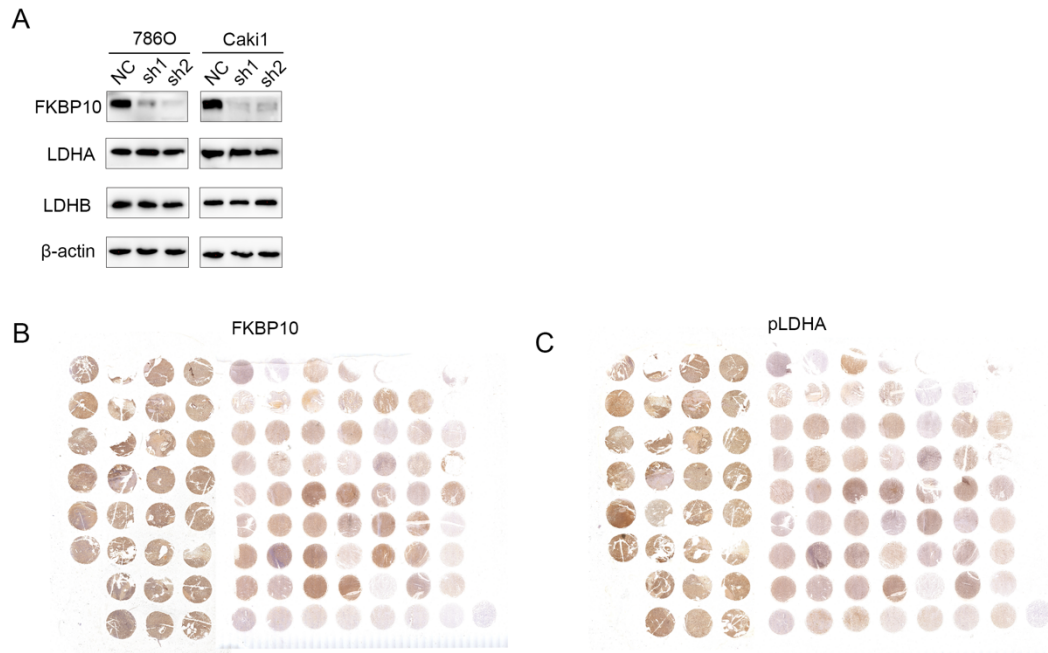

**Supplement Fig. 4** (A) Western blot analysis of indicated proteins in 786O or Caki1 cells with FKBP10 knockdown. (B-C) IHC staining images of human ccRCC tissue microarray elucidated by FKBP10 or pLDHA antibody.

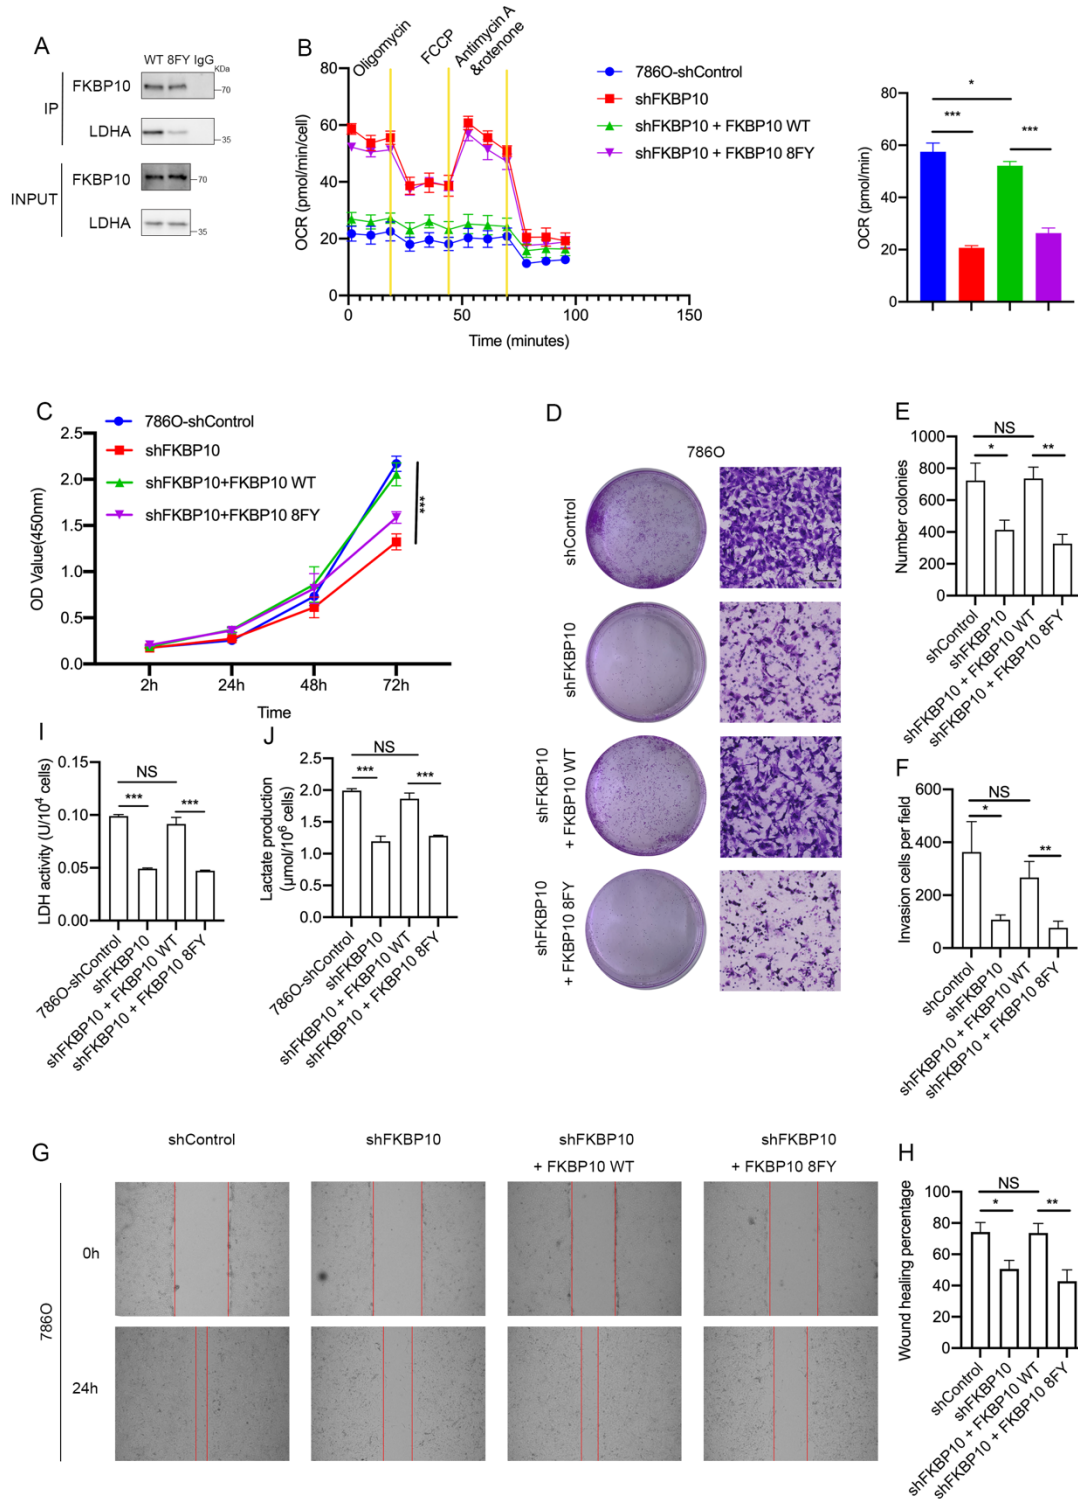

**Supplement Fig. 5** (A) Co-IP analysis of the interaction between FKBP10 and LDHA in HEK293 cells with FKBP10-8FY overexpressed. (B) OCR analysis of 786O cells transfected with the indicated plasmids. (C-F) Cell proliferation as determined by CCK-8 assays and colony formation assays. Cell invasion as determined by Transwell assays. Scale bar: 100μm. (G-H) Cell migration as determined by wound healing assays. Red lines denote the margins of the wound. (I-J) Lactate production levels and LDH enzyme activity in 786O or Caki1 cells transfected with the indicated plasmids were examined.

The results are presented as mean  $\pm$  SD of three independent experiments. Statistical analyses were performed with a two-tailed unpaired Student's t test (NS,  $P > 0.05$ , \*  $P < 0.05$ , \*\* $P < 0.01$ , \*\*\* $P < 0.001$ ).



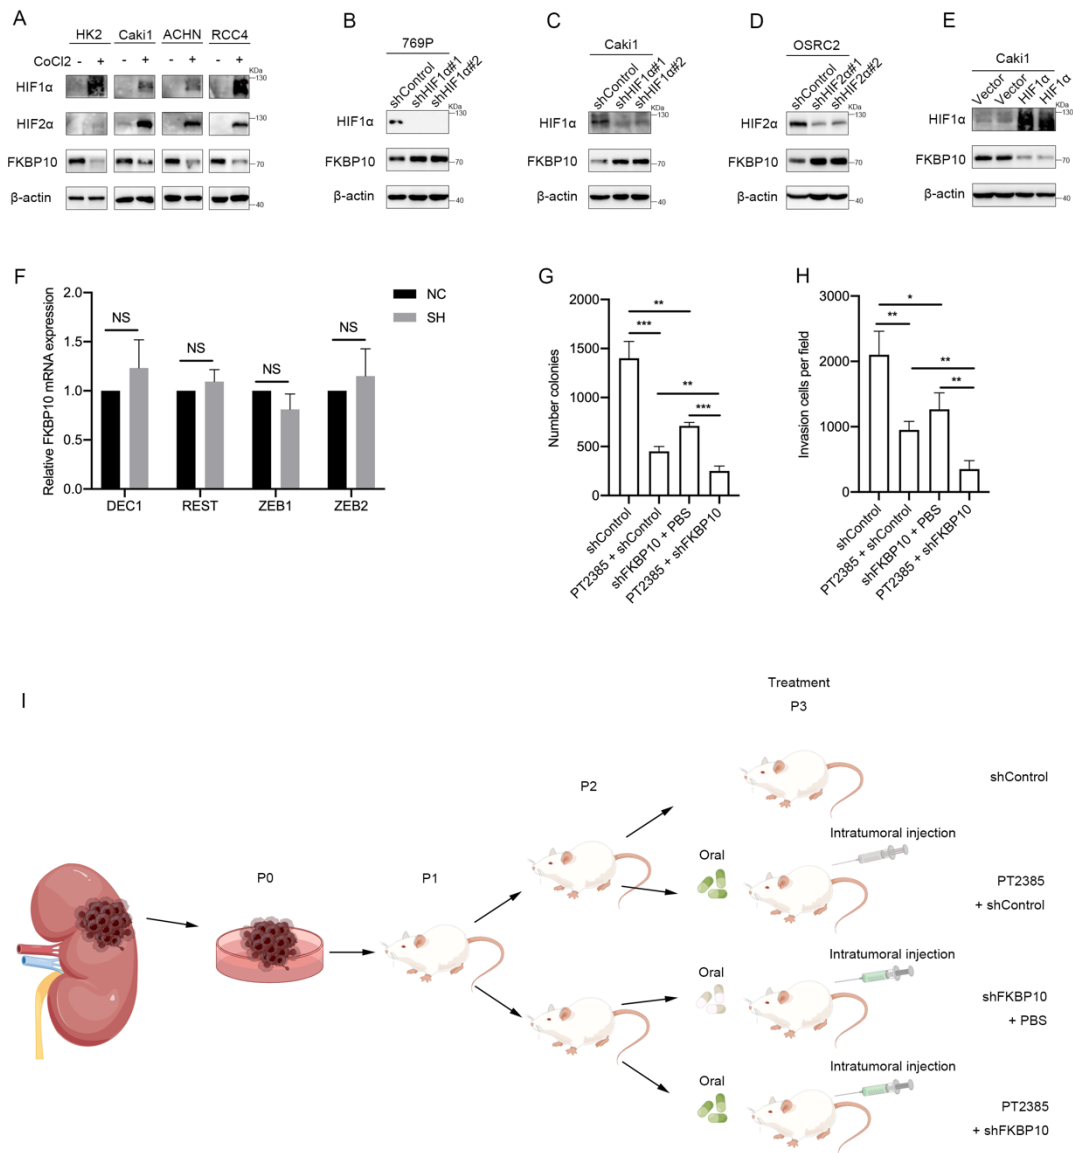

**Supplementary Fig. 6** (A) HK2, Caki1, ACHN and RCC4 cells were treated with CoCl<sub>2</sub> (200  $\mu$ M) for 24h, followed by Western blot analysis. (B-C) Western blot analyses of indicated proteins in 769P or Caki1 cells with HIF1 $\alpha$  knockdown. (D) Western blot analysis of indicated proteins in OSRC2 cells with HIF2 $\alpha$  knockdown. (E) Western blot analysis of indicated proteins in Caki1 cells with HIF1 $\alpha$  overexpressed. (F) The mRNA levels of *FKBP10* in 786O cells with DEC1, REST, ZEB1 or ZEB2 knockdown. (G-H) Lactate production levels and LDH enzyme activity in 786O-NC or 786O-shFKBP10 cells treated with PT2385 (20  $\mu$ M) or PBS. The results are presented as mean  $\pm$  SD of three independent experiments. (I) Schematic diagram of PDX model construction of ccRCC. Statistical analyses were performed with a two-tailed unpaired Student's t test (NS, P > 0.05, \* P < 0.05, \*\*P < 0.01, \*\*\*P < 0.001).

Supplementary Table 1. Clinicopathological characteristics in 79 ccRCC patients with different FKBP10 expression level

Data were shown as n (%).

| Parameter                   | Total      | FKBP10 expression |     | P value |
|-----------------------------|------------|-------------------|-----|---------|
|                             |            | High              | Low |         |
| Age (year)                  |            |                   |     | 0.25    |
| <60                         | 42 (53.2)  | 28                | 14  |         |
| ≥60                         | 37 (46.8)  | 29                | 8   |         |
| Gender                      |            |                   |     | 0.44    |
| Female                      | 23 (29.1)  | 18                | 5   |         |
| Male                        | 56 (70.9)  | 39                | 17  |         |
| Tumor stage                 |            |                   |     | 0.09    |
| I / II                      | 60 (75.9)  | 44                | 16  |         |
| III/IV                      | 19 (24.1)  | 10                | 9   |         |
| Grade                       |            |                   |     | 0.017*  |
| 1                           | 23(29.1)   | 11                | 12  |         |
| 2/3                         | 56 (70.9)  | 43                | 13  |         |
| Size (Longest Diameter, cm) |            |                   |     | 0.029*  |
| <7                          | 62 (78.5)  | 42                | 20  |         |
| ≥7                          | 11 (13.9)  | 11                | 0   |         |
| Metastasis                  |            |                   |     | 0.0008* |
| M0                          | 56 (70.89) | 35                | 21  |         |
| M1                          | 20 (25.3)  | 20                | 0   |         |

\*P value < 0.05

Supplementary Table 2. Univariate and multivariate Cox regression analyses of different parameters on disease-free survival

| Parameter         | Univariate Analysis    |         | Multivariate Analysis |         |
|-------------------|------------------------|---------|-----------------------|---------|
|                   | HR (95%CI)             | P value | HR (95%CI)            | P value |
| Age (year)        | 1.001 (0.968,1.035)    | 0.94    | -                     | -       |
| Gender            | 1.13 (0.445, 2.868)    | 0.79    | -                     | -       |
| Stage             | 1.239 (0.845, 1.817)   | 0.27    | -                     | -       |
| Grade             | 2.227 (1.168, 4.147)   | 0.015*  | 1.651 (0.757, 3.603)  | 0.208   |
| Metastasis        | 10.117 (4.318, 23.708) | <0.001* | 4.093 (1.452, 11.542) | 0.008*  |
| Size              | 1.283 (1.13, 1.458)    | <0.001* | 1.055 (0.905, 1.231)  | 0.495   |
| FKBP10 expression | 1.443 (1.242, 1.675)   | <0.001* | 1.198 (0.999, 1.436)  | 0.051   |

HR: hazard ratio; CI: confidence interval



Supplementary Table 3. Antibodies used in this study.

| Name (Species)                | Catalog number | Company     | Application   |
|-------------------------------|----------------|-------------|---------------|
| $\beta$ -actin (Rabbit)       | AF7018         | Affinity    | WB            |
| FKBP10 (Rabbit)               | 12172-1-AP     | Proteintech | WB; IHC       |
| FKBP10 (Mouse)                | D-4            | SANTA CRUZ  | IP; IF        |
| N-cadherin (Rabbit)           | 22018-1-AP     | Proteintech | WB; IF        |
| E-cadherin (Mouse)            | BF0219         | Affinity    | WB; IF        |
| LDHA (Rabbit)                 | 19987-1-AP     | Proteintech | IP            |
| LDHA (Rabbit)                 | DF6280         | Affinity    | WB; IF        |
| pLDHA (Y10)                   | AF7172         | Affinity    | IHC; WB; IF   |
| LDHB (Rabbit)                 | ab53292        | Abcam       | WB            |
| His-Tag (Rabbit)              | 12698          | CST         | WB; IP        |
| DYKDDDDK Tag (Mouse)          | 8146           | CST         | WB; IP        |
| FGFR1 (Rabbit)                | Ab76464        | Abcam       | WB            |
| Ki67 (Rabbit)                 | AF0198         | Affinity    | IHC           |
| pFGFR1(Y653+Y654)<br>(Rabbit) | AF8210         | Affinity    | WB            |
| L-Lactyl Lysine (Rabbit)      | PTM-1401RM     | PTM BIO     | WB            |
| H3K141a (Rabbit)              | PTM-1414RM     | PTM BIO     | WB            |
| H3K181a (Rabbit)              | PTM-1427RM     | PTM BIO     | WB            |
| H3K561a (Rabbit)              | PTM1421RM      | PTM BIO     | WB            |
| Histone H3 (Rabbit)           | PTM-6613       | PTM BIO     | WB            |
| HIF1 $\alpha$ (Rabbit)        | 36169          | CST         | WB; ChIP      |
| HIF2 $\alpha$ (Rabbit)        | 87179          | CST         | WB; IHC; ChIP |
| VHL (Rabbit)                  | 68547          | CST         | WB            |

Supplementary Table 4. FKBP10 partners were identified using IP-MS (Top 10)

| Protein IDs | Gene symbol | Coverage | Unique peptides | Abundances (Grouped) |
|-------------|-------------|----------|-----------------|----------------------|
| P67809      | YBX1        | 60       | 7               | 77384138.41          |
| F8W1R7      | MYL6        | 58       | 6               | 67947471.44          |
| P00338      | LDHA        | 51       | 10              | 112933586.8          |
| P23396      | RPS3        | 50       | 10              | 55631766.69          |
| P63173      | RPL38       | 49       | 4               | 7708917.875          |
| P22626      | HNRNPA2B1   | 48       | 14              | 95398792.38          |
| P61247      | RPS3A       | 48       | 13              | 158444820            |
| E5RI99      | RPL30       | 48       | 4               | 10053958.19          |
| O14950      | MYL12B      | 45       | 1               | 12909184             |

Supplementary Table 5. Interfering sequences used in knockdown experiments.

| Name               | Sequence (5'-3')      |
|--------------------|-----------------------|
| shFKBP10-1         | CCATCCCTAAACCACTTCCTT |
| shFKBP10-2         | CCACTACAATGGCTCCTTGAT |
| shLDHA             | GATCTGTGATTAAAGCAGTAA |
| shHIF1 $\alpha$ -1 | CCGCTGGAGACACAATCATAT |
| shHIF1 $\alpha$ -2 | CCAGTTATGATTGTGAAGTTA |
| shHIF2 $\alpha$ -1 | CAGTACCCAGACGGATTTCAA |
| shHIF2 $\alpha$ -2 | GCGCAAATGTACCCAATGATA |
| shDEC1             | CCTACGAAGATTACTTAAGAA |
| shREST             | CGAGTCTACAAGTGTATCATT |
| shZEB1             | CCTCTCTGAAAGAACACATTA |
| shZEB2             | CCCACCATGAATAGTAATTTA |
| shControl          | CAACAAGATGAAGAGCACCAA |

Supplementary Table 6. Sequence of the DNA primers for qRT-PCR

| 基因            | Forward                 | Reverse                 |
|---------------|-------------------------|-------------------------|
| FKBP10        | AGAACCACATCGAAGTAGAGGG  | AGAACCACATCGAAGTAGAGGG  |
| GAPDH         | GGAGCGAGATCCCTCCAAAAT   | GGCTGTTGTCATACTTCTCATGG |
| HIF1 $\alpha$ | GAACGTCGAAAAGAAAAGTCTCG | CCTTATCAAGATGCGAACTCACA |
| HIF2 $\alpha$ | CGGAGGTGTTCTATGAGCTGG   | AGCTTGTGTGTTTCGCAGGAA   |
| DEC1          | ATGACAATGAATGTTCTGGAGGC | CATCATGTGTAACACGGCAAGA  |
| REST          | GCCGCACCTCAGCTTATTATG   | CCGGCATCAGTTCTGCCAT     |
| ZEB1          | GATGATGAATGCGAGTCAGATGC | ACAGCAGTGTCTTGTGTTGT    |
| ZEB2          | CAAGAGGCGCAAACAAGCC     | GGTTGGCAATACCGTCATCC    |
| Promoter-100  | AGGCCAGCTCAGTCTTCCCA    | CTTCTGTCCTCTTTCCCTA     |
| Promoter-657  | ATACGAGAAGGAAGCCCT      | AAGGTGTGCAGGTGACAG      |
| Promoter-1210 | TCTCTCCCTCGTACTGCT      | GCGCAGTACGAGAAGTA       |
| Promoter-1540 | TCCTTCGACCGATCTGTG      | CCTACCAGTACCTGCACT      |
| Promoter-1826 | CTCTAGGTCCGTGAGGGACT    | ACCGCCAAGTATCTCAACTA    |
